# Supplementary material for: HMGCS2 serves as a potential biomarker for inhibition of renal clear cell carcinoma growth
Source: Springer Nature journal article supplement (doi:10.1038/s41598-023-41343-7), 2023-09-05

Figure 7B(CDK1)

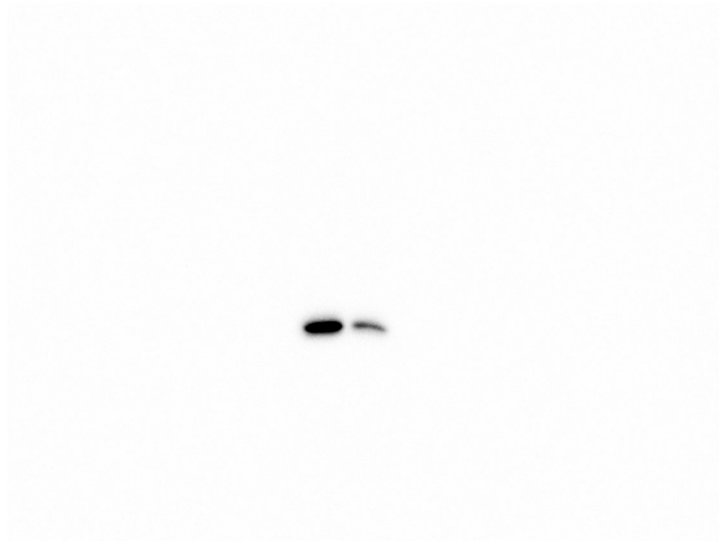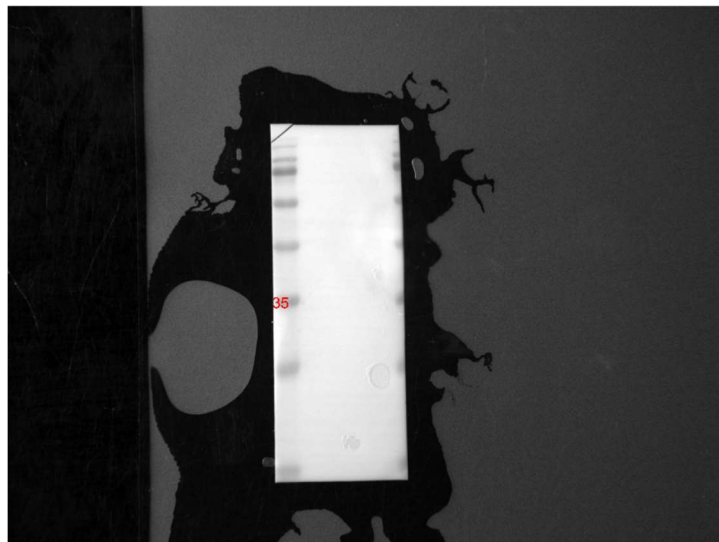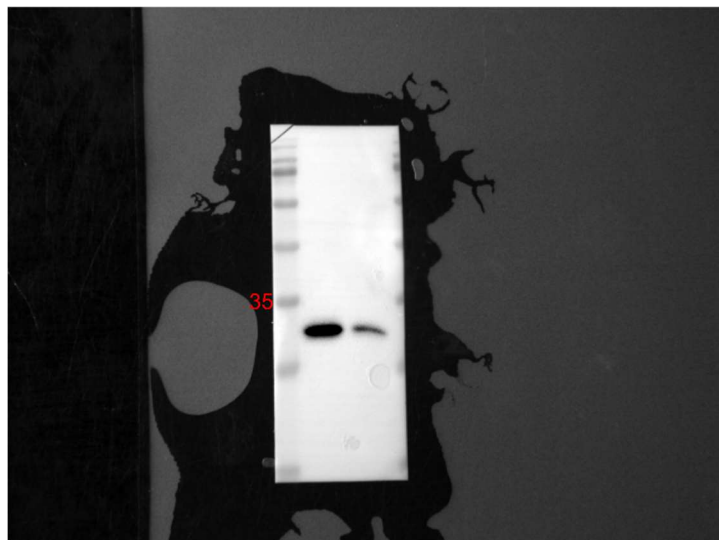

Figure 7B(CDK2)

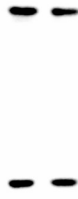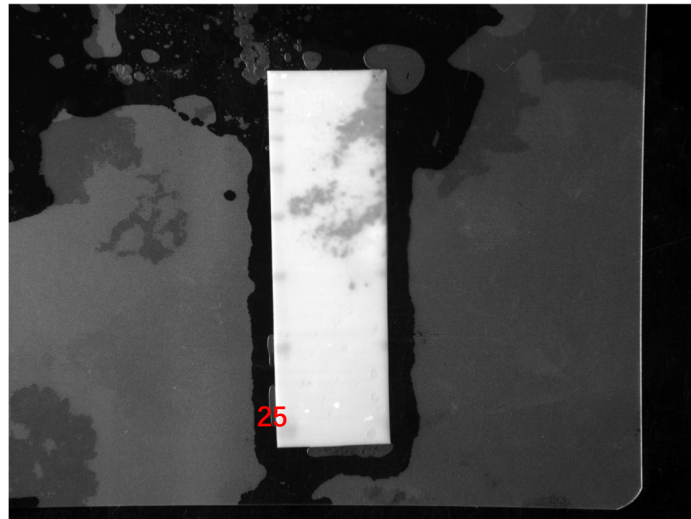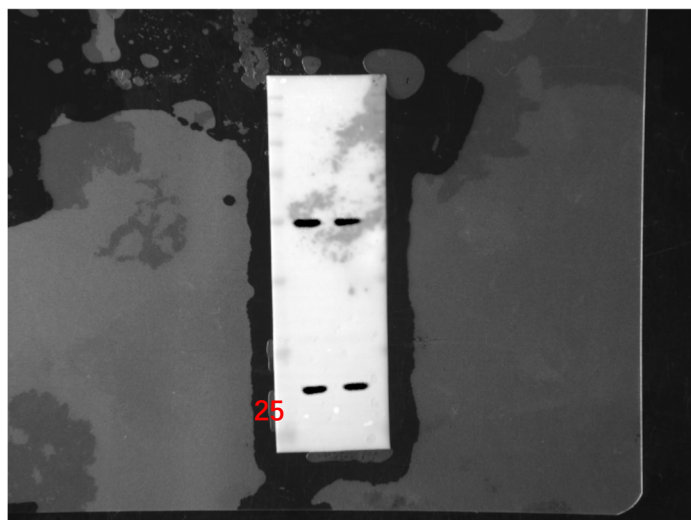

Figure 7B(CDK4)

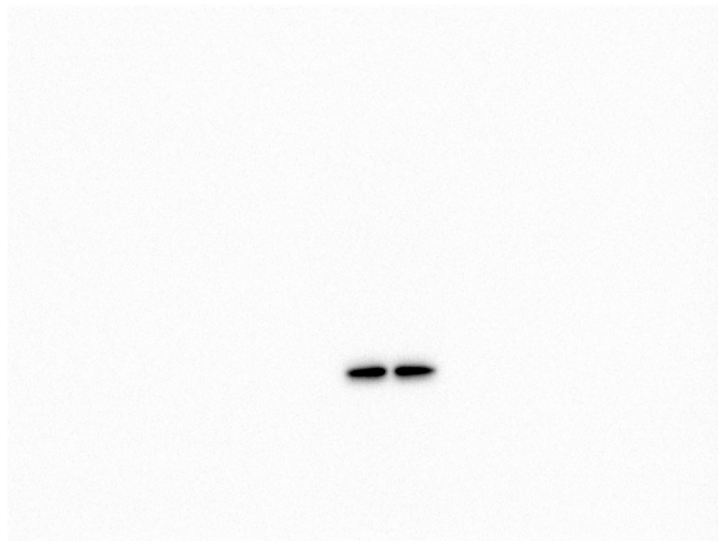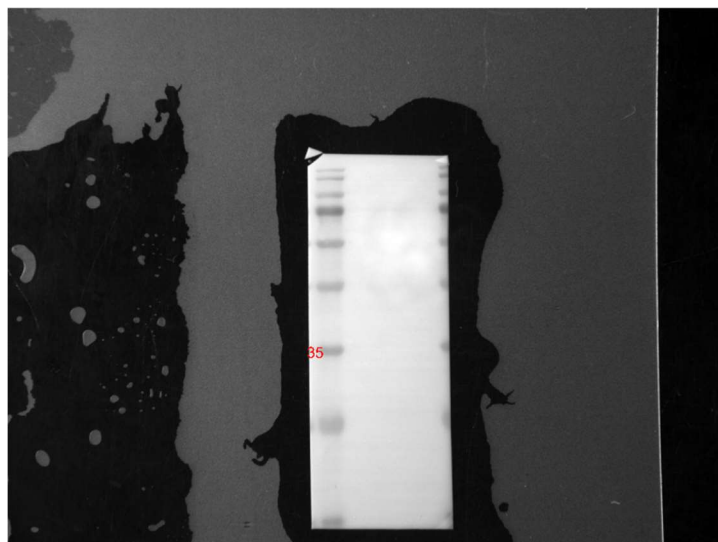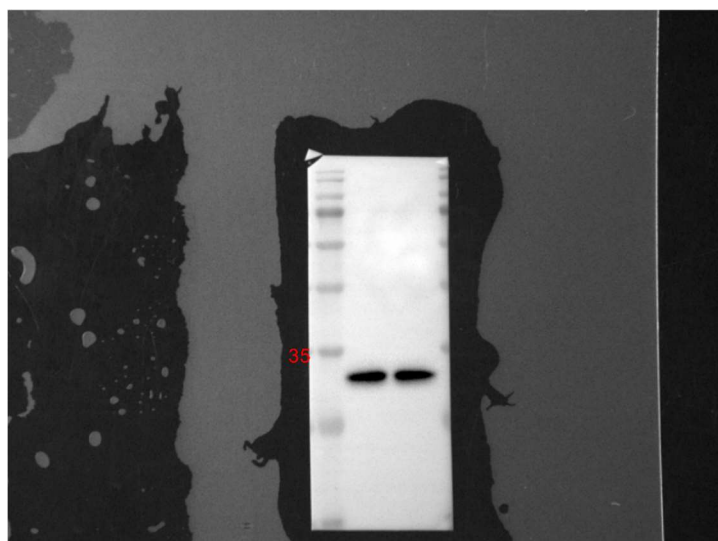

Figure 7B(CDK6)

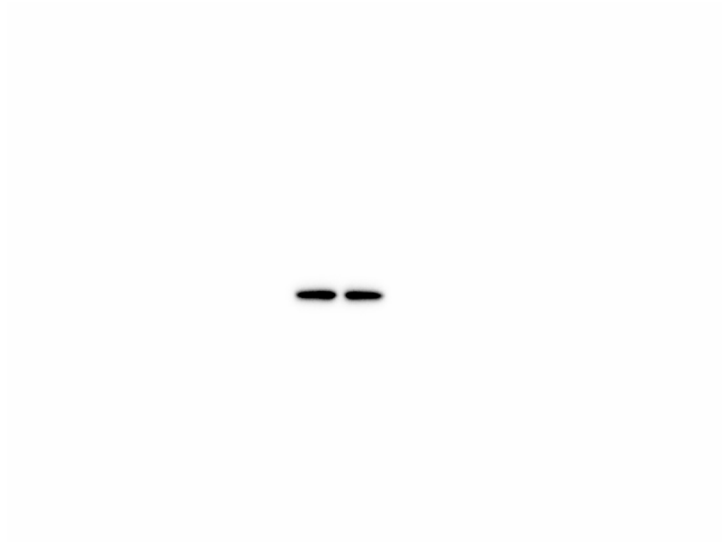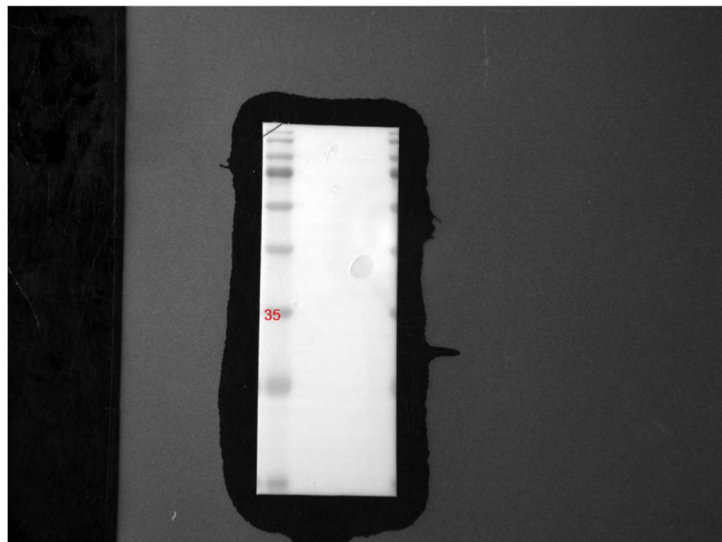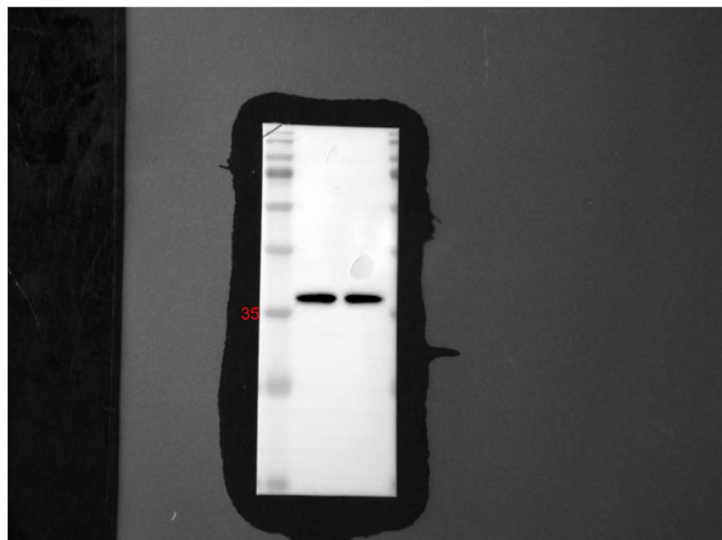

Figure 7B(CDK7)

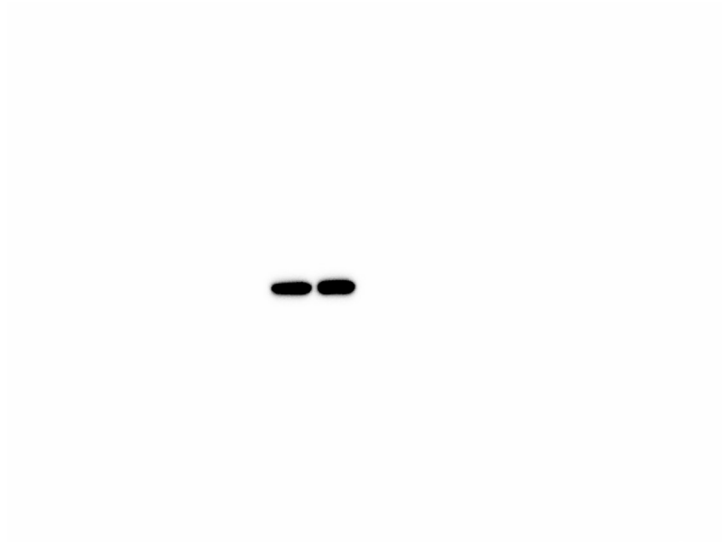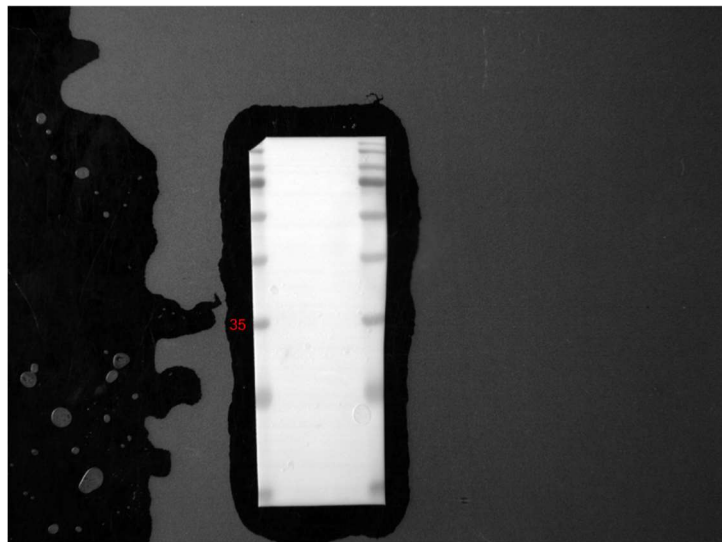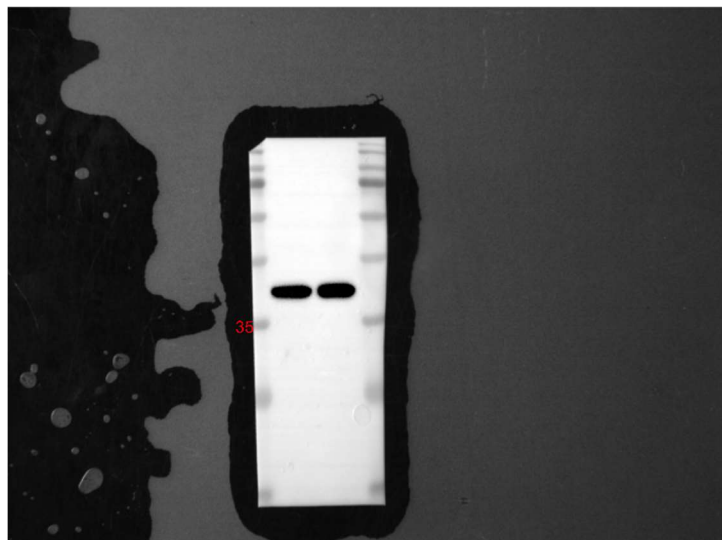

**Figure 7B(CDK9)**

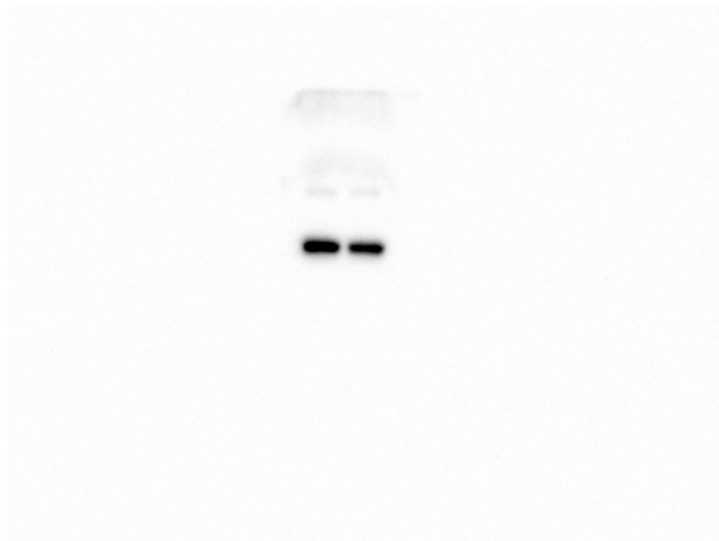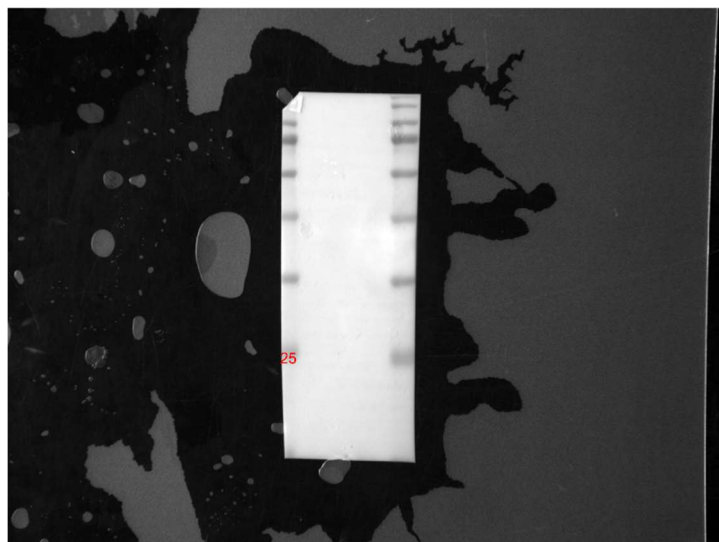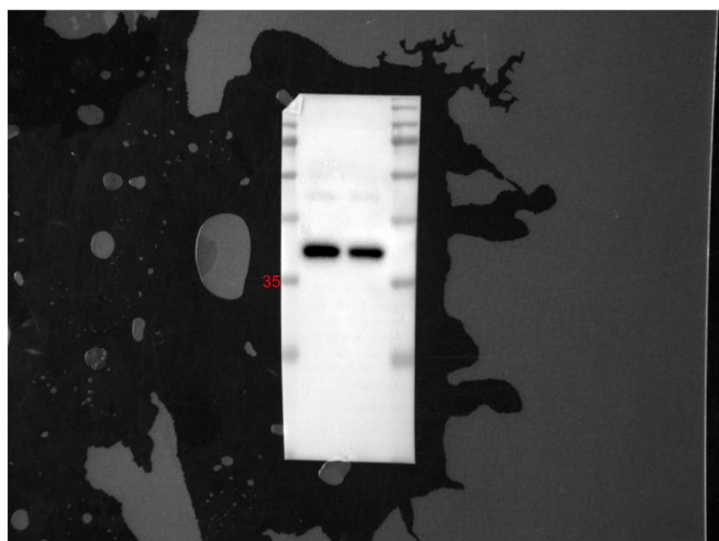

**Figure 7B(Tubulin)**

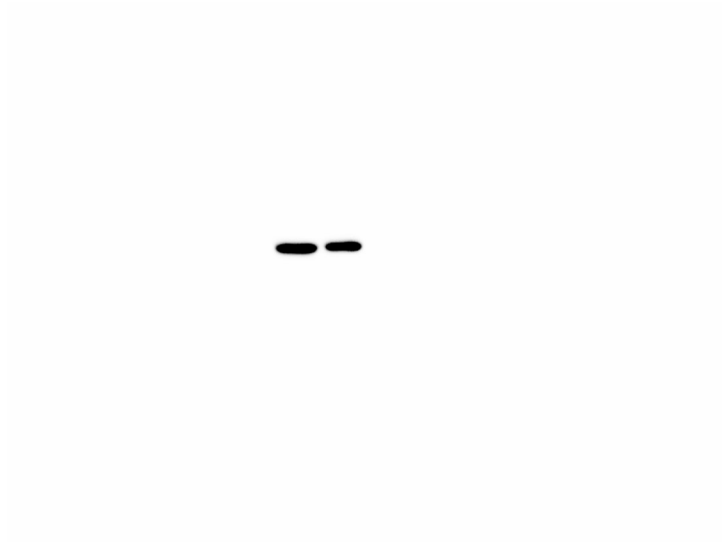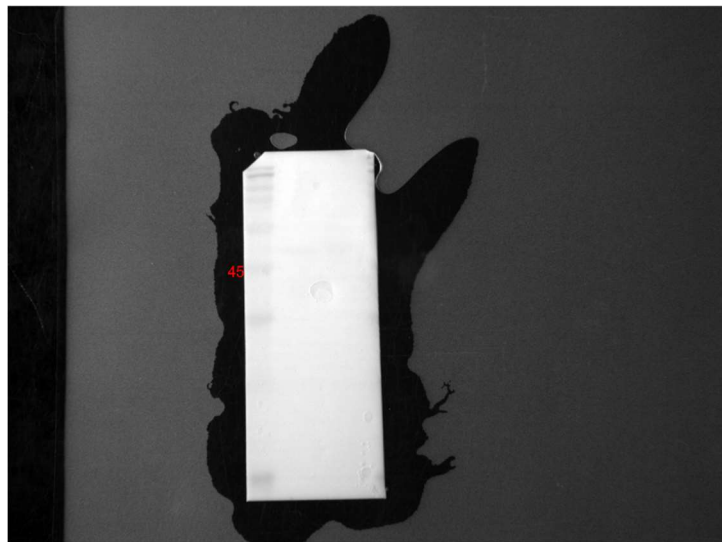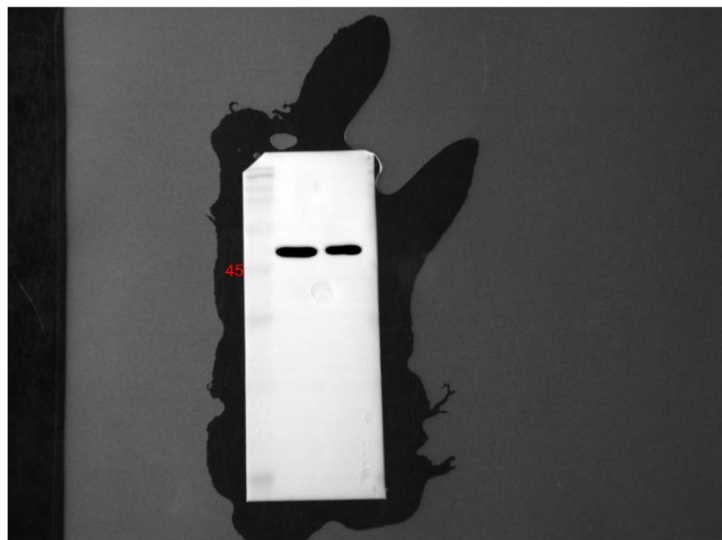

Figure 7C(P65)

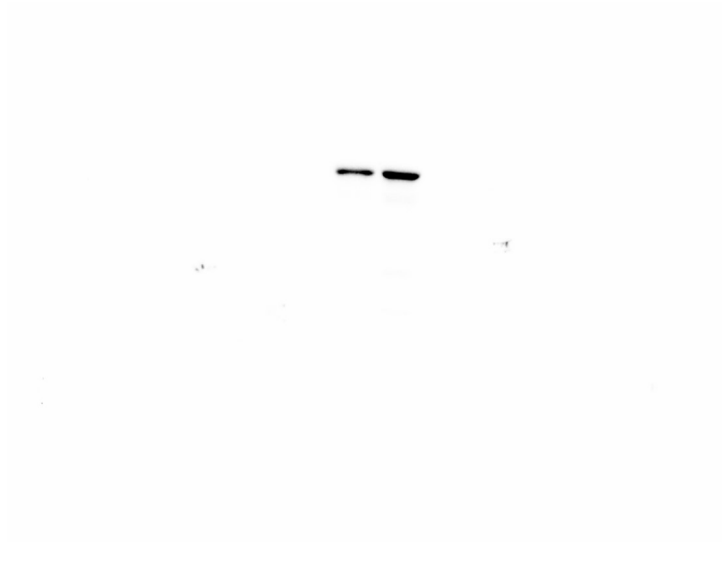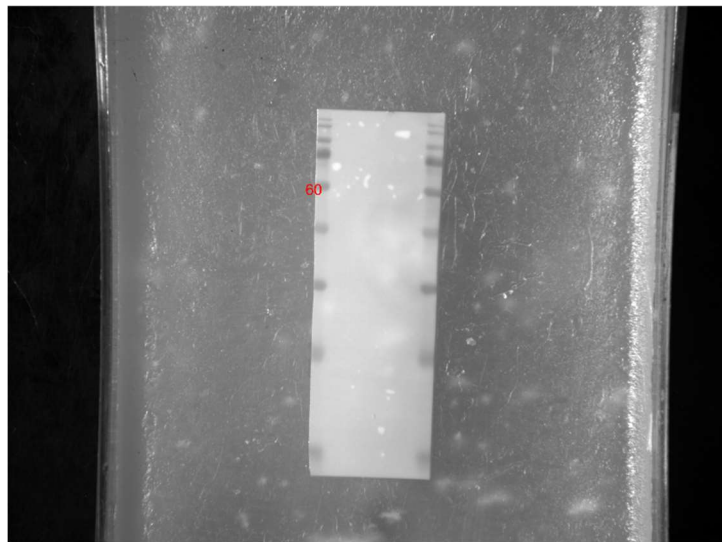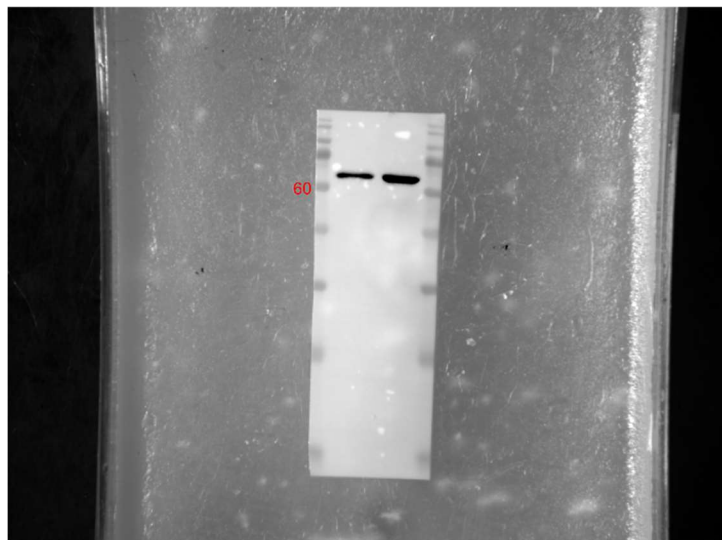

Figure 7C(Bcl2)

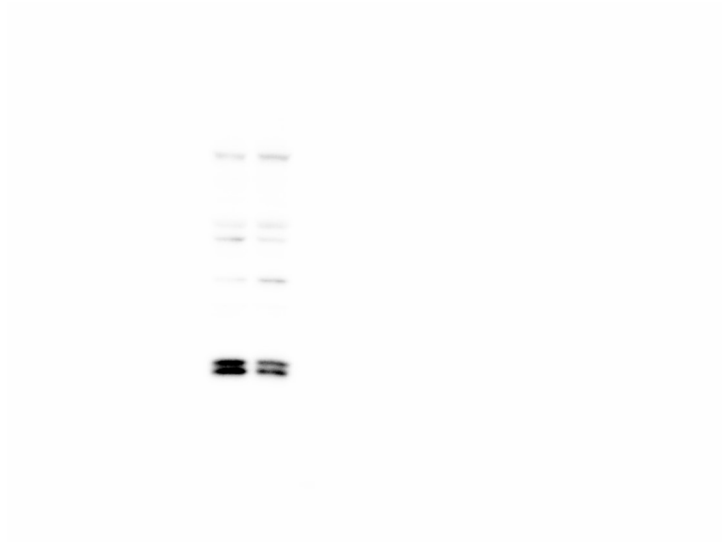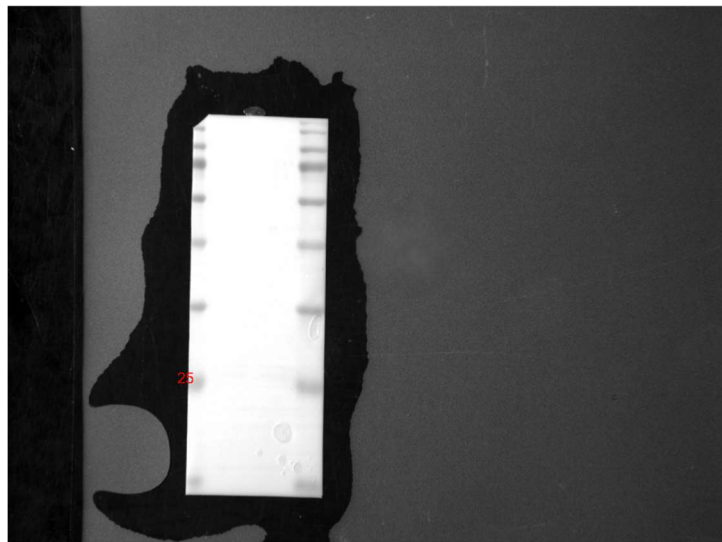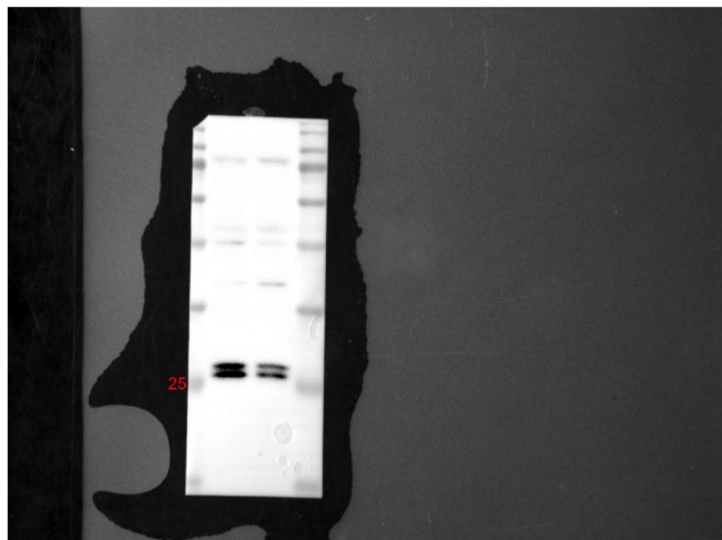

Figure 7C(Caspase3)

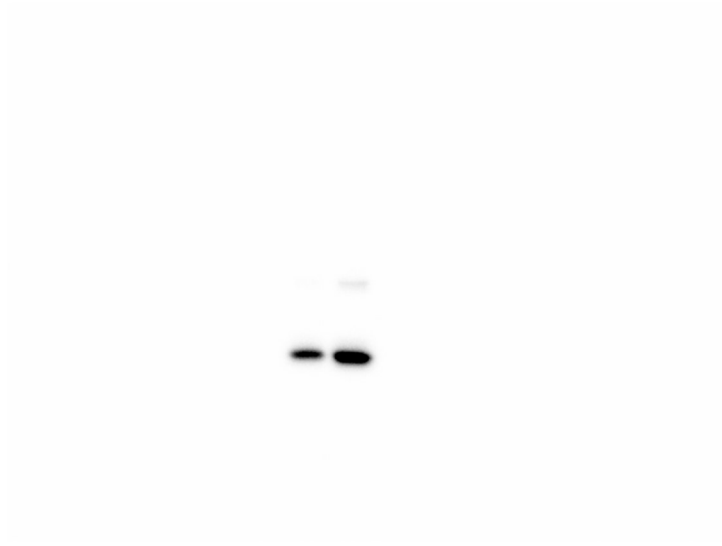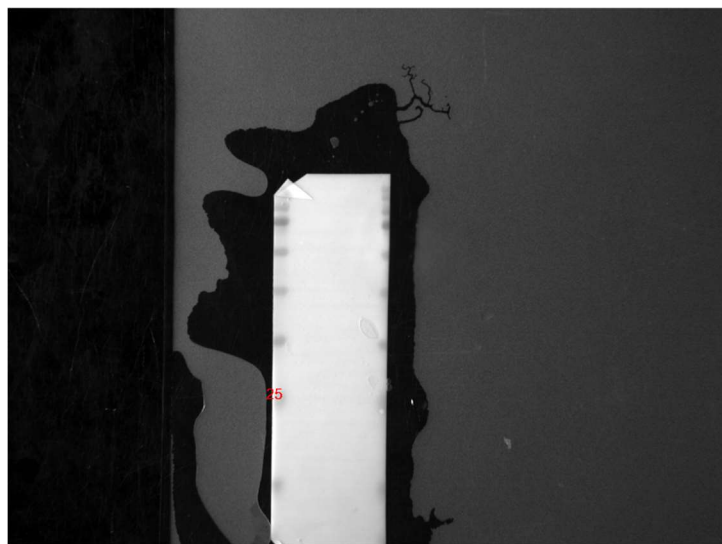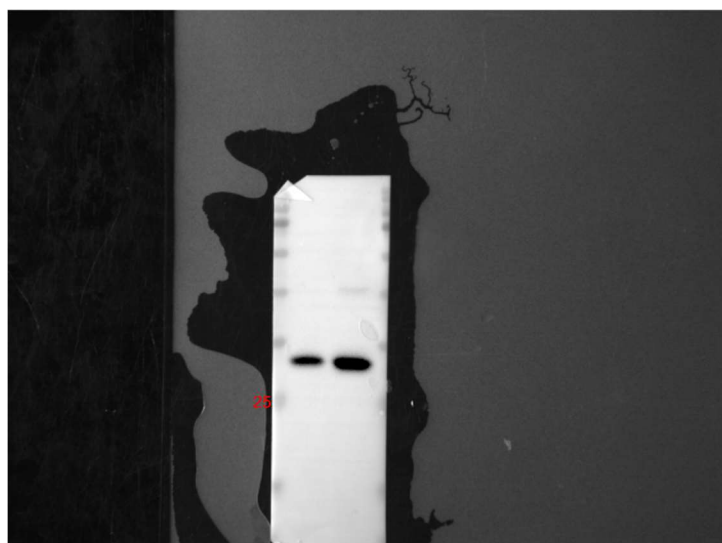

Figure 7C(P53)

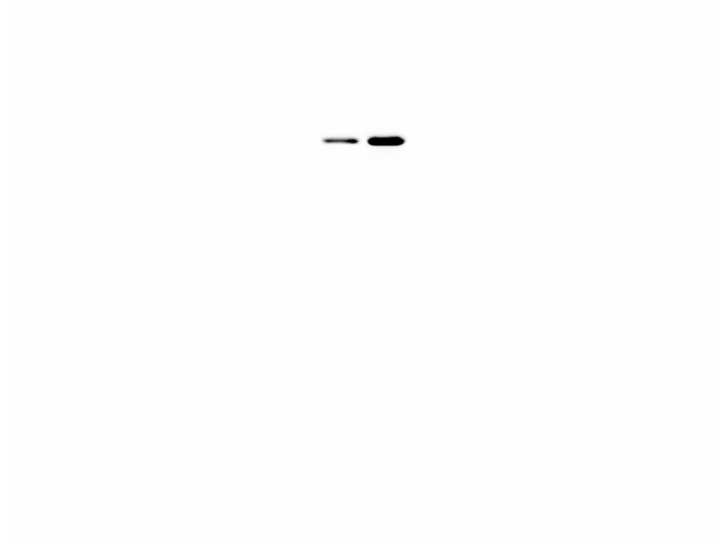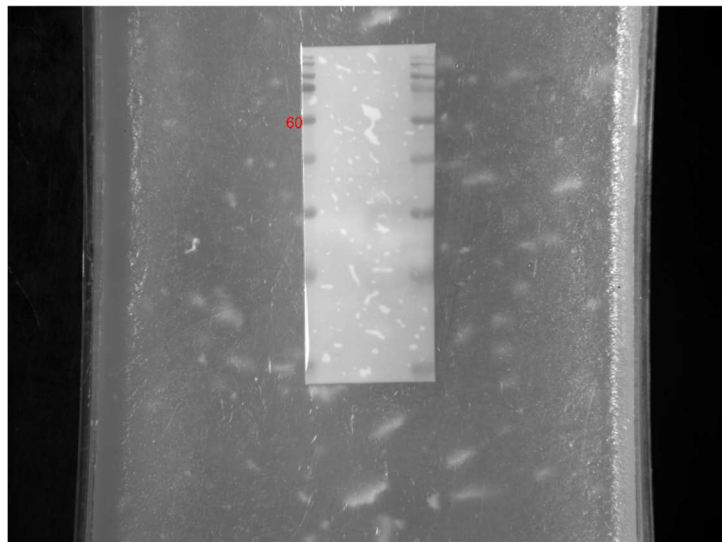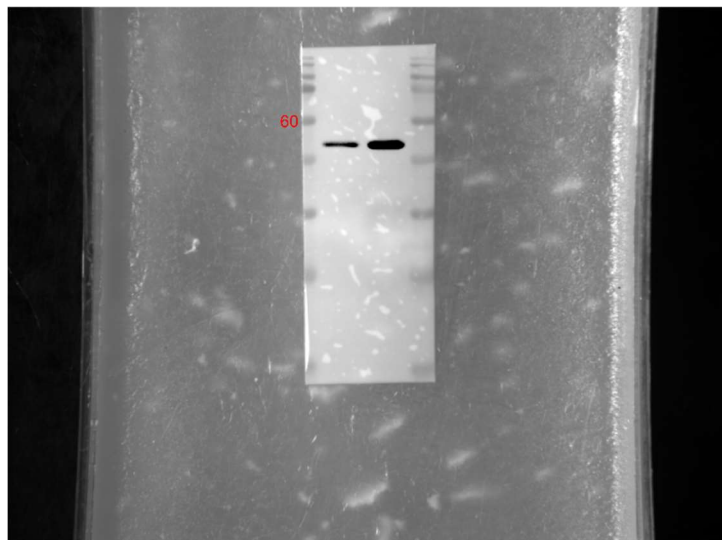

Figure 7C(P-erk)

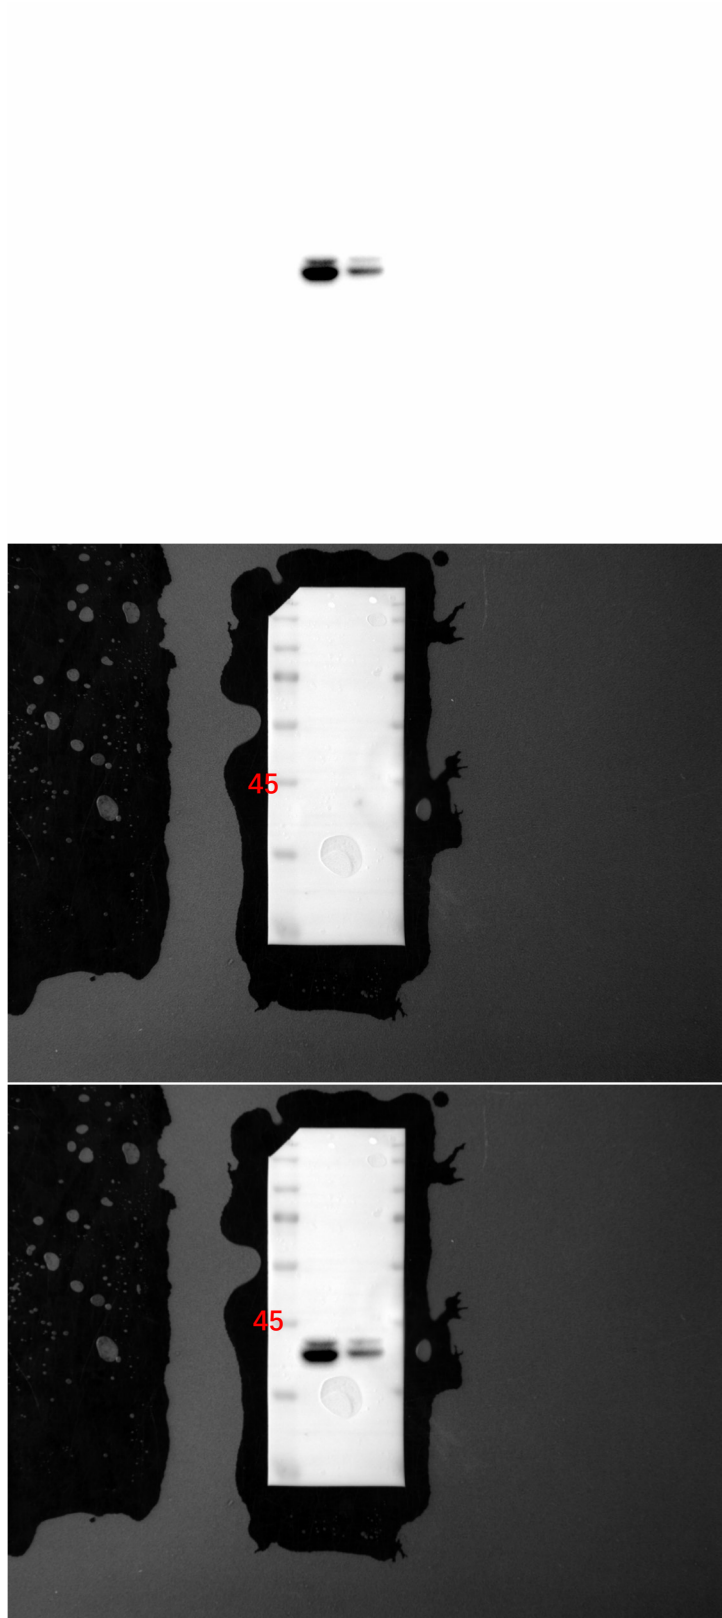

Figure 7C(Erk)

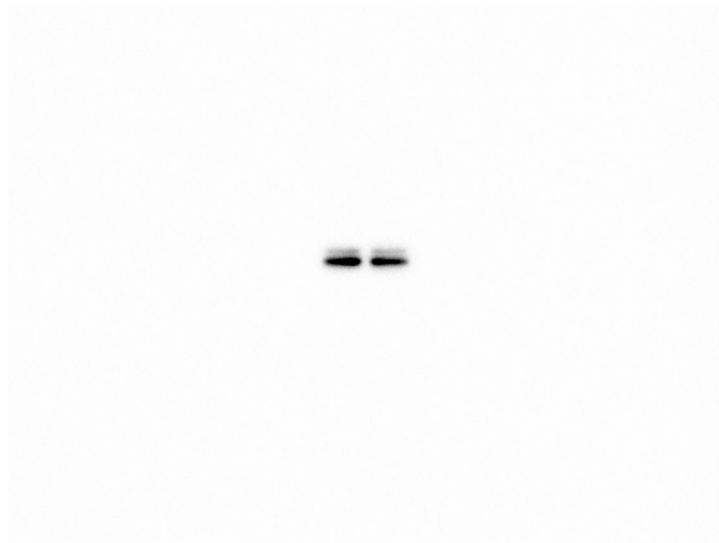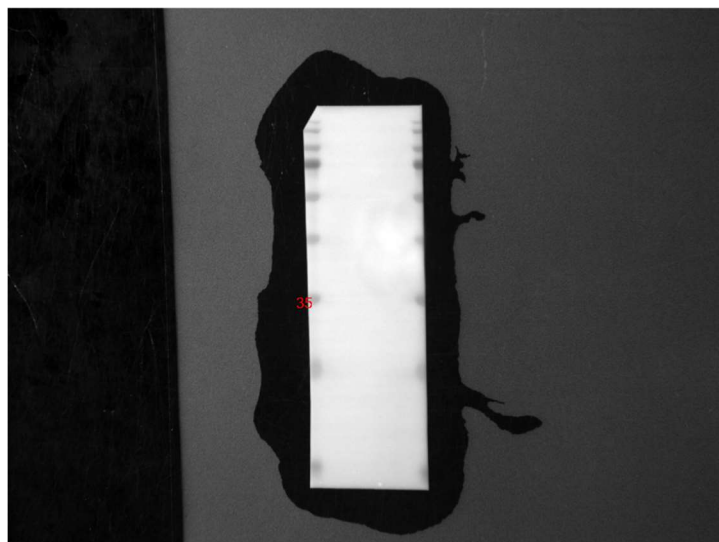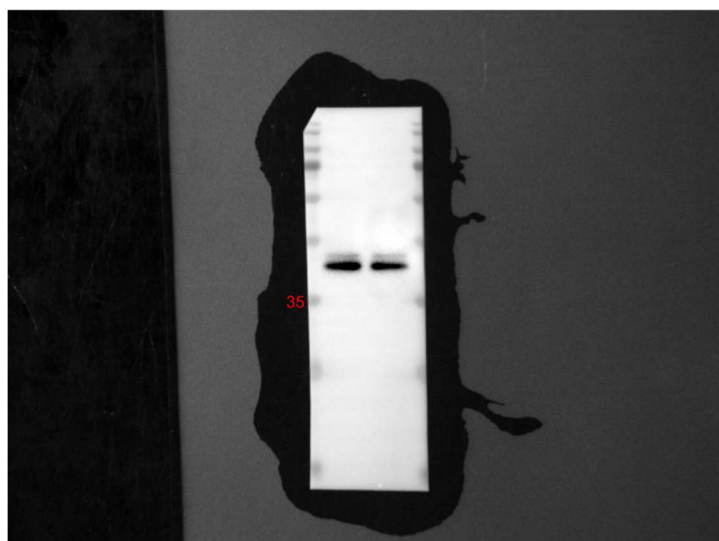

Figure 7C(Tubulin)

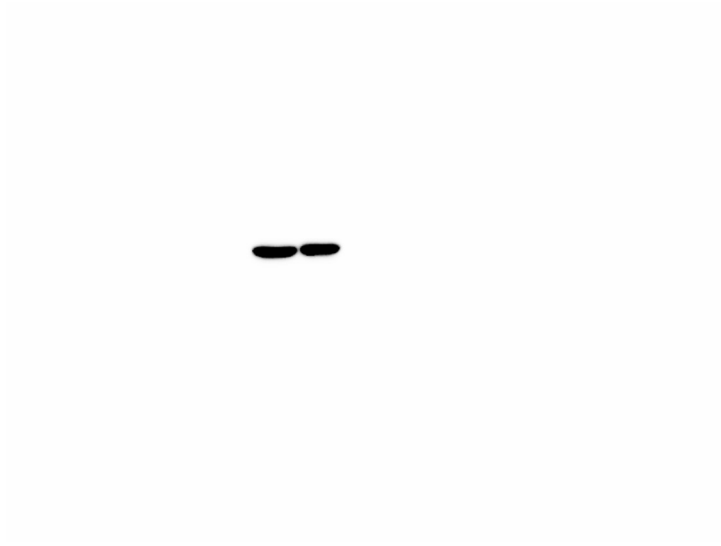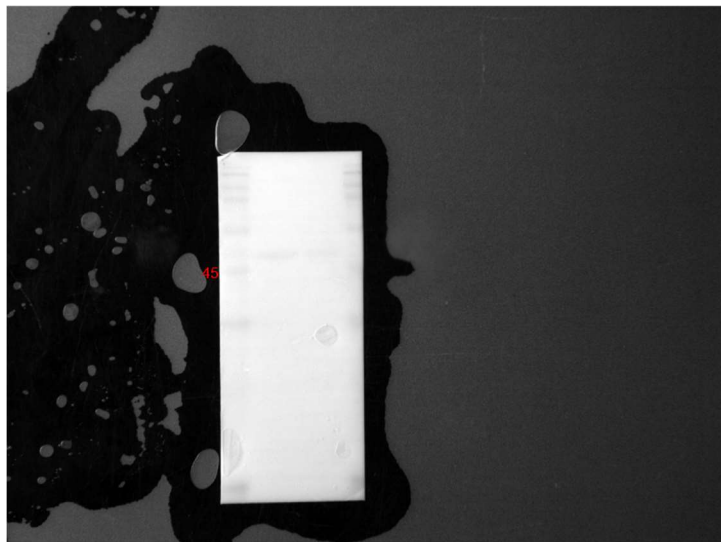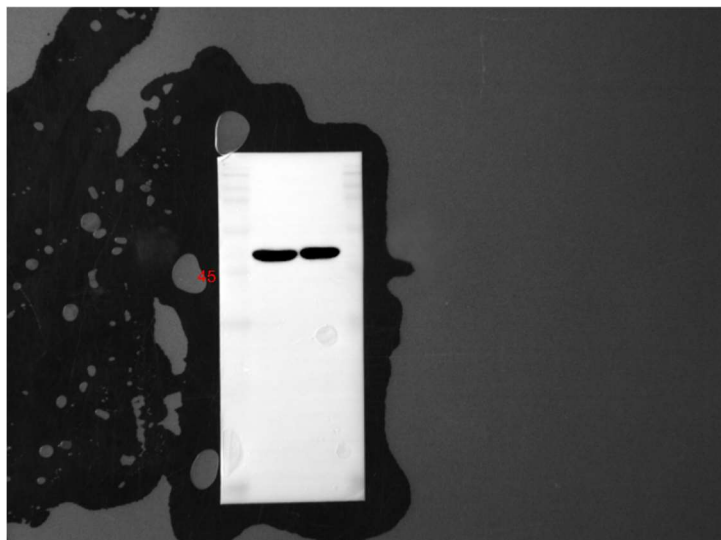

Figure 7D(ACADM)

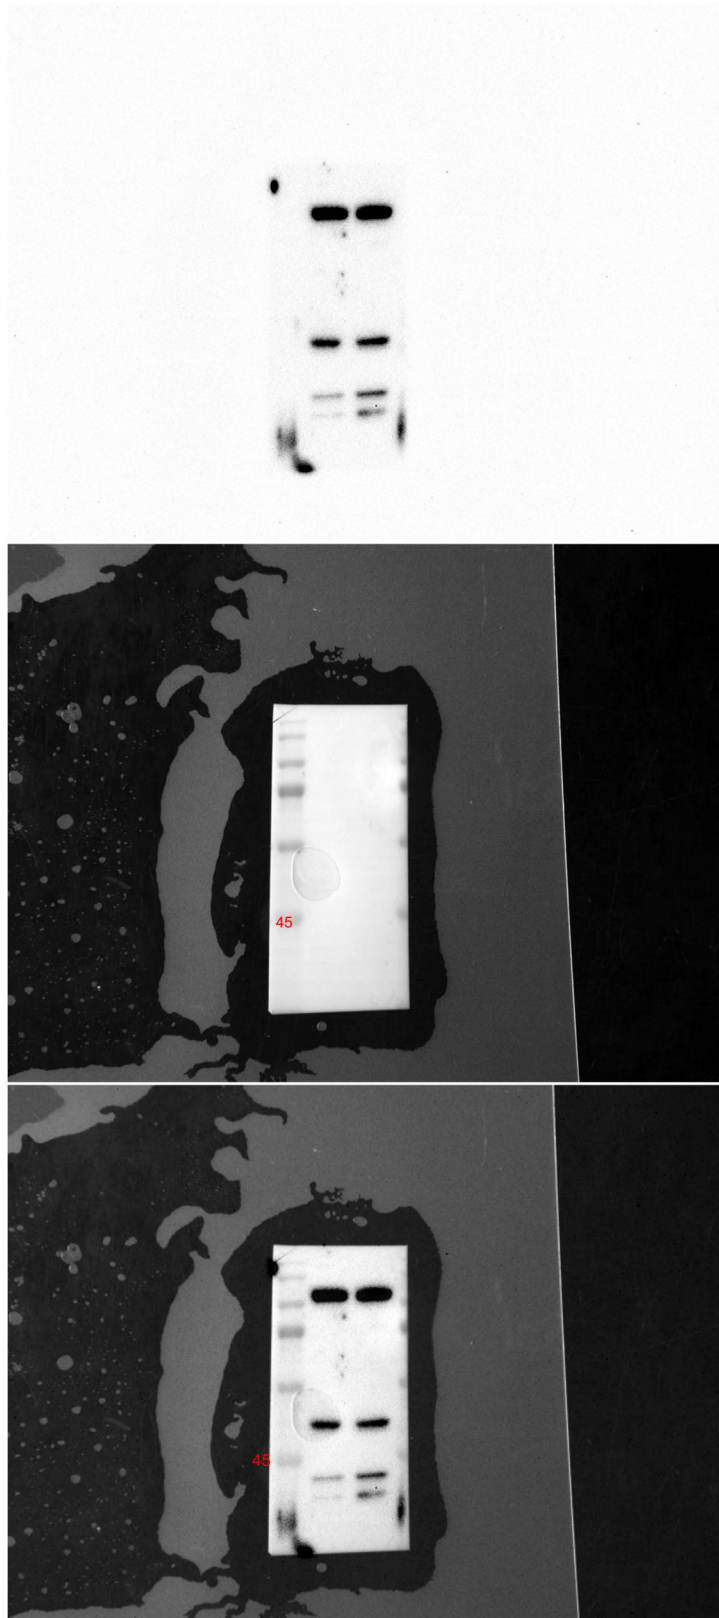

Figure 7D(HADH)

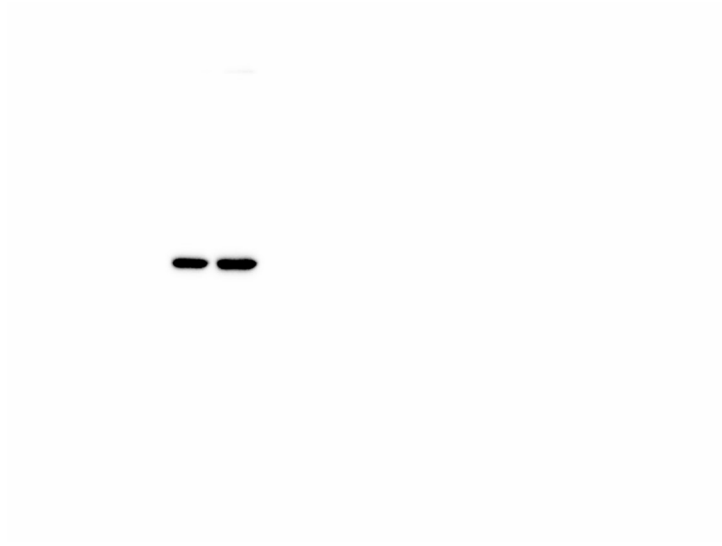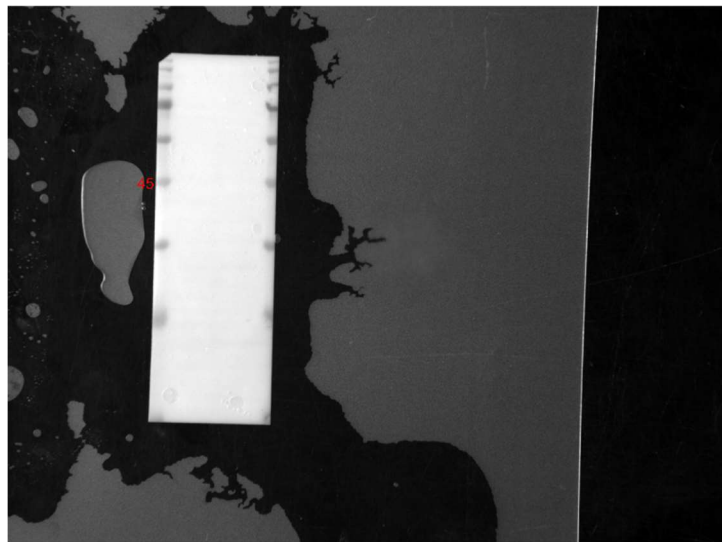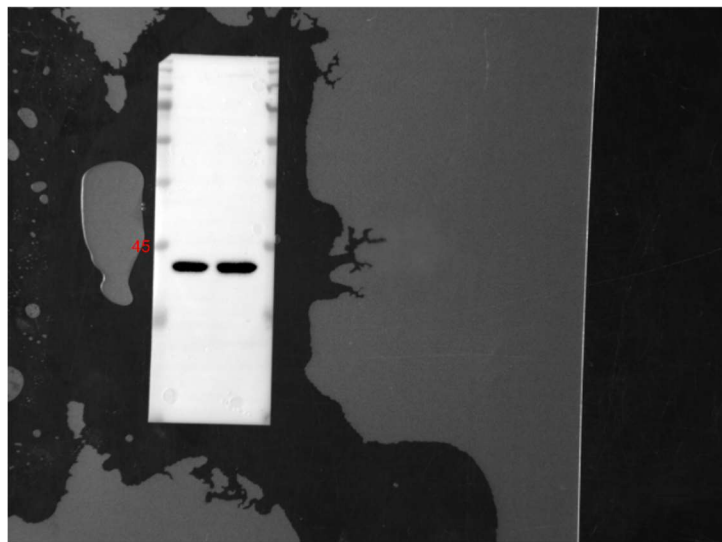

**Figure 7D(DRP1)**

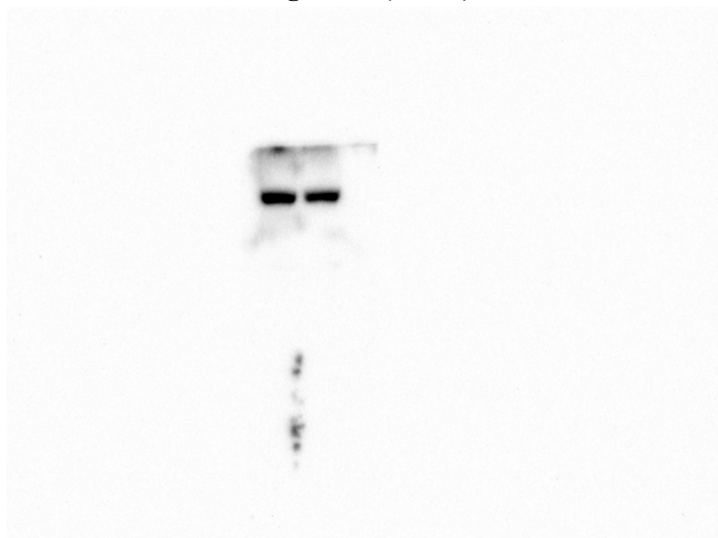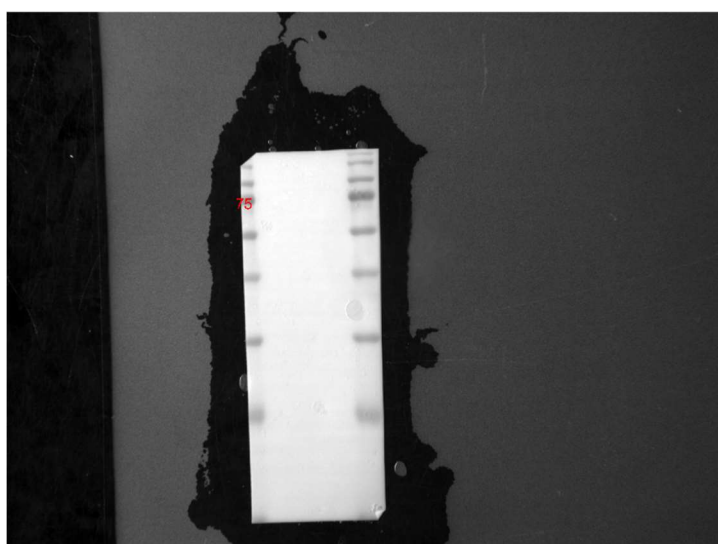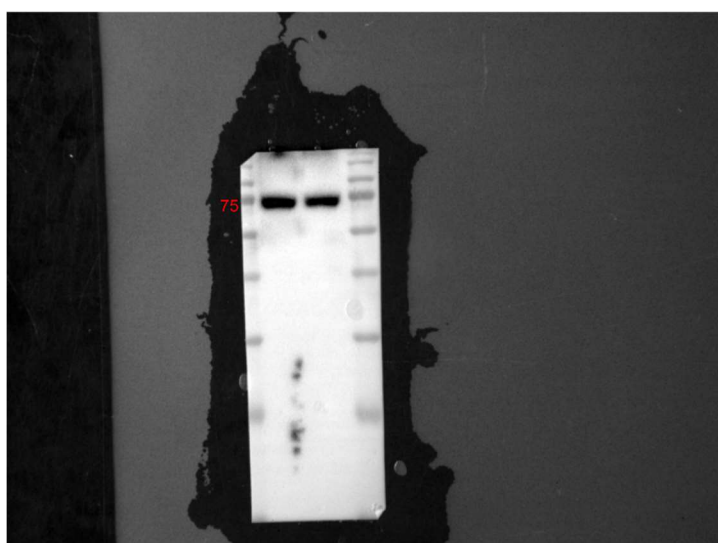

Figure 7D(p-DRP1)

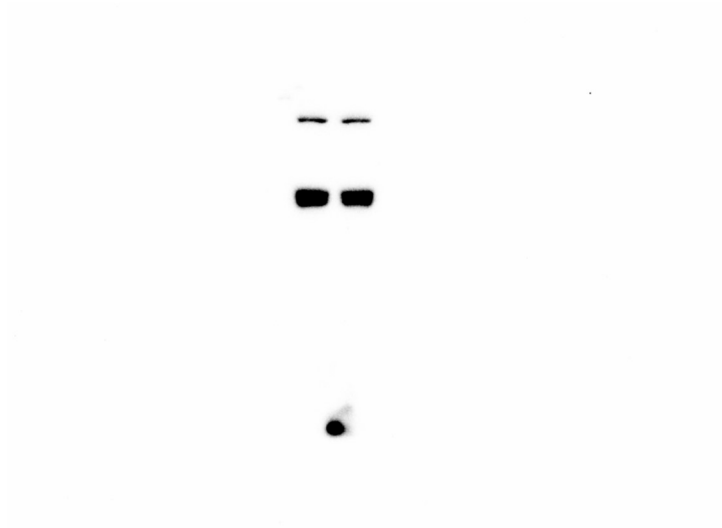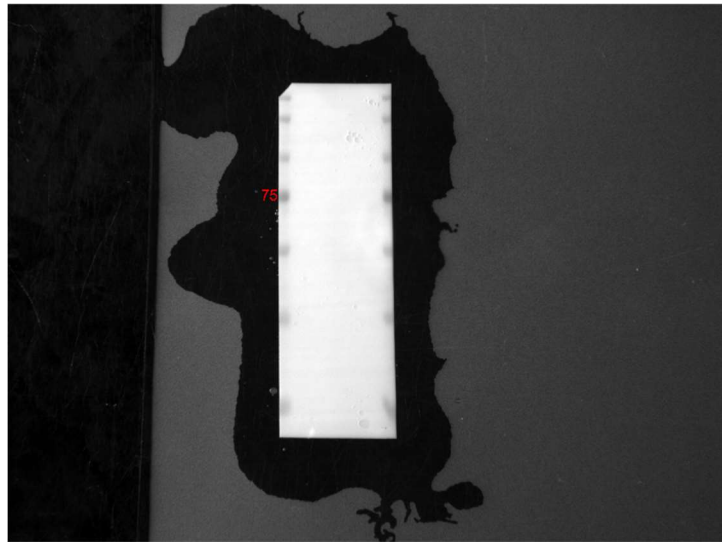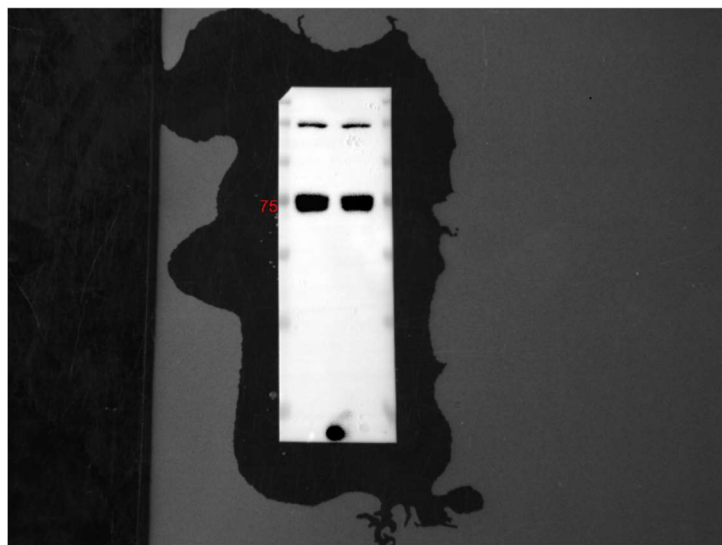

Figure 7D(ACSL1)

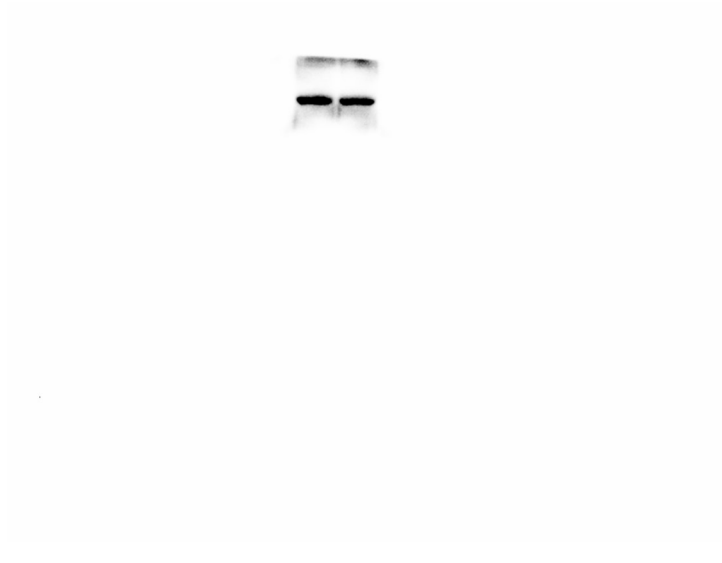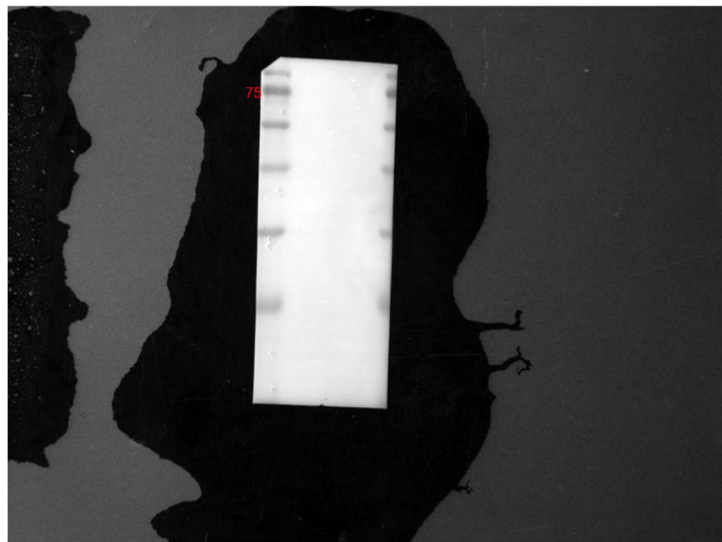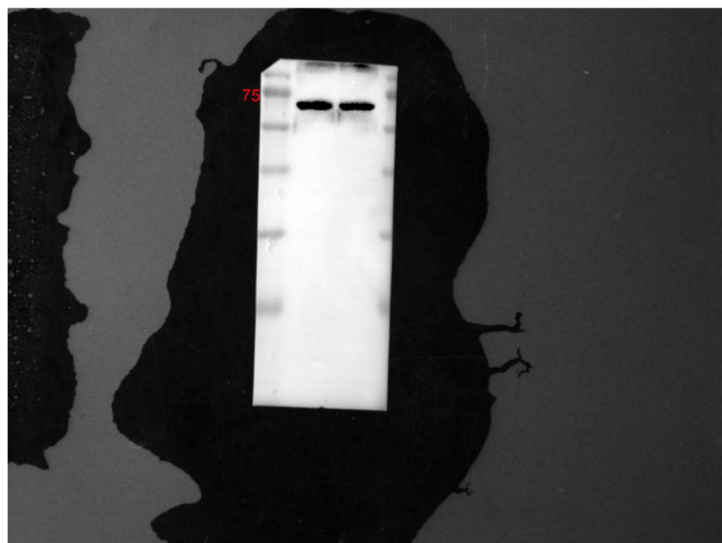

Figure 7D(AKT)

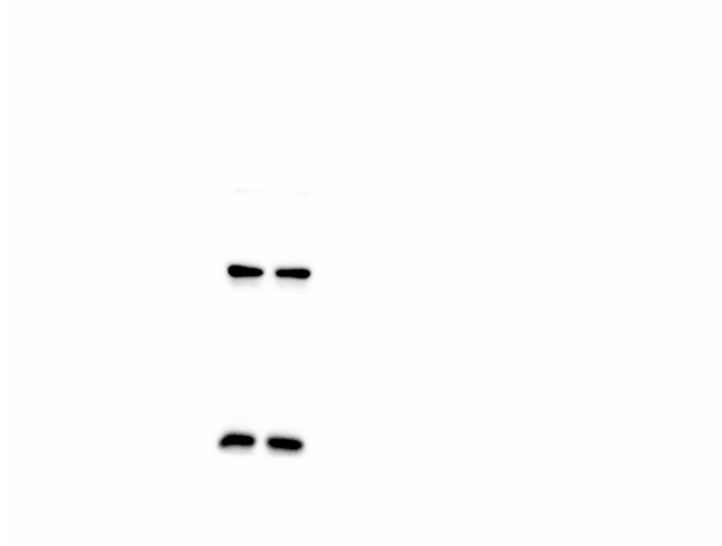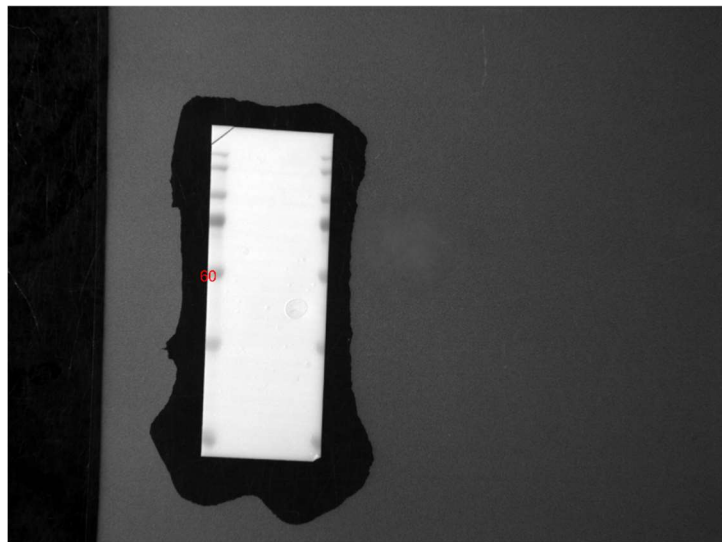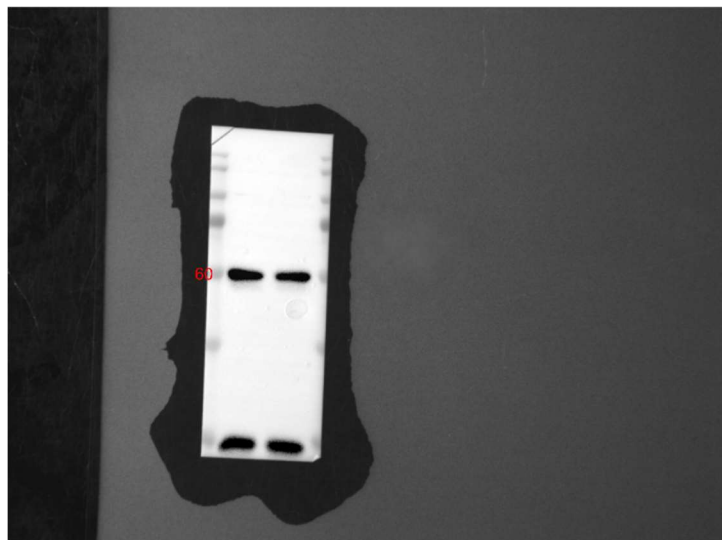

Figure 7D(p-AKT)

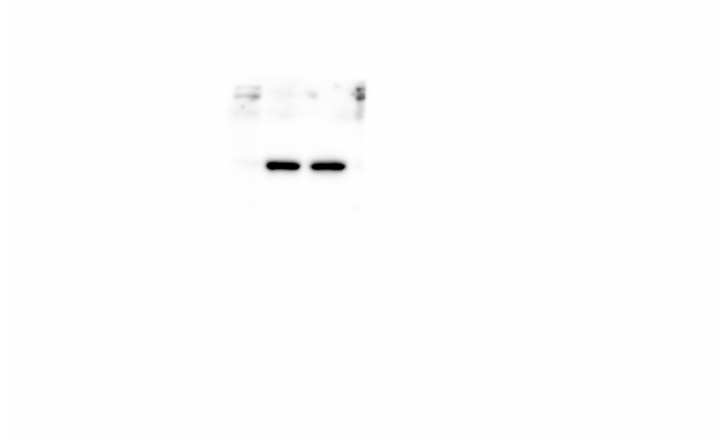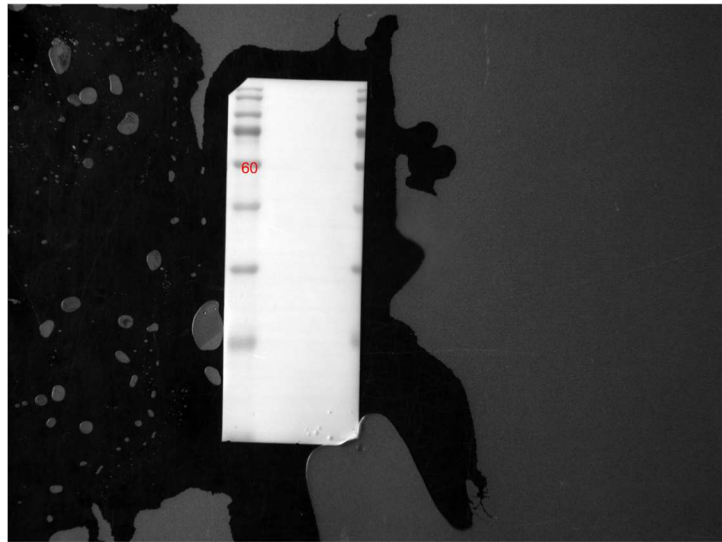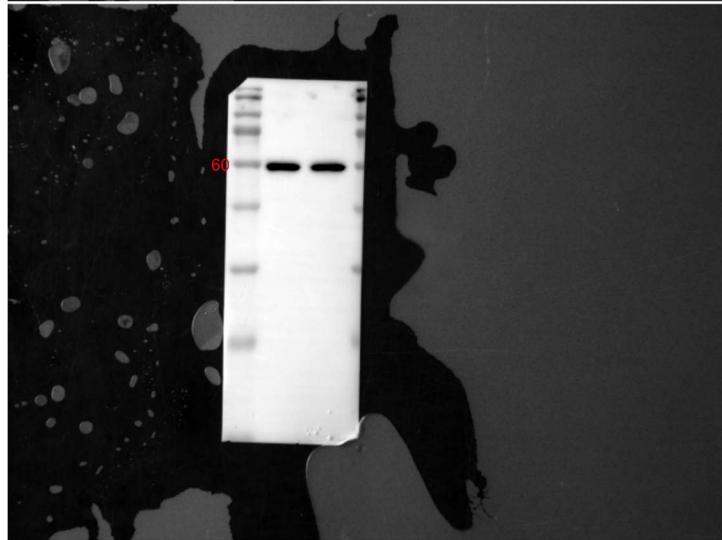

Figure 7D(tubulin)

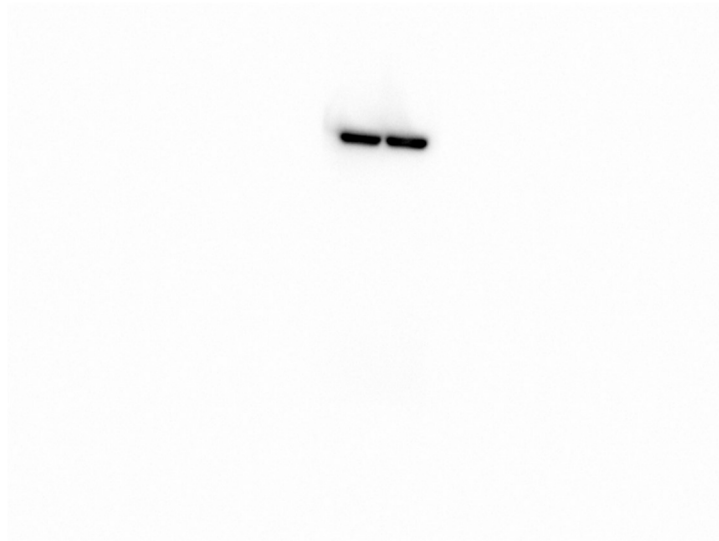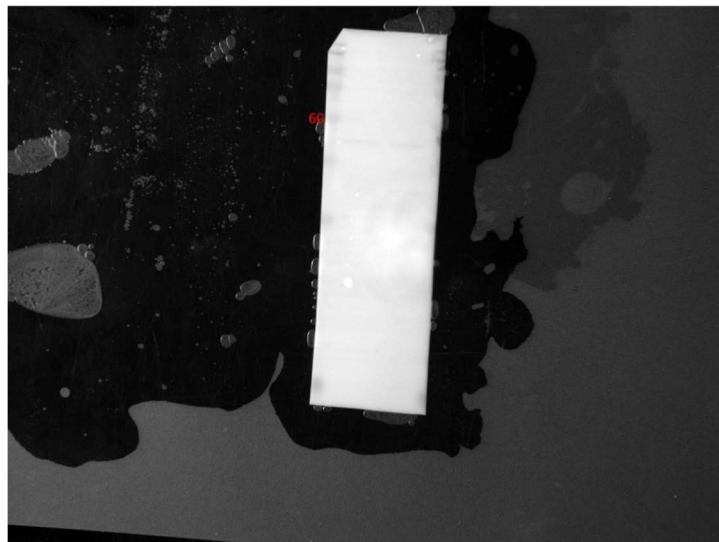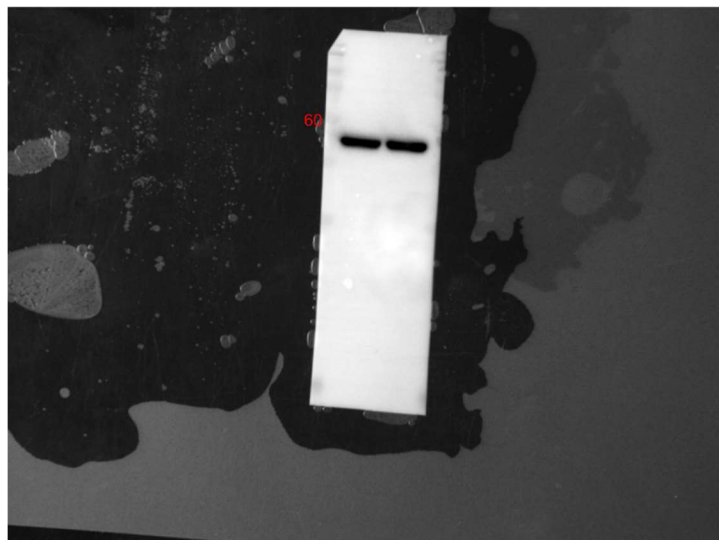

**Figure 7E(LDHA)**

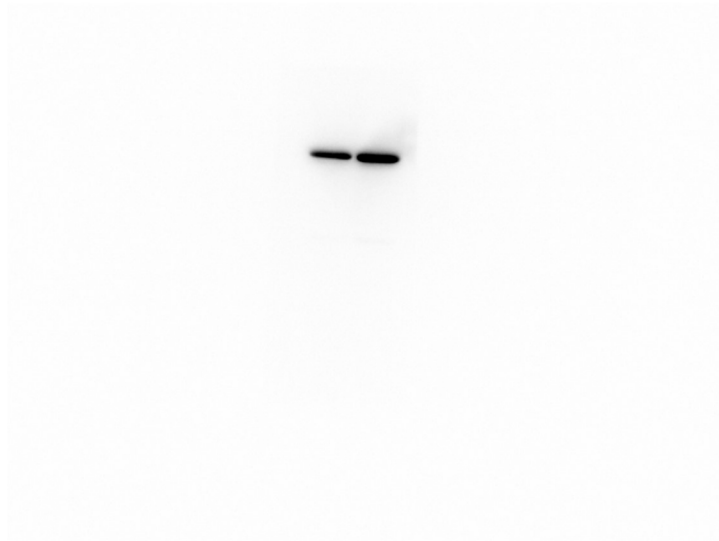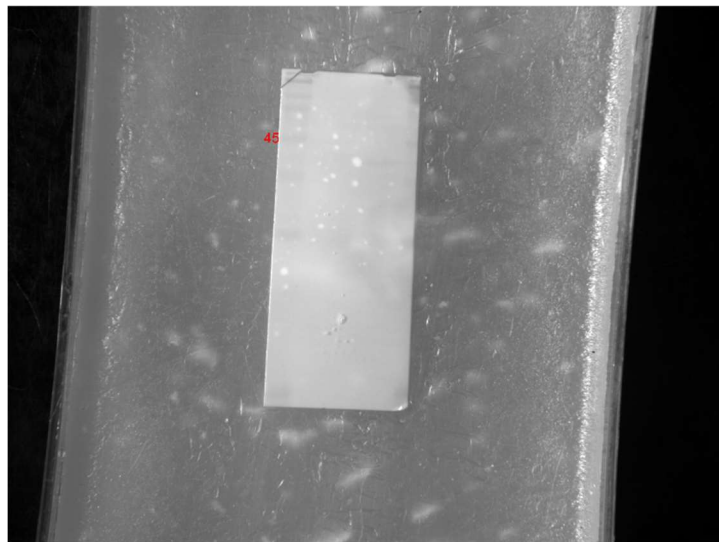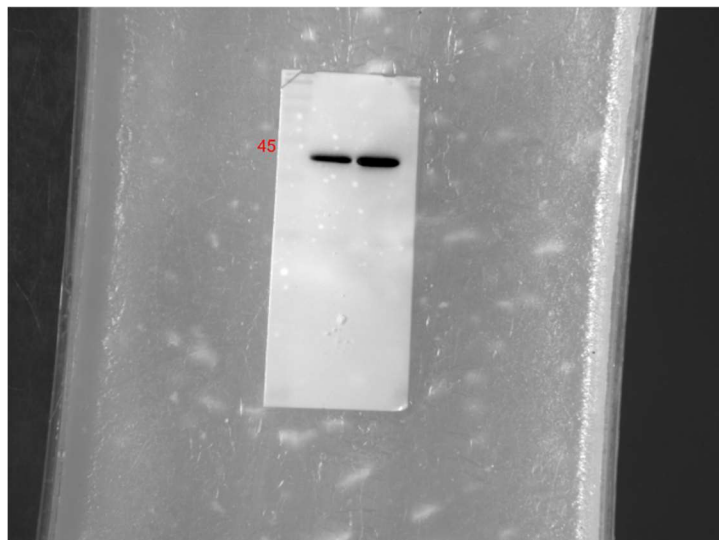

Figure 7E(ALODA)

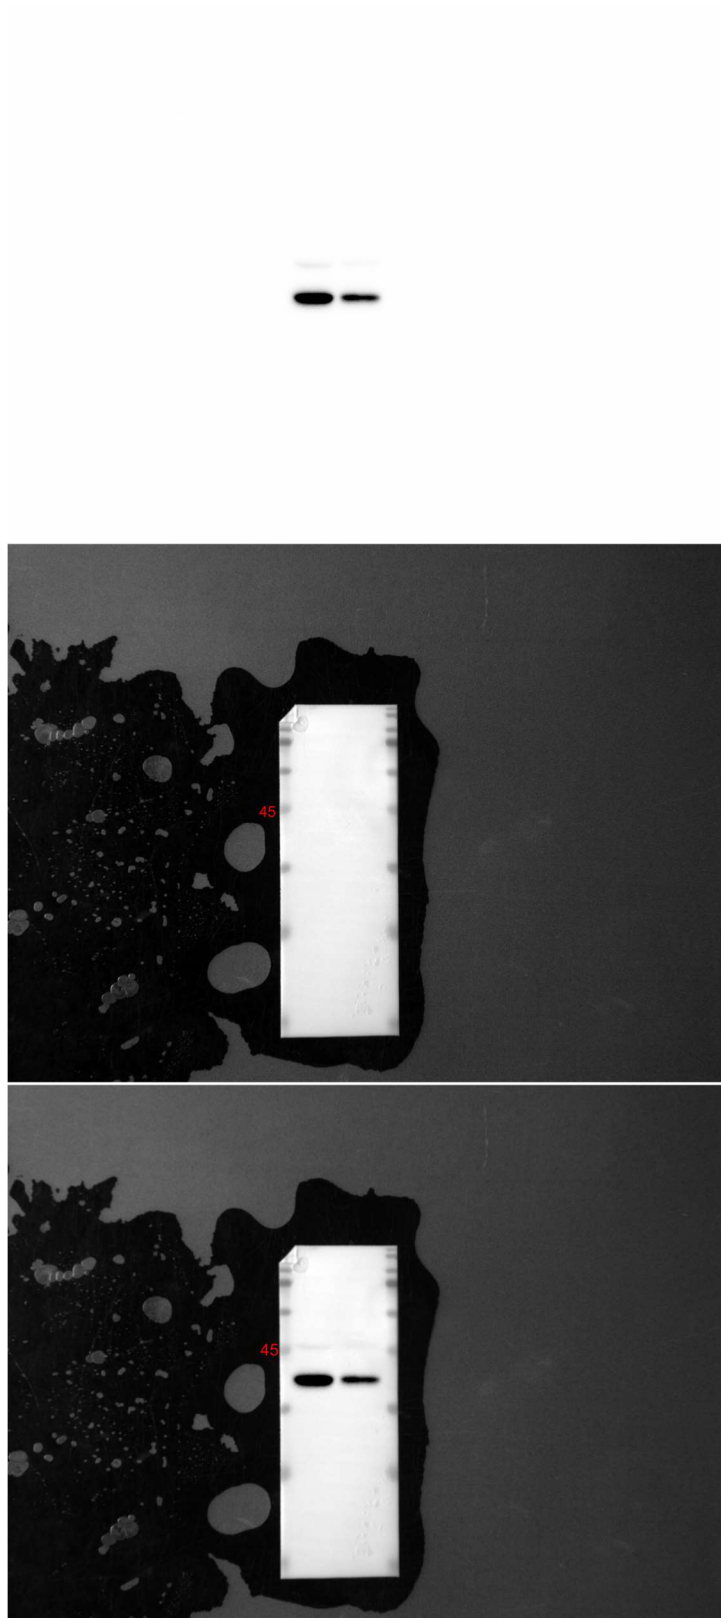

Figure 7E(p-PDHK1)

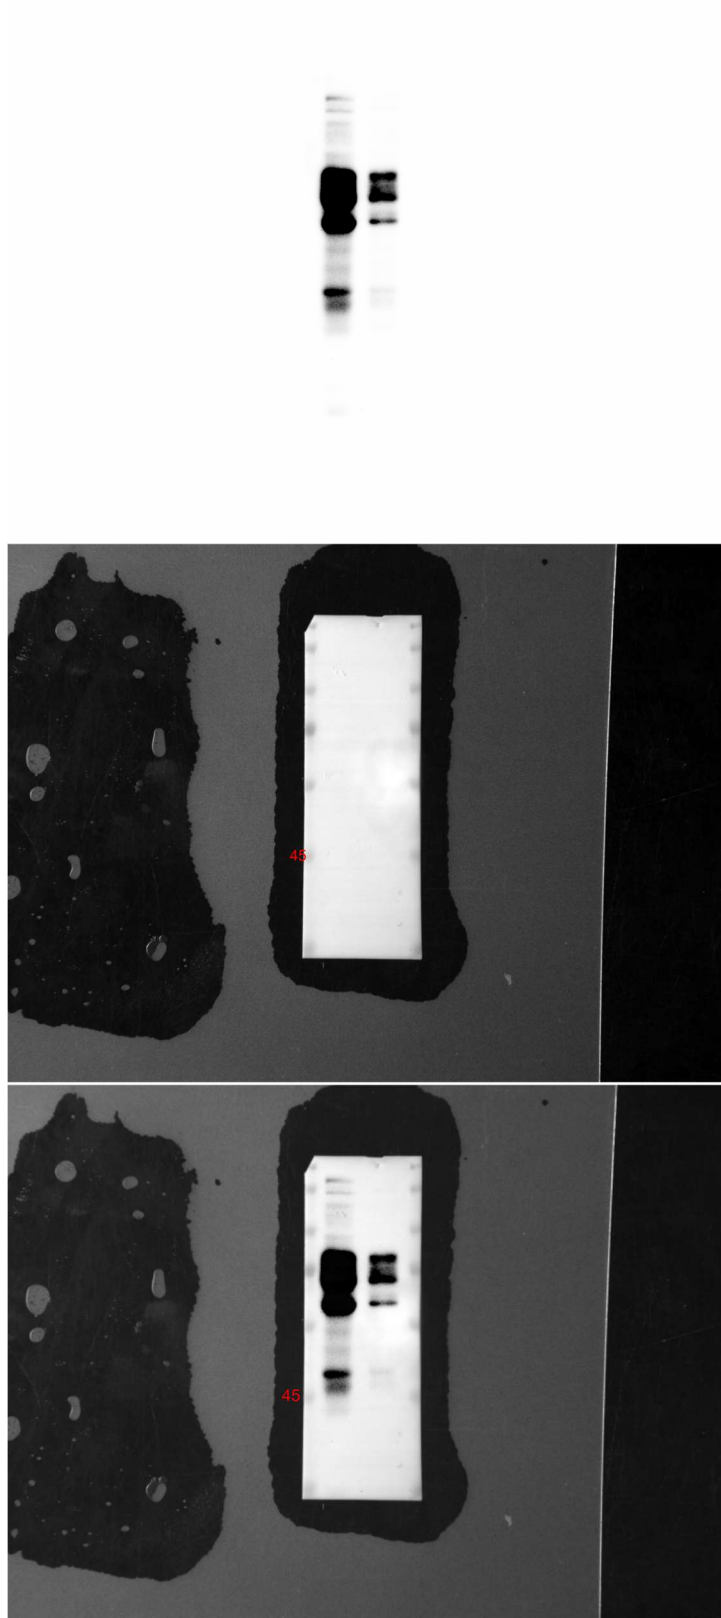

Figure 7E(HK2)

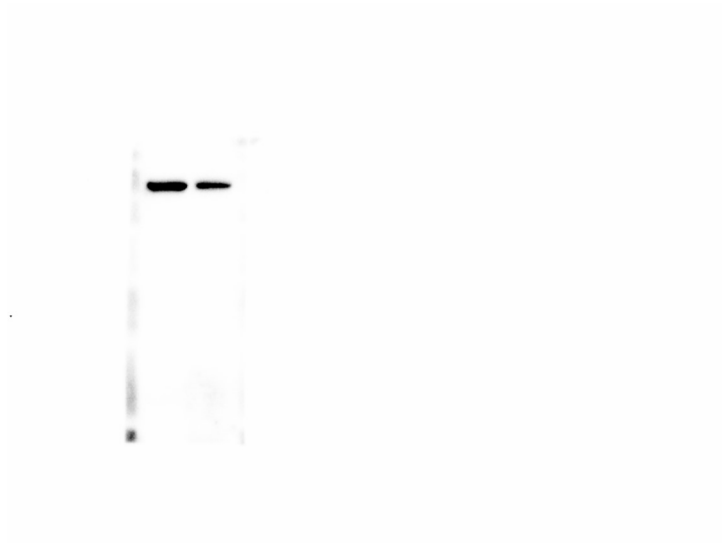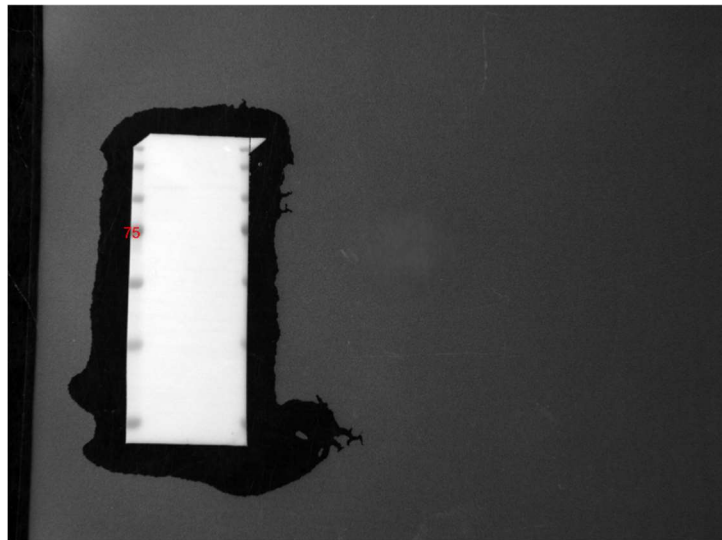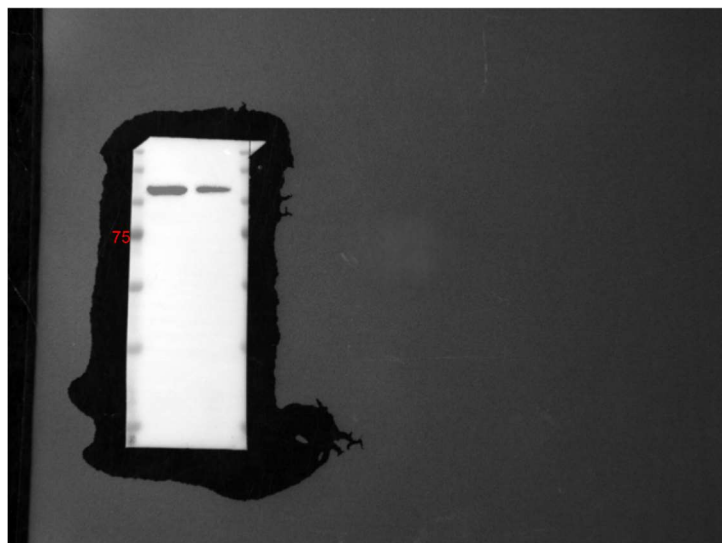

Figure 7E(ACLY)

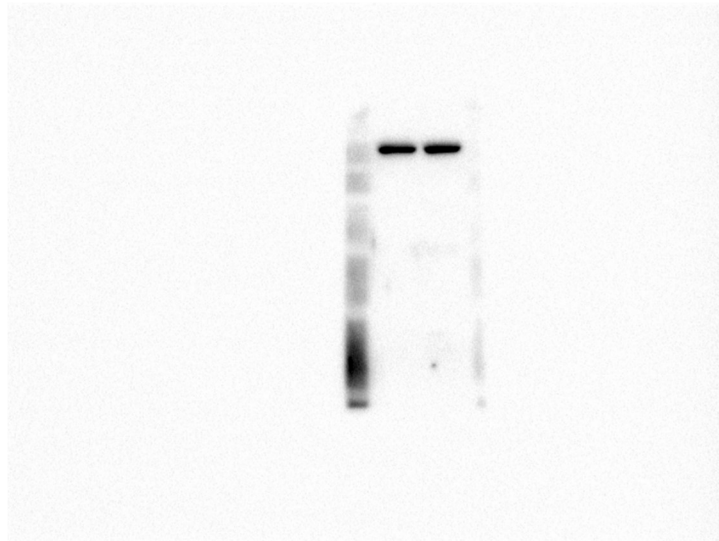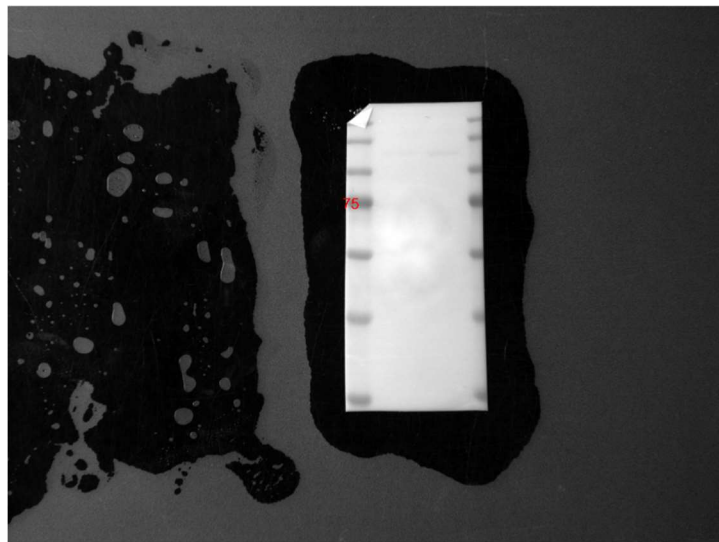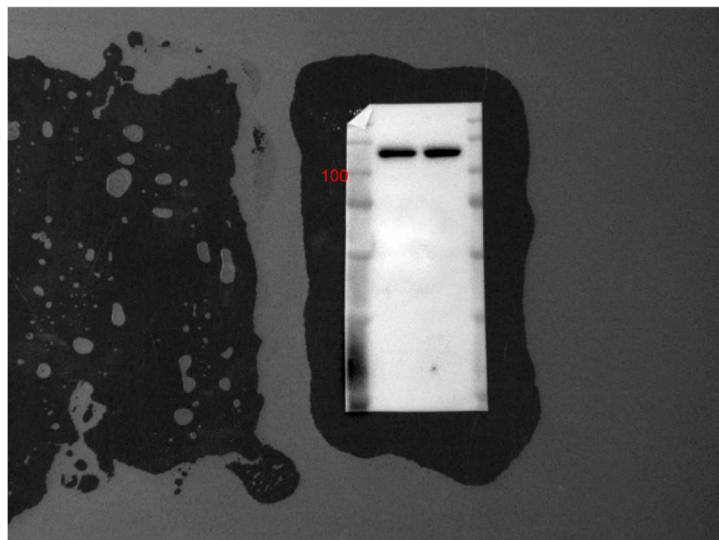

Figure 7E(p-ACLY)

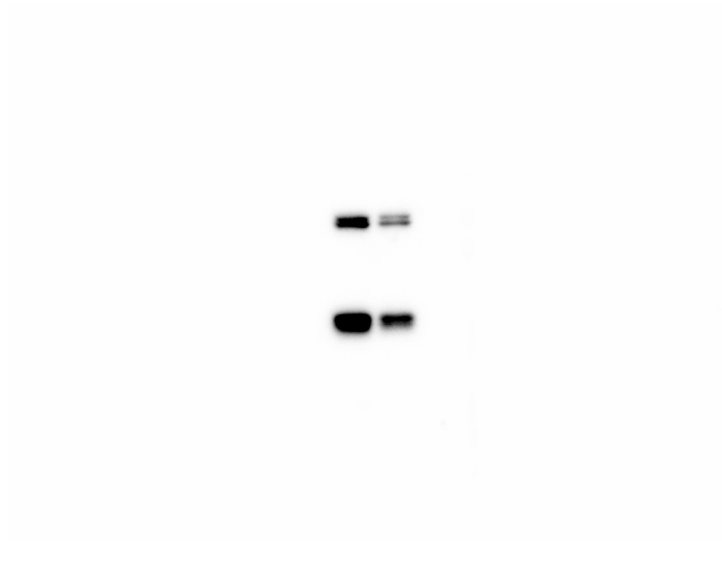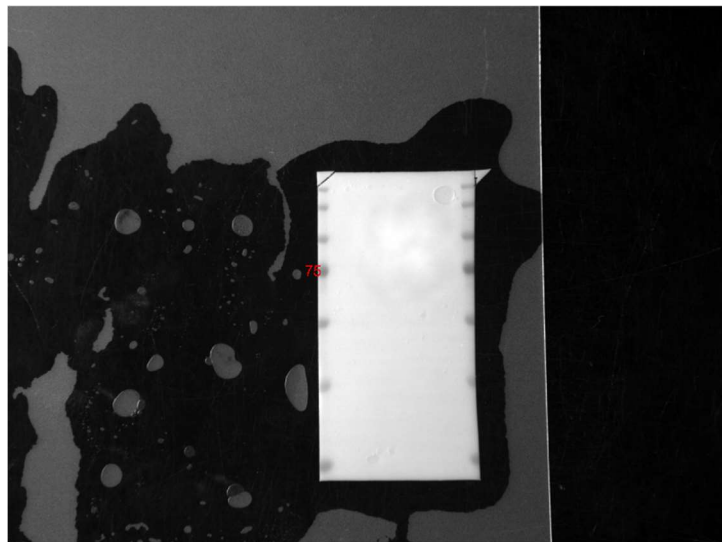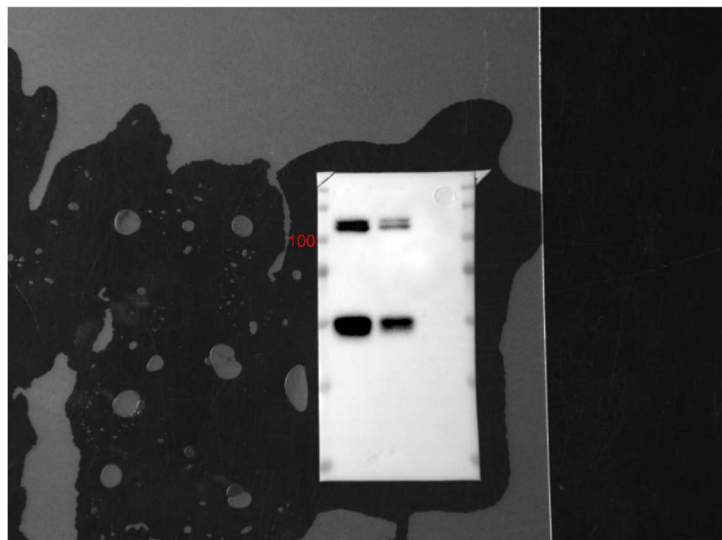

Figure 7E(Tubulin)

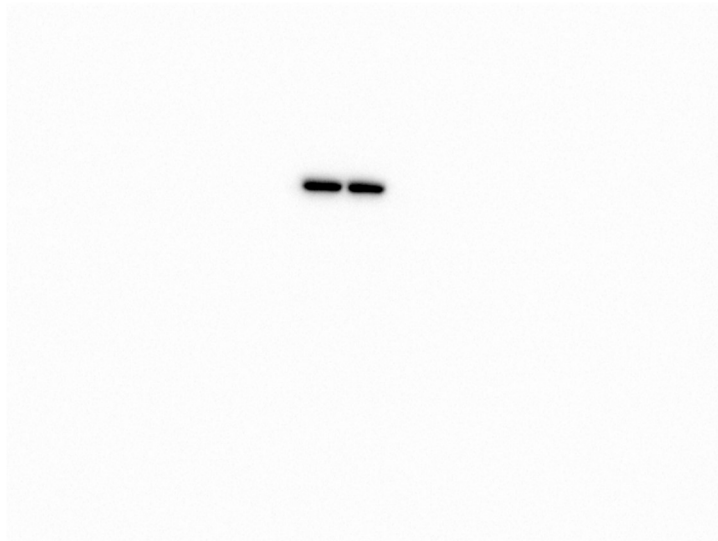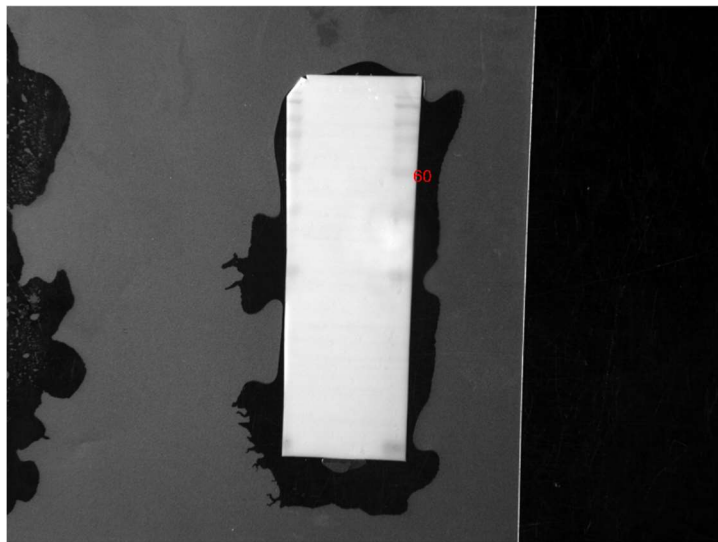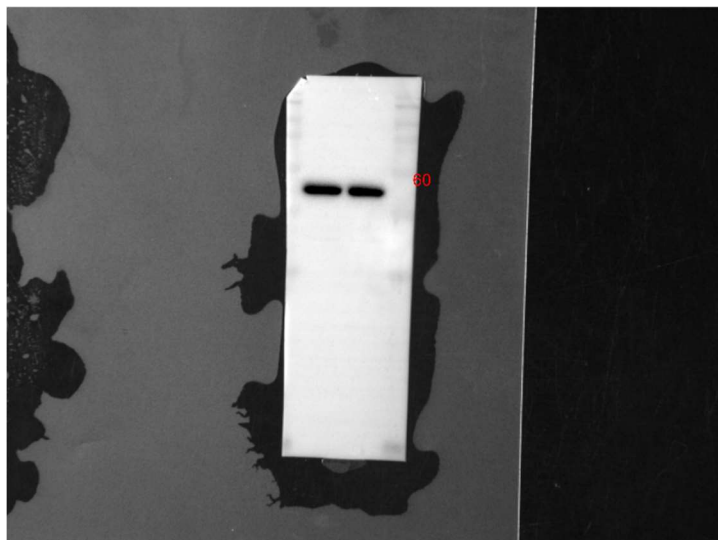

Figure 8E(CDK1)

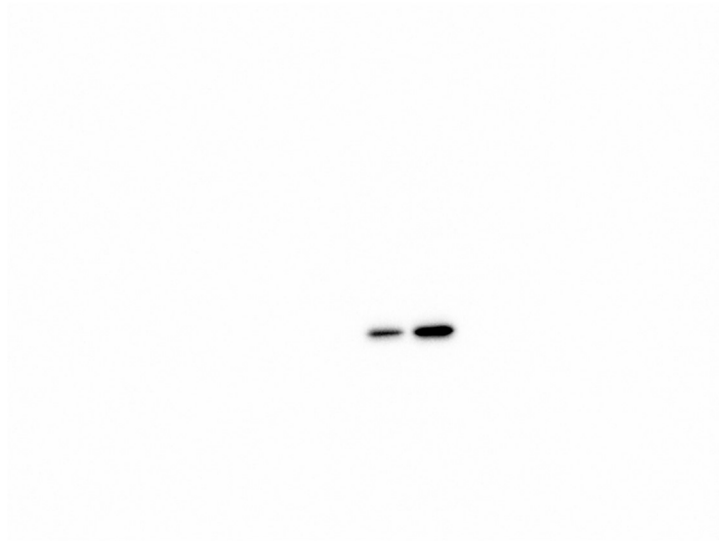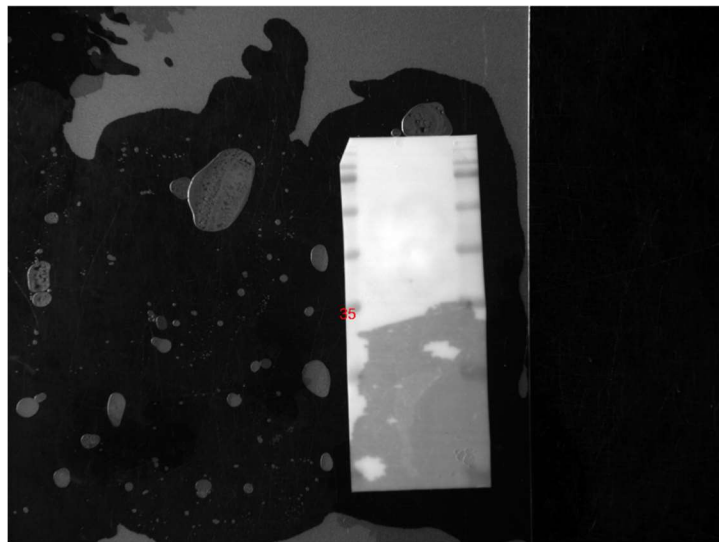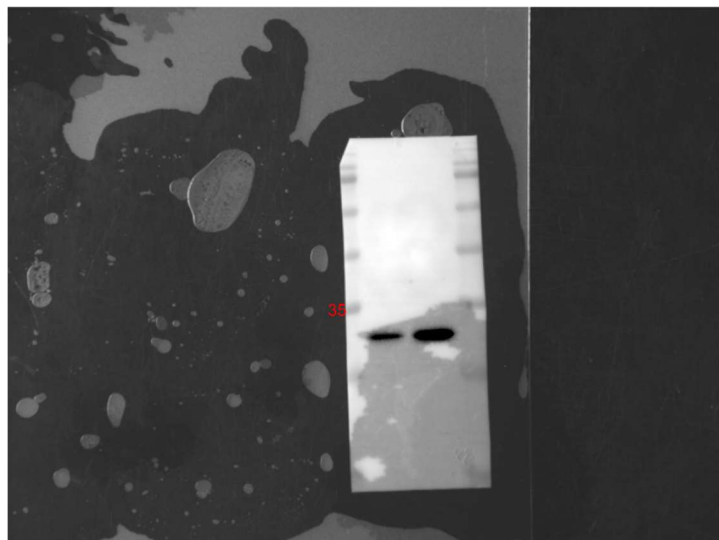

**Figure 8E(CDK2)**

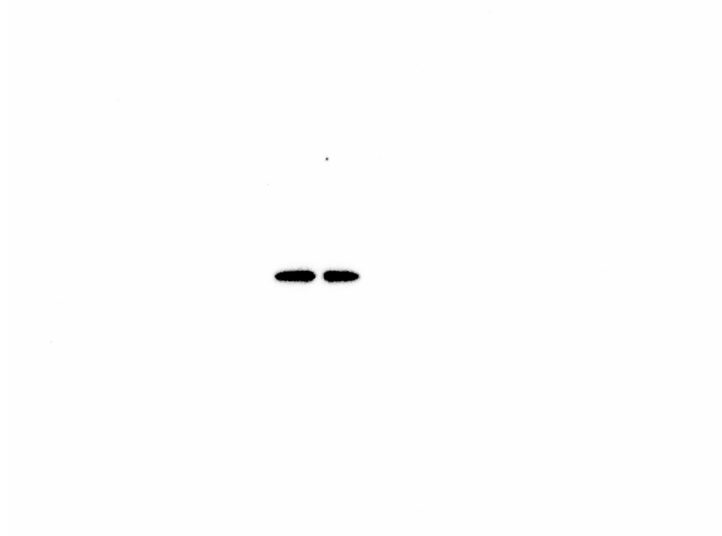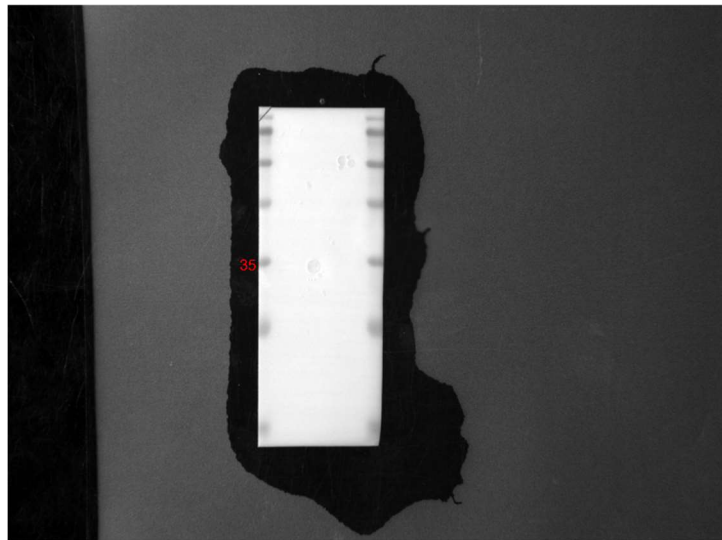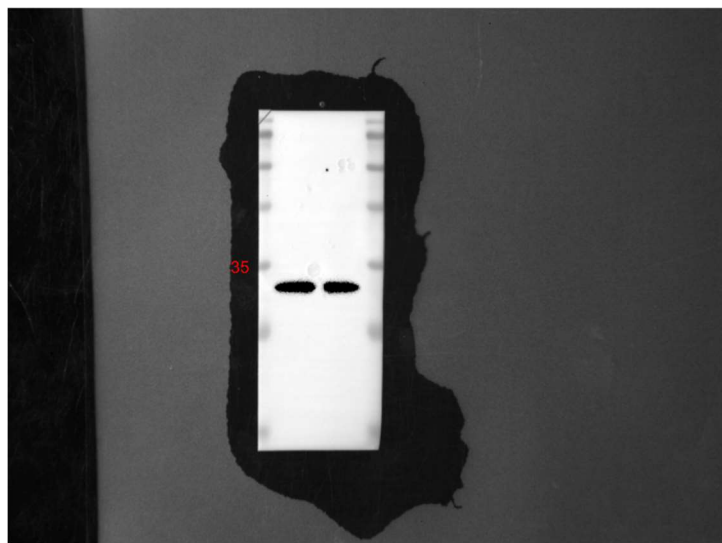

**Figure 8E(CDK4)**

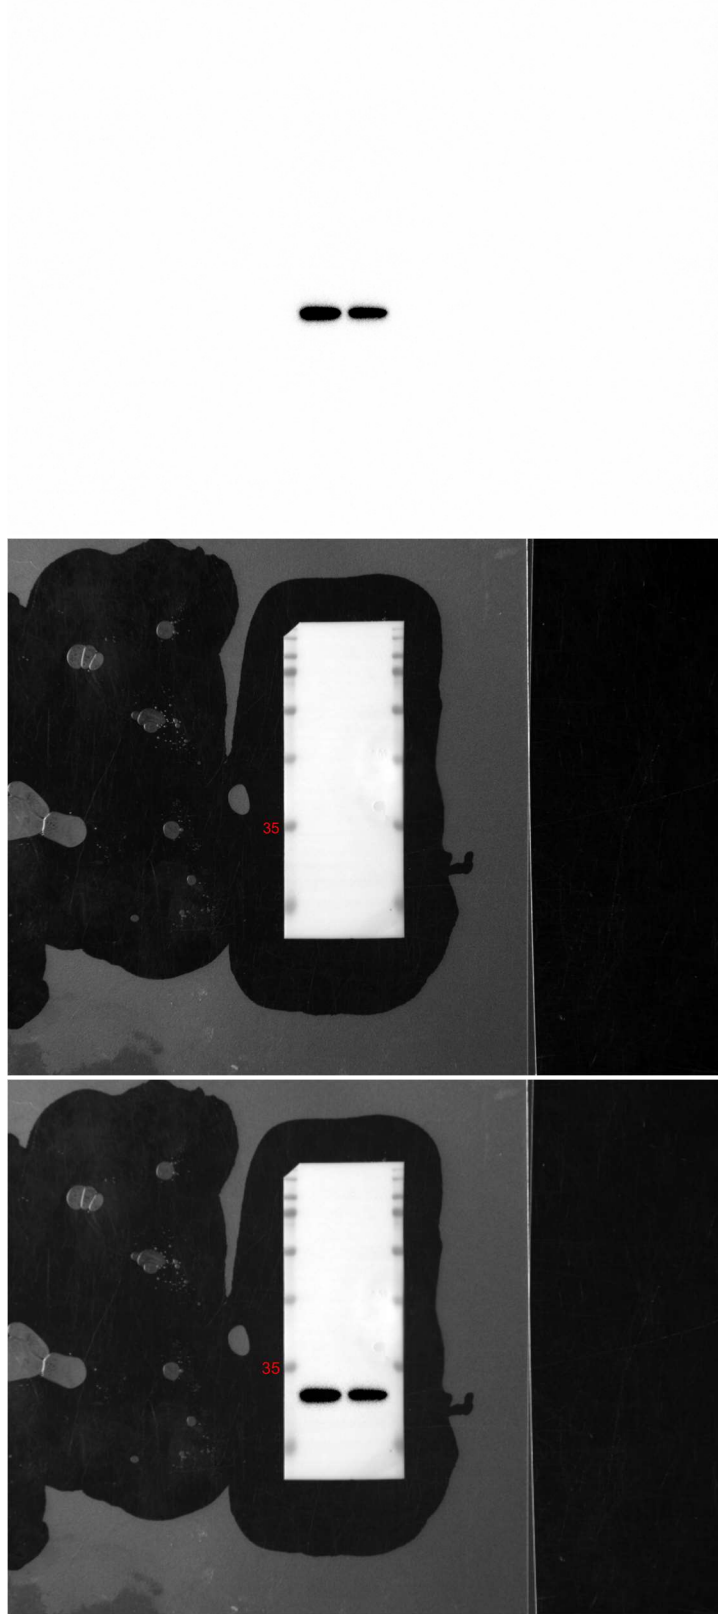

Figure 8E(CDK6)

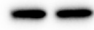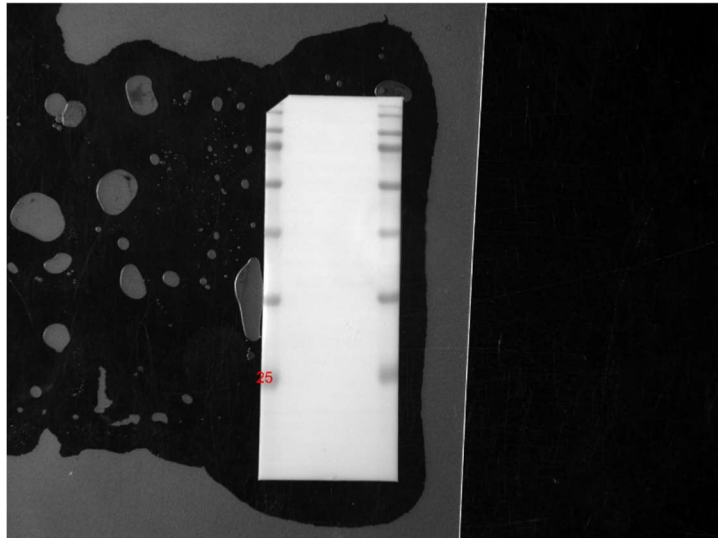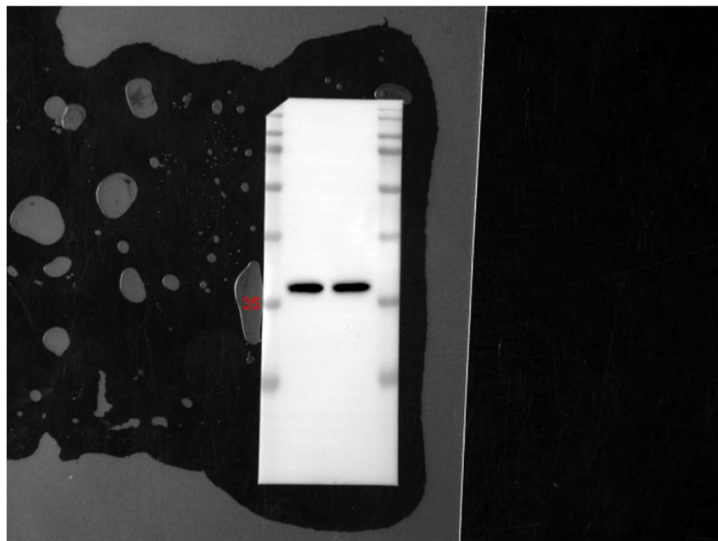

Figure 8E(CDK7)

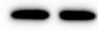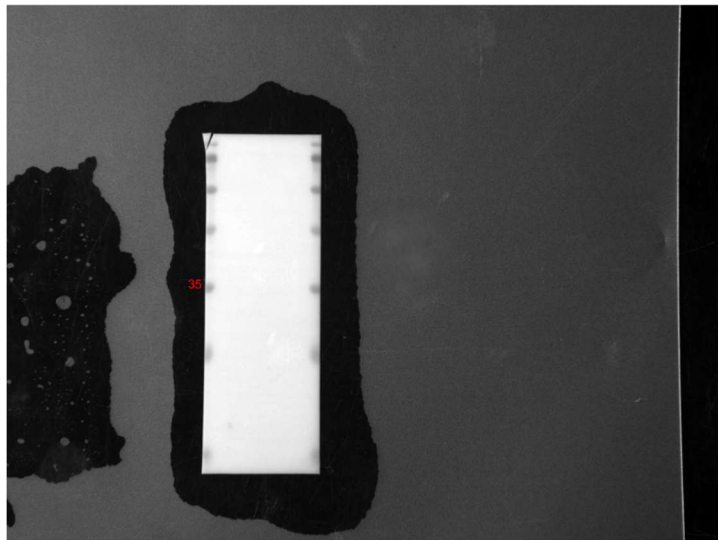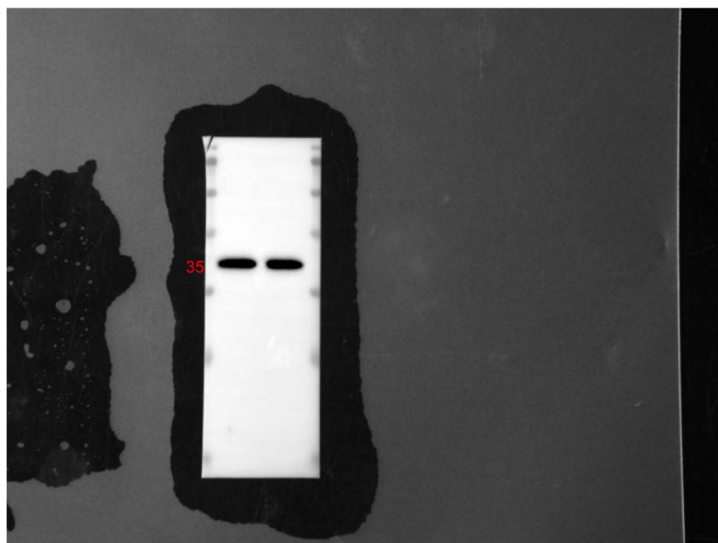

Figure 8E(CDK9)

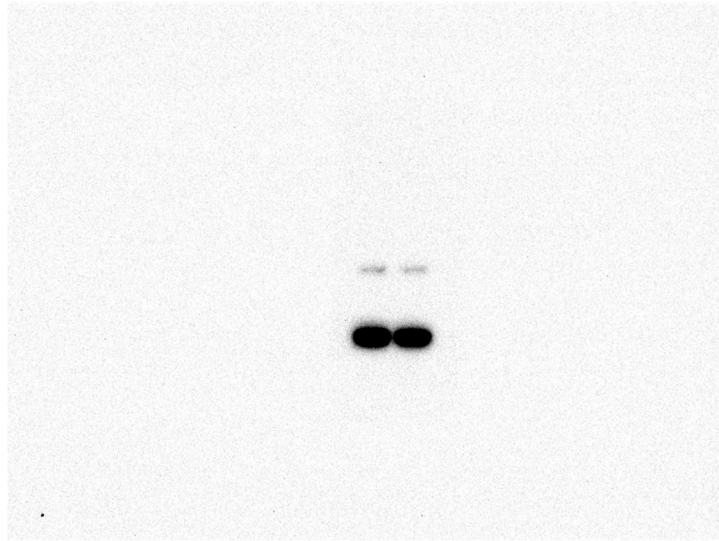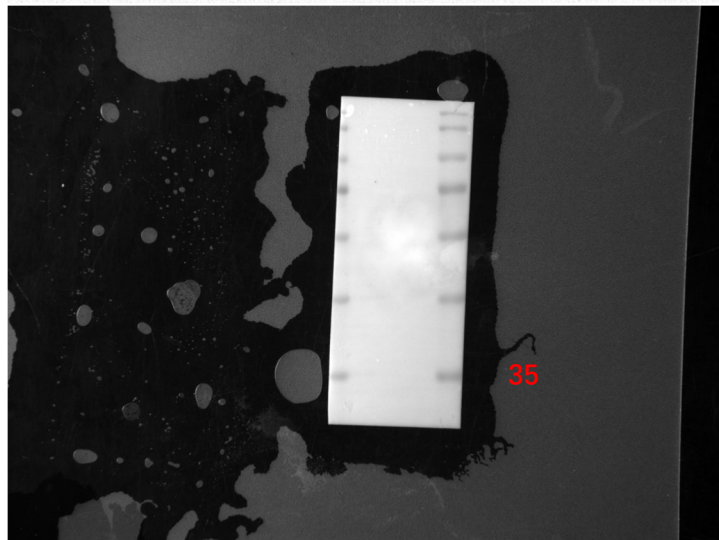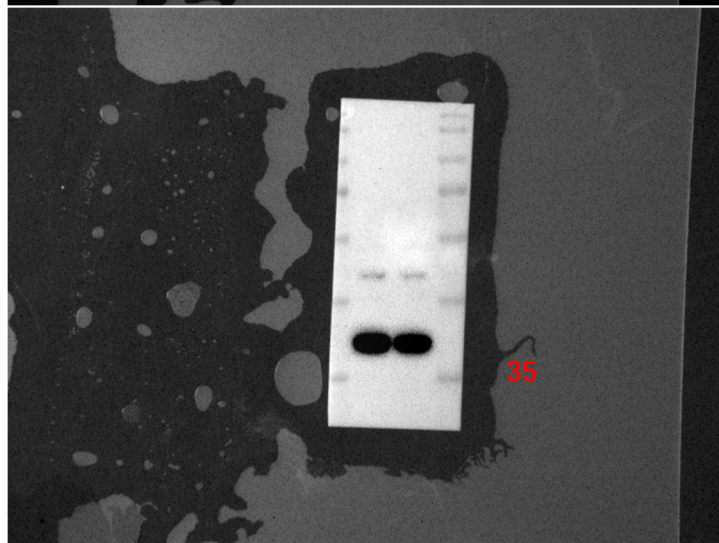

**Figure 8E(Tubulin)**

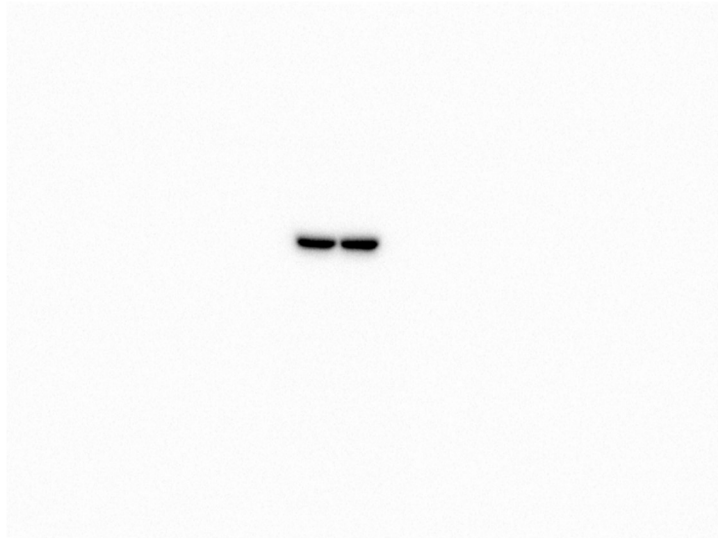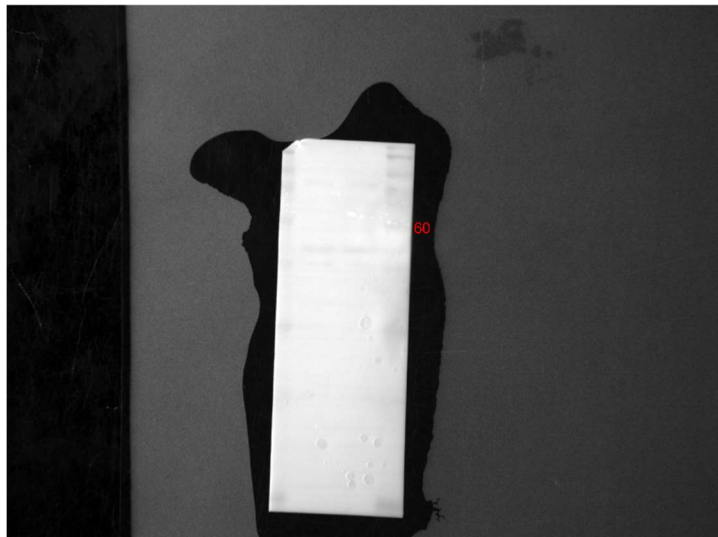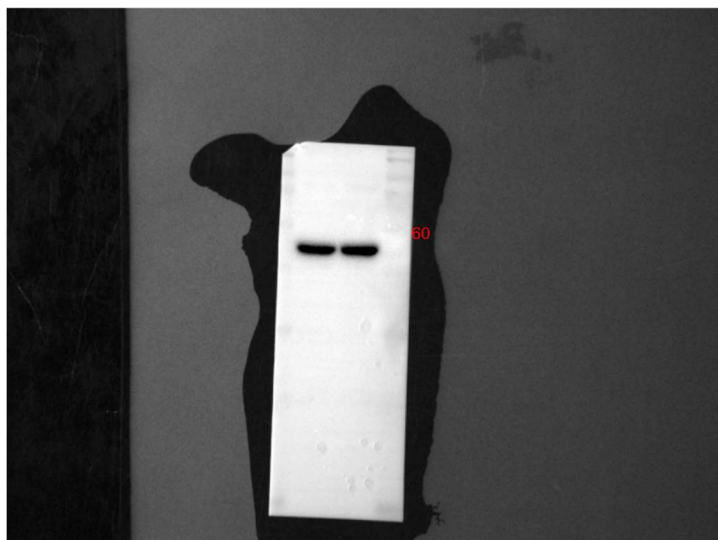

Figure 8E(P65)

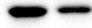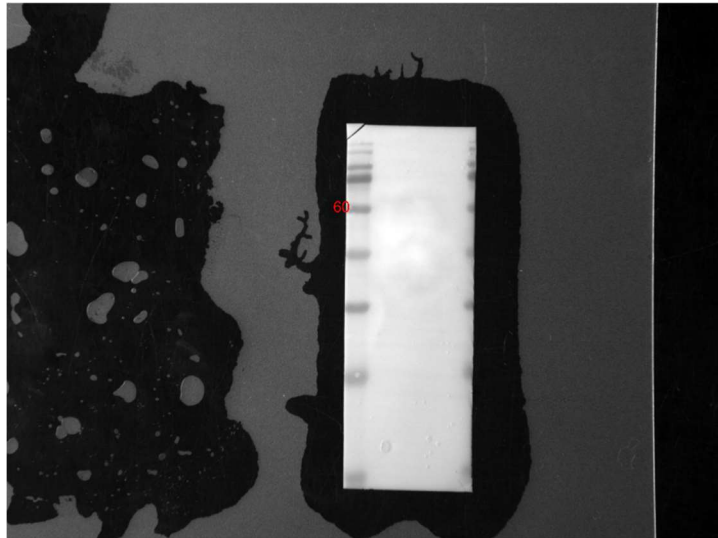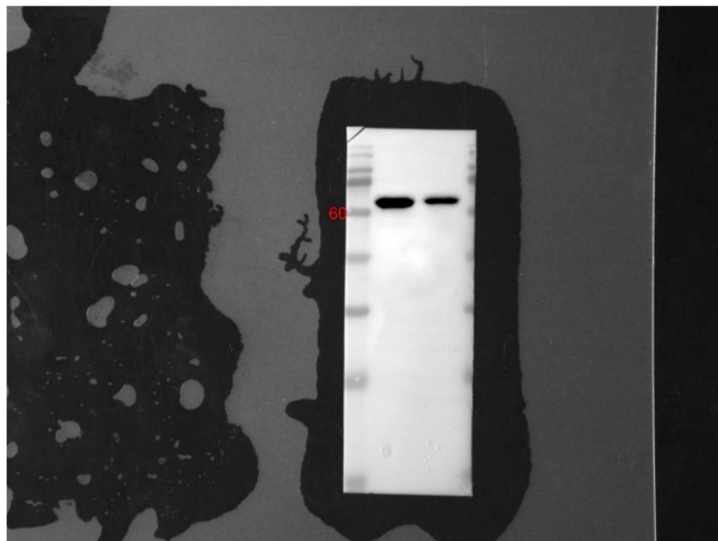

Figure 8E(Bcl2)

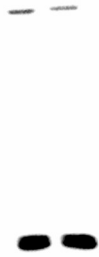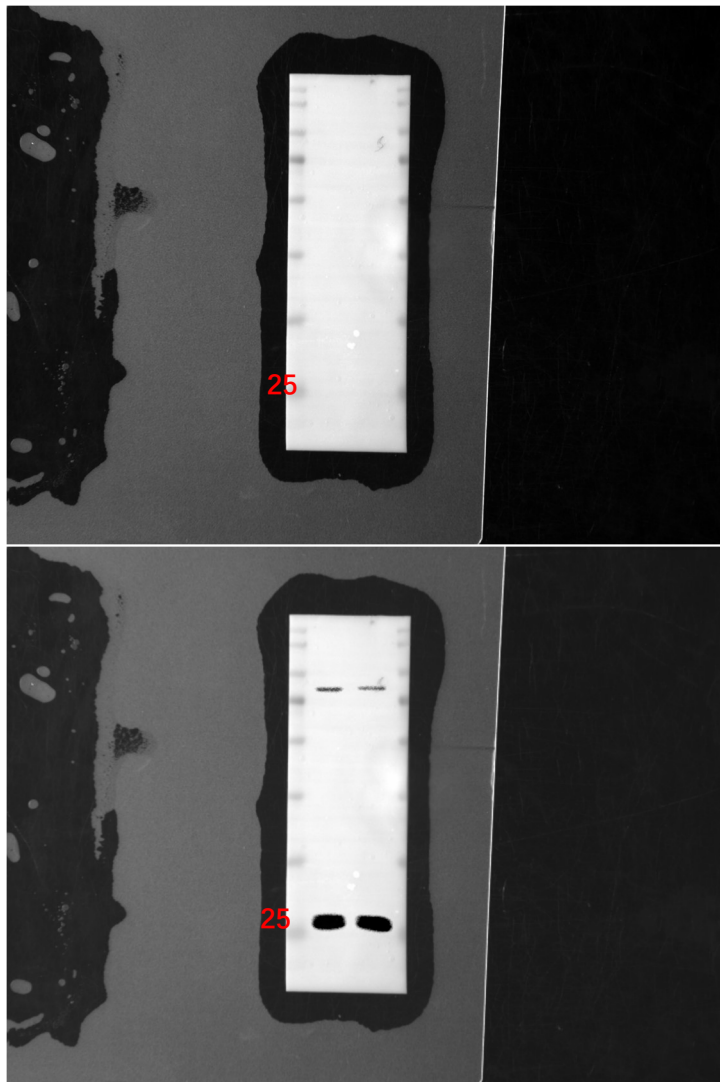

Figure 8E(Caspase3)

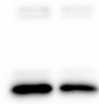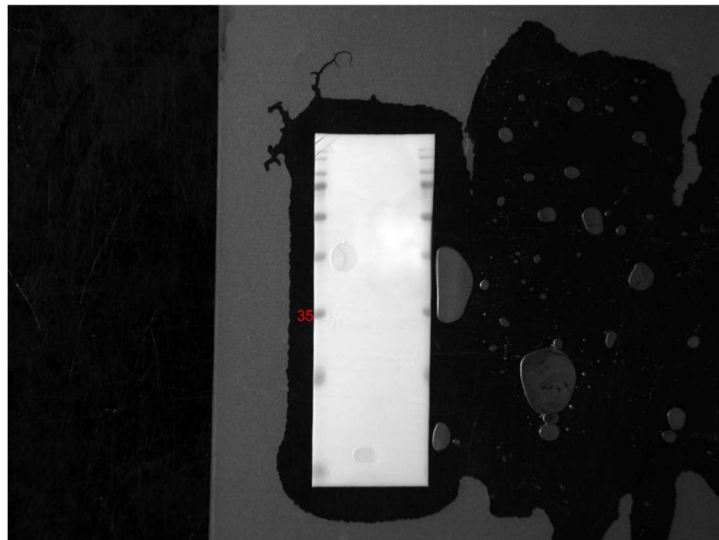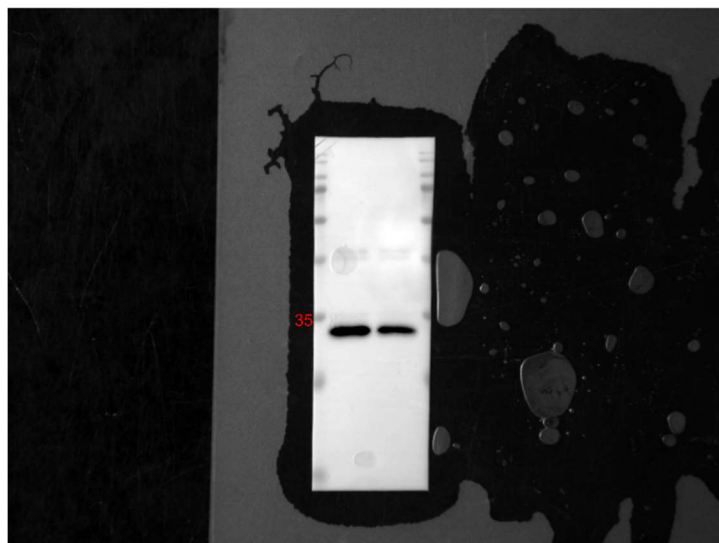

Figure 8E(P53)

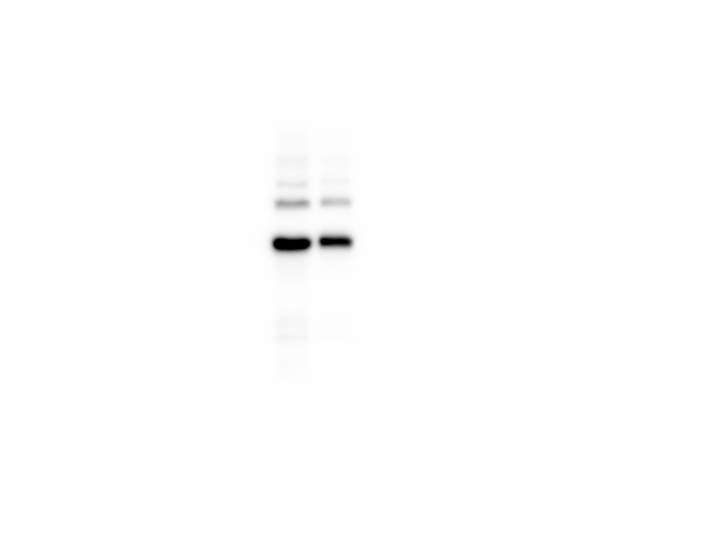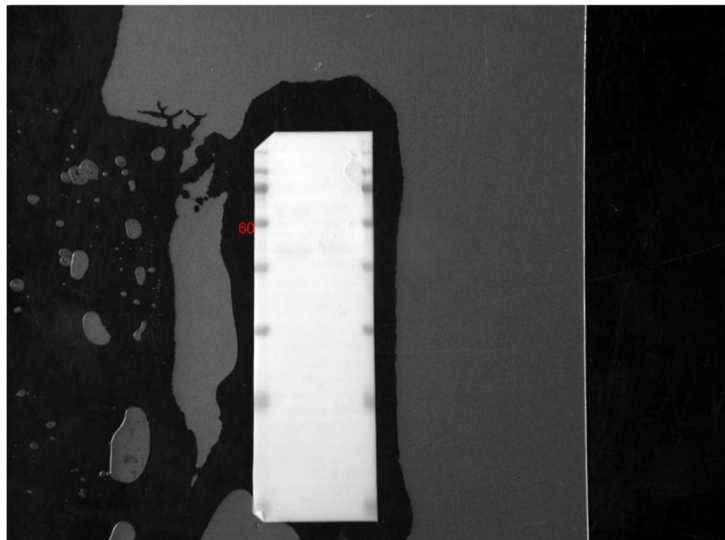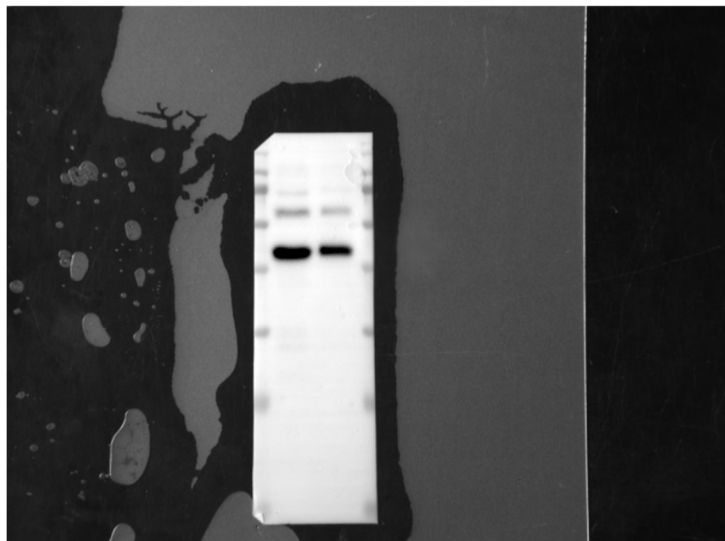

Figure 8E(p-Erk)

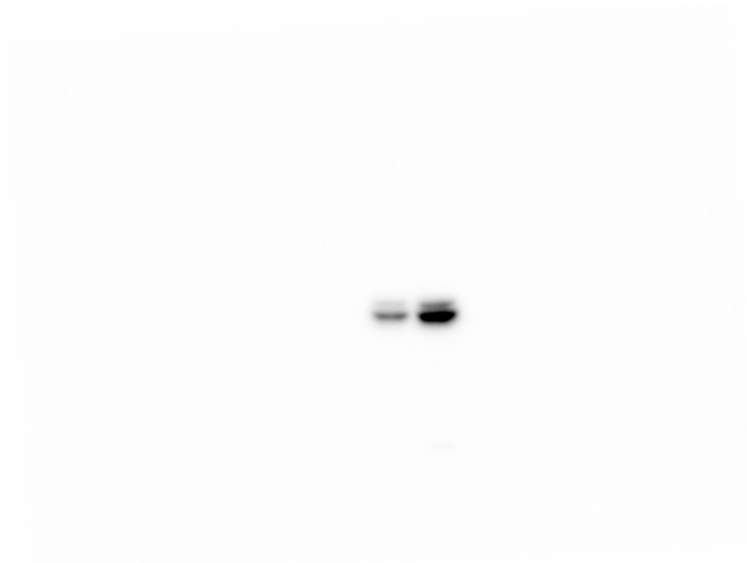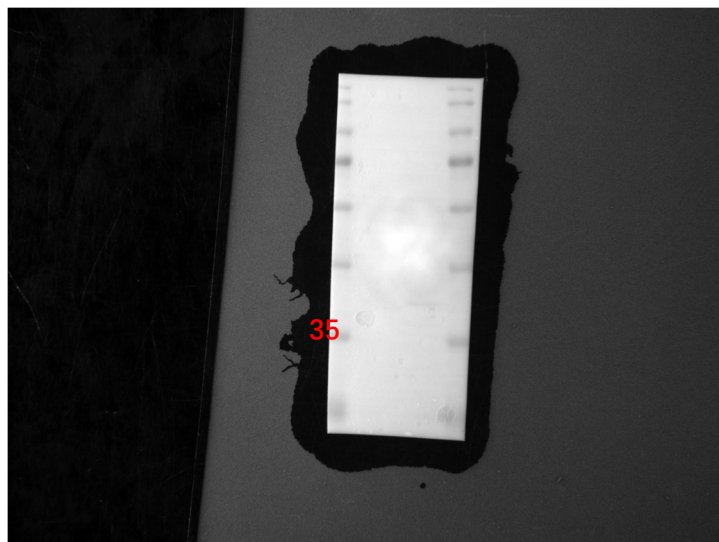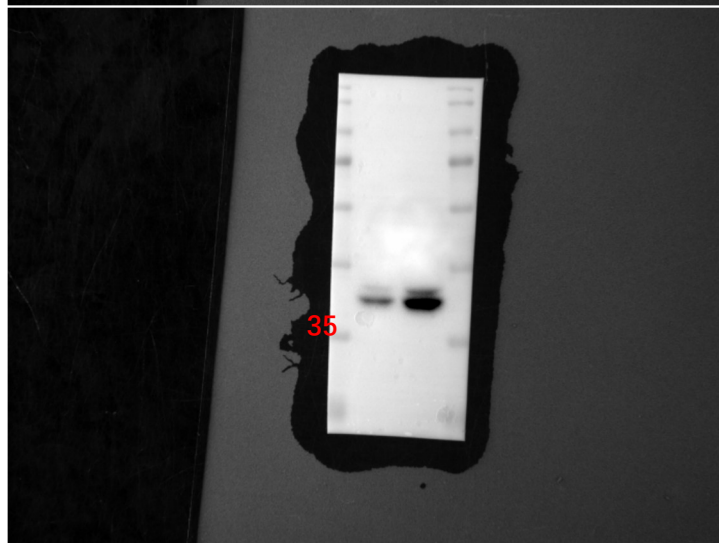

Figure 8E(Erk)

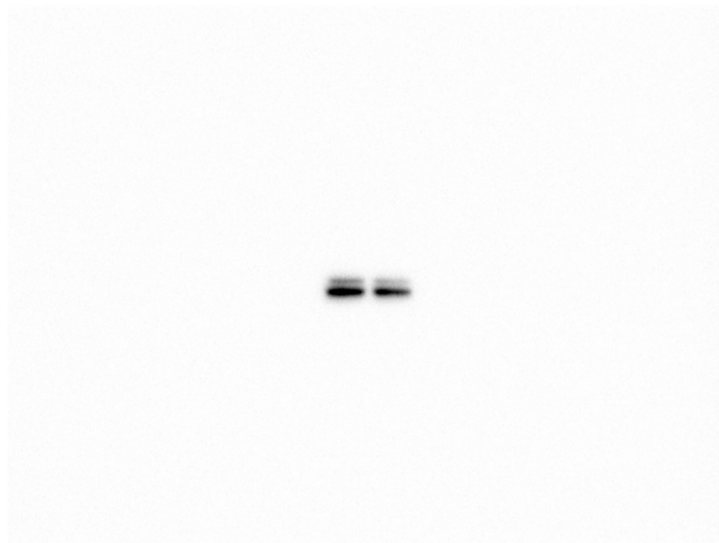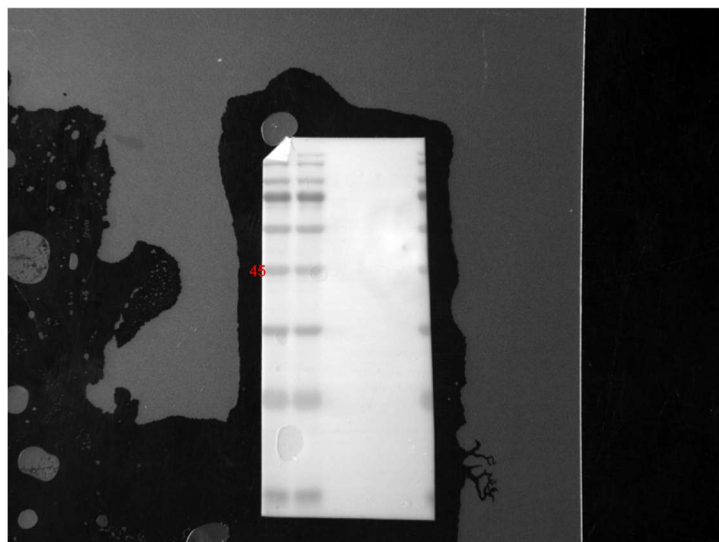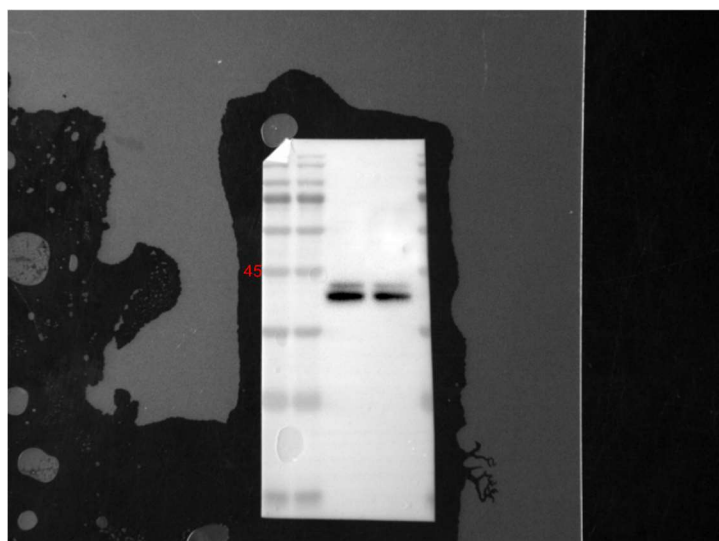

Figure 8E(Tubulin)

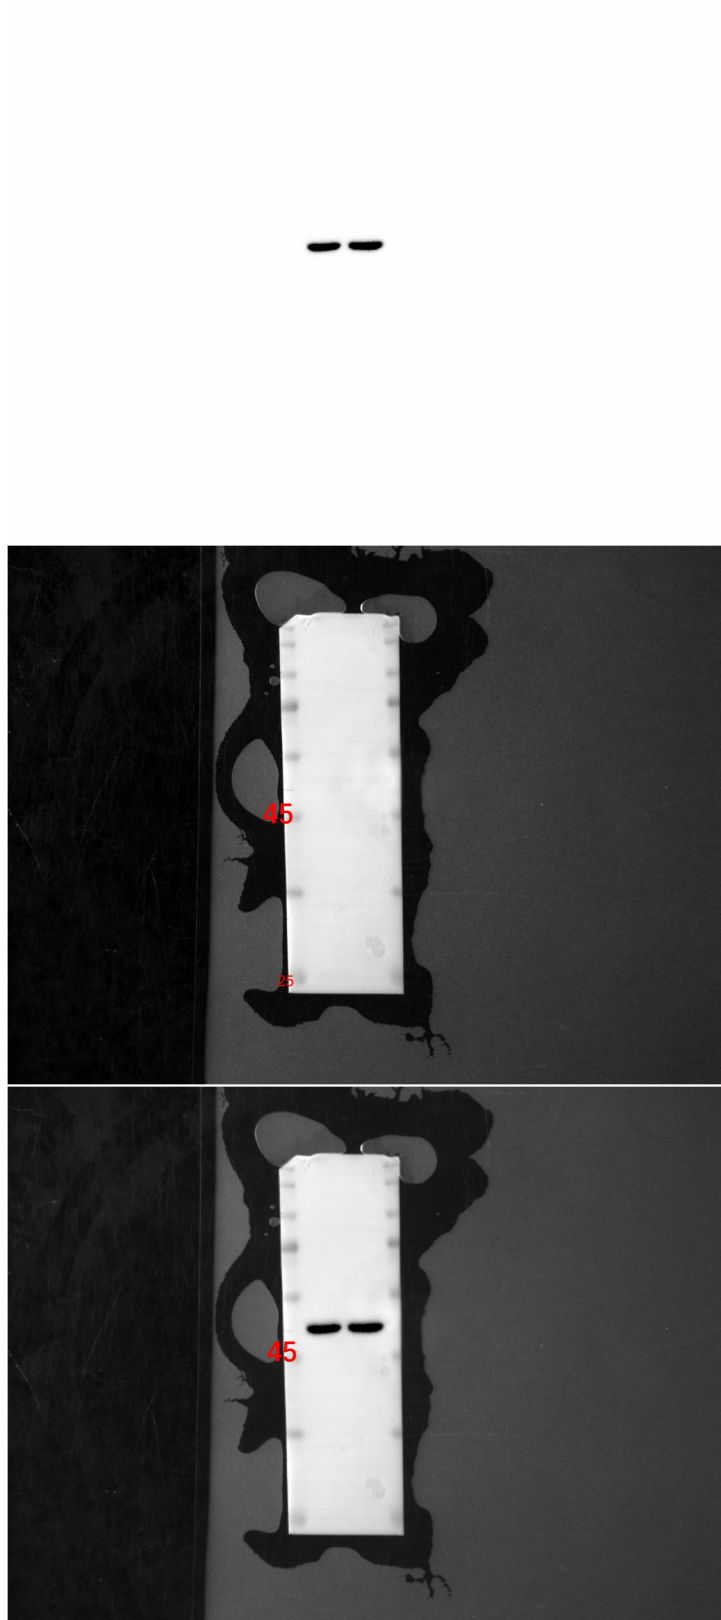

Figure 8F(CDK1)

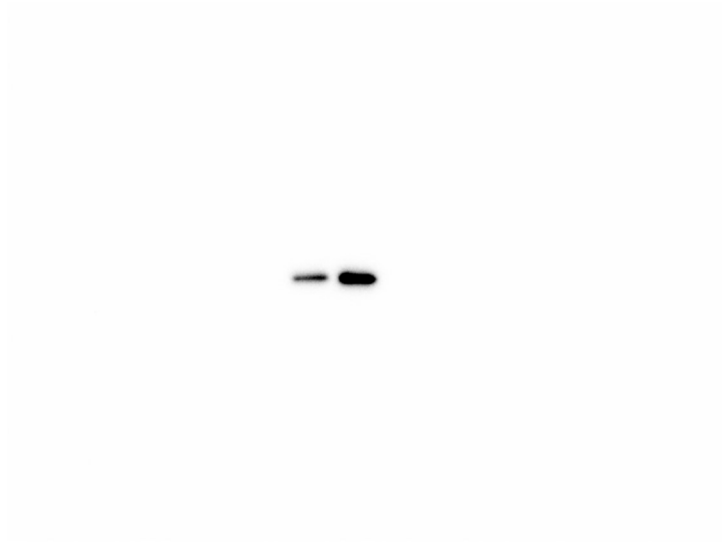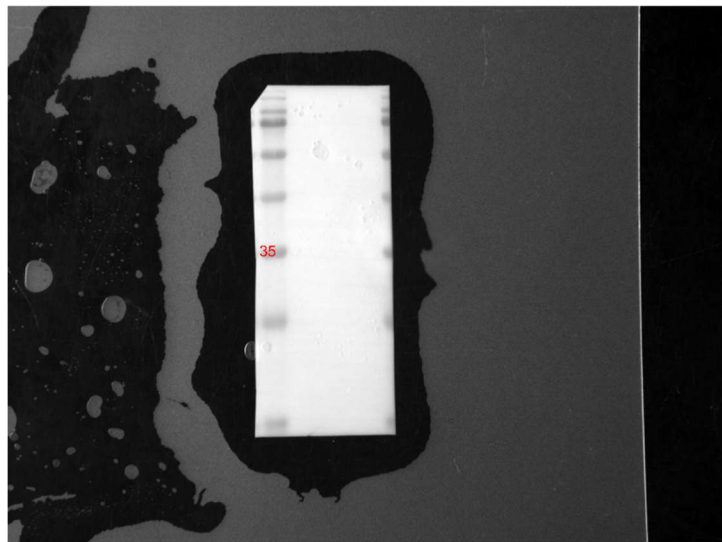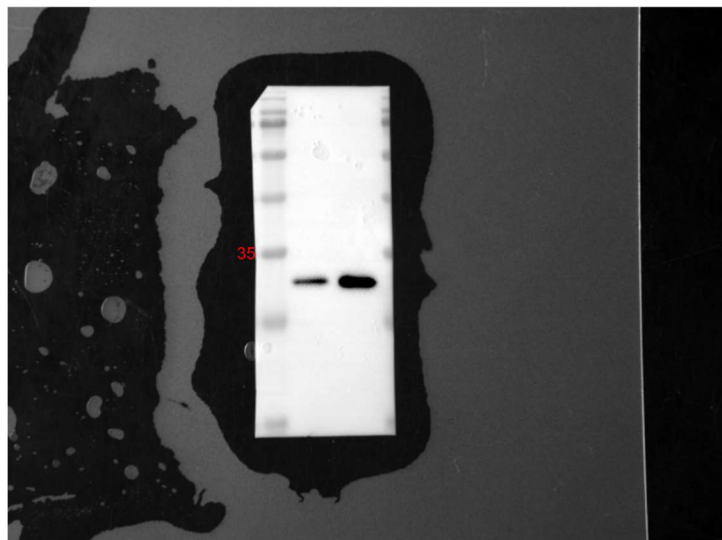

Figure 8F(CDK2)

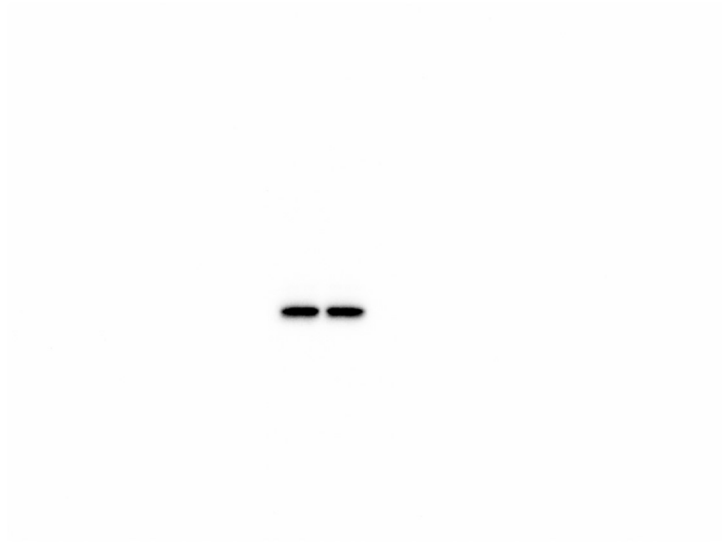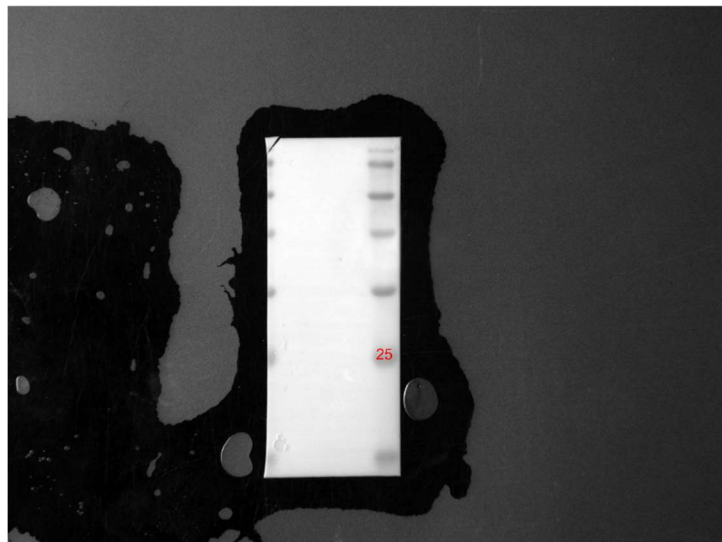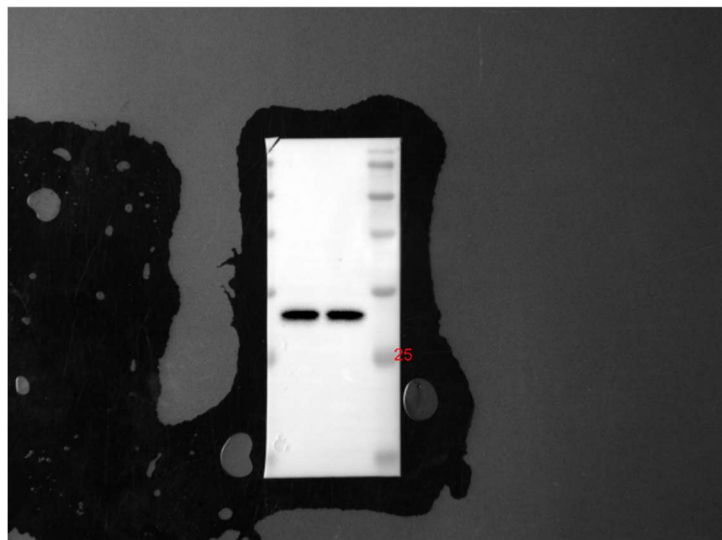

Figure 8F(CDK4)

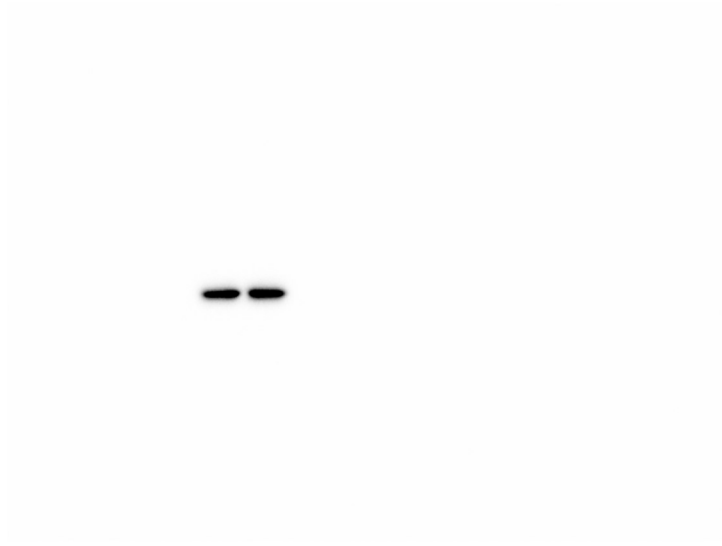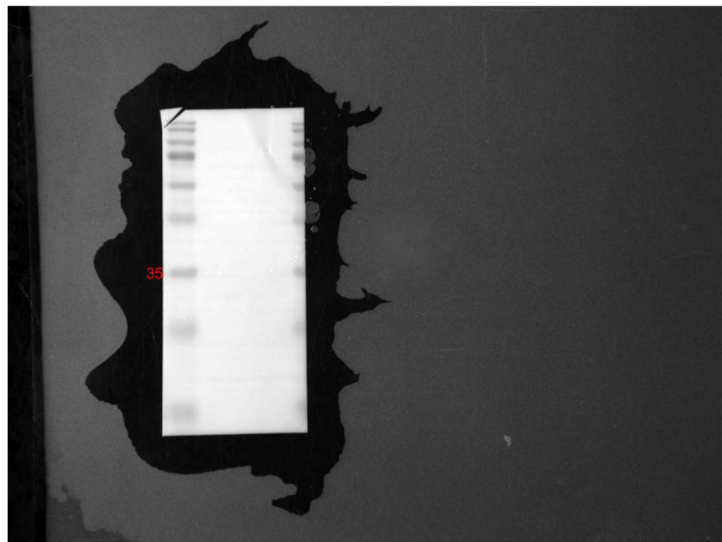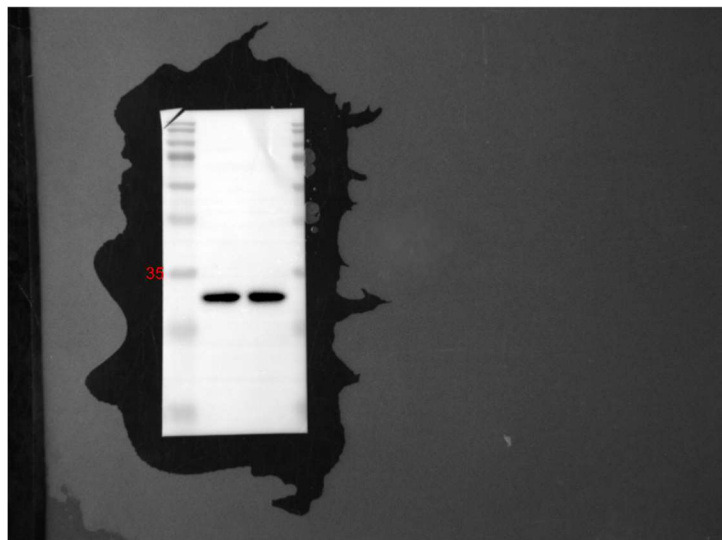

Figure 8F(CDK6)

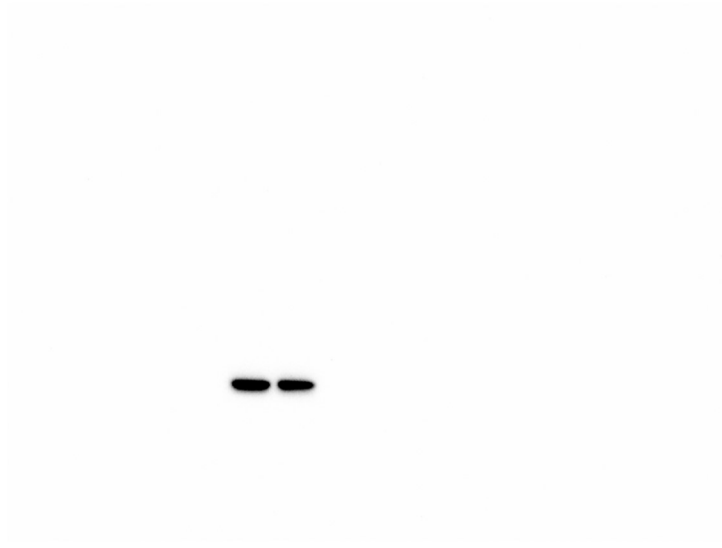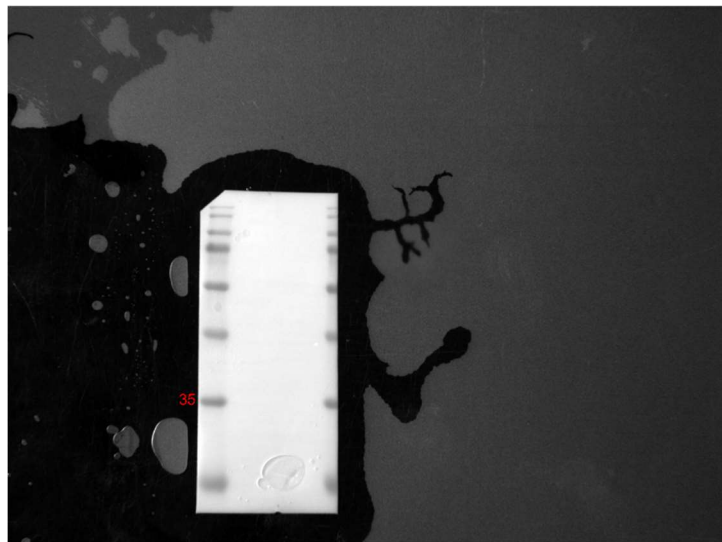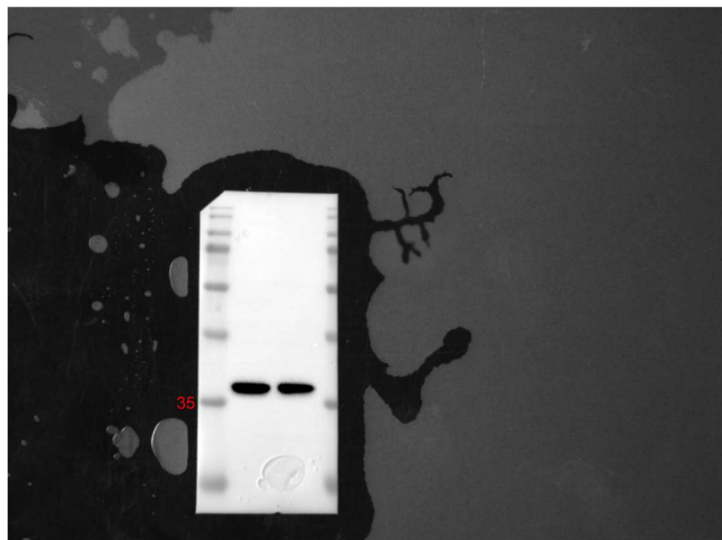

Figure 8F(CDK7)

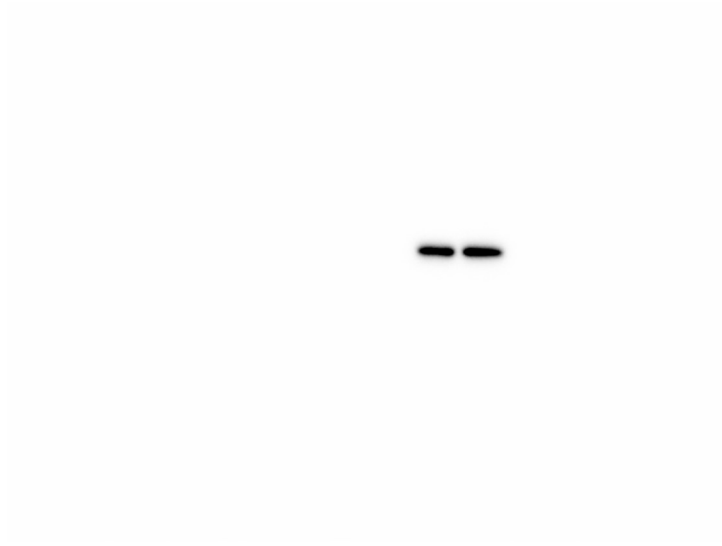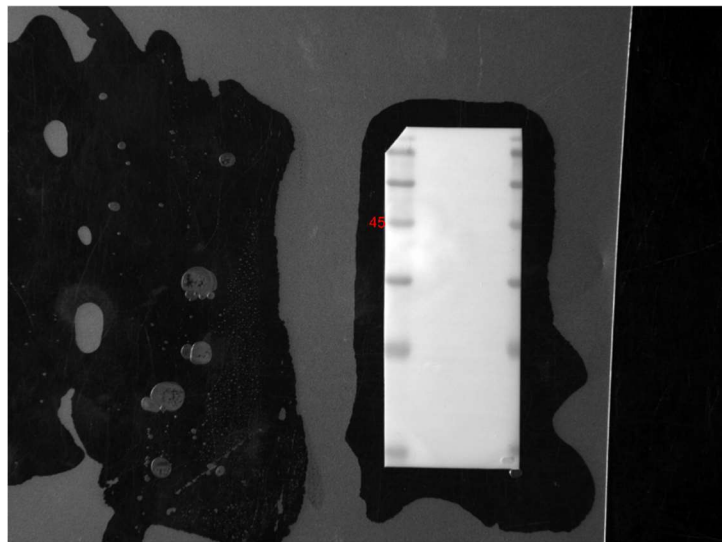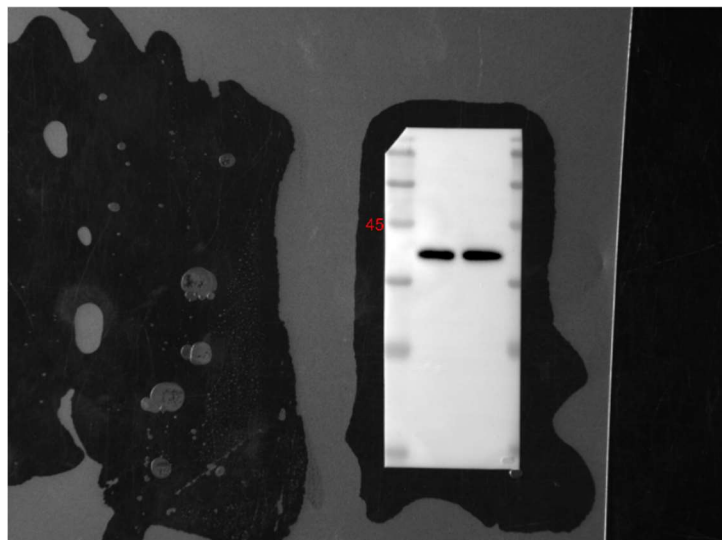

Figure 8F(CDK9)

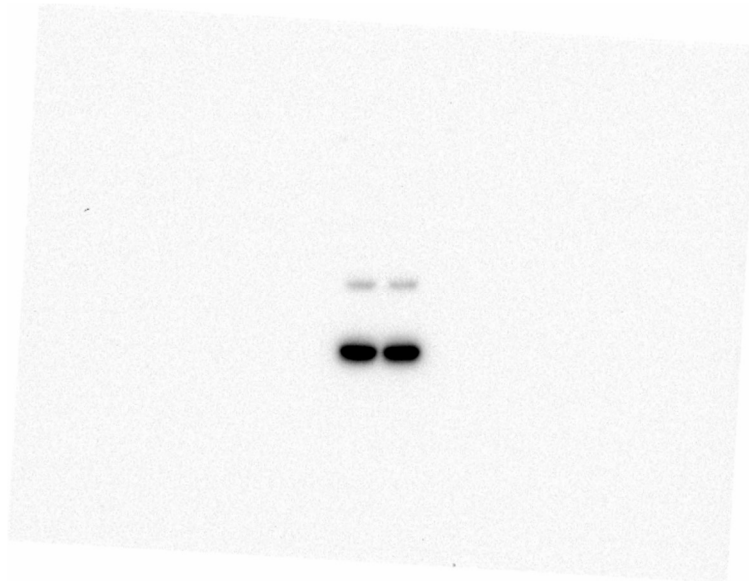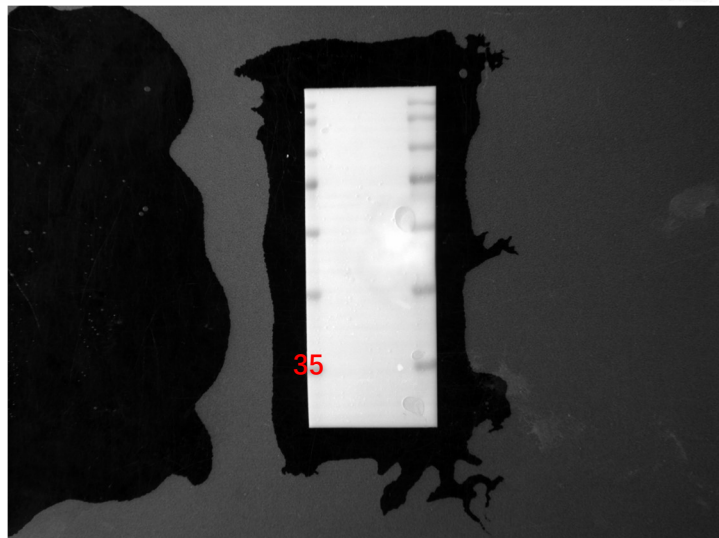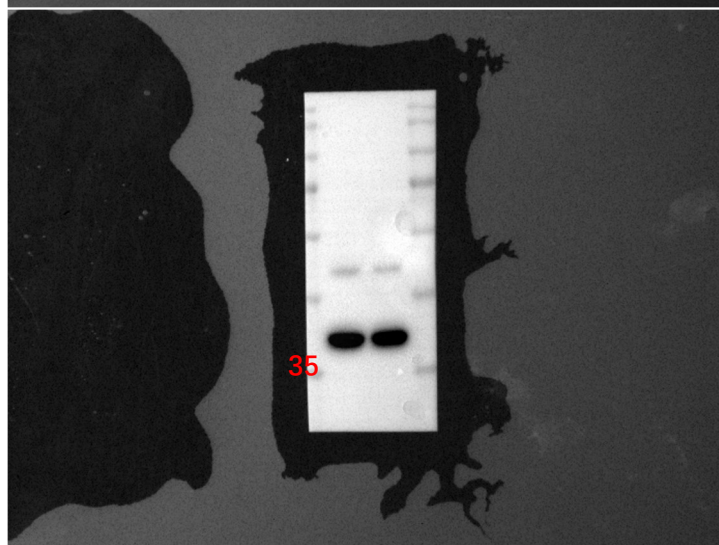

Figure 8F(Tubulin)

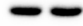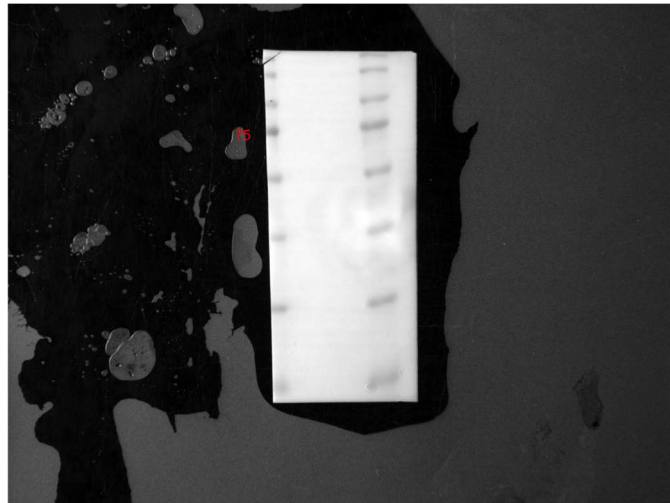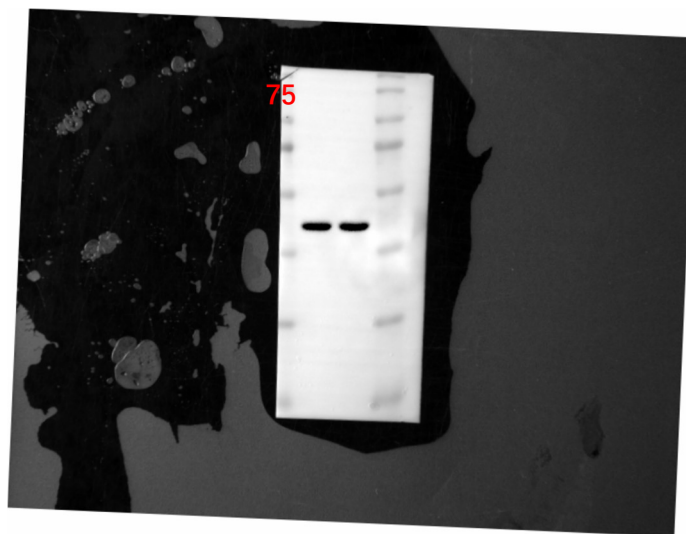

Figure 8F(P65)

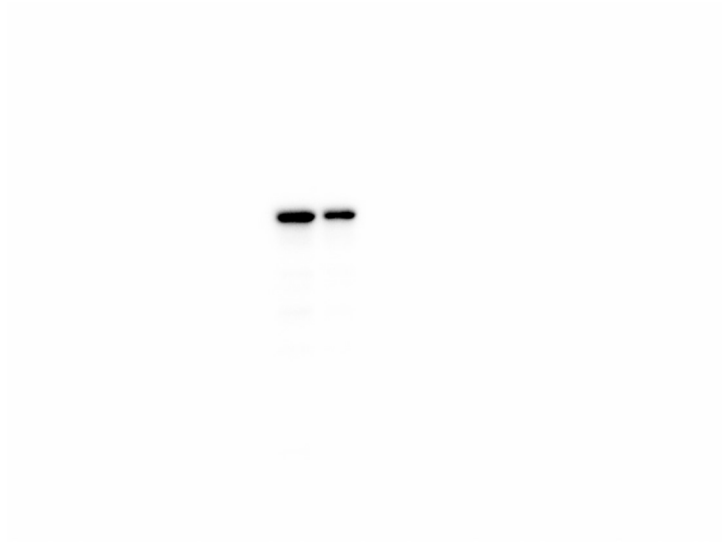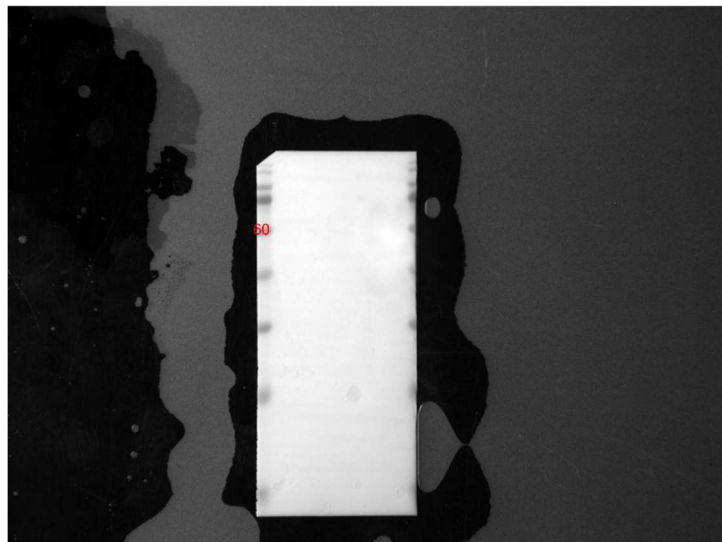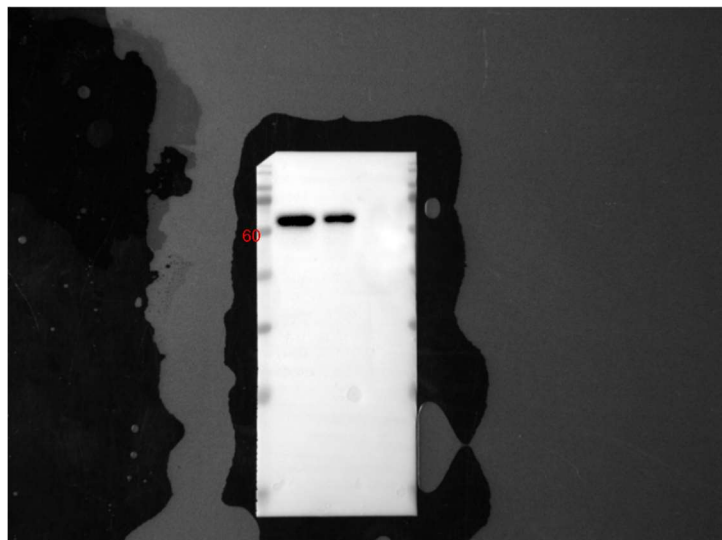

Figure 8F(BCL2)

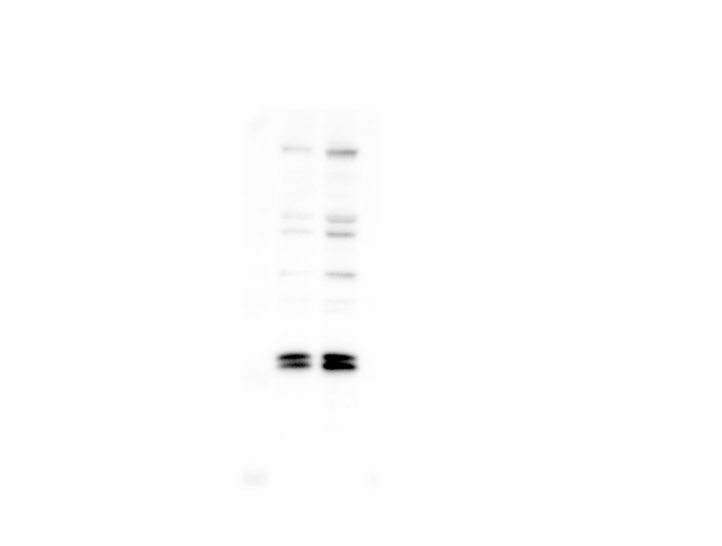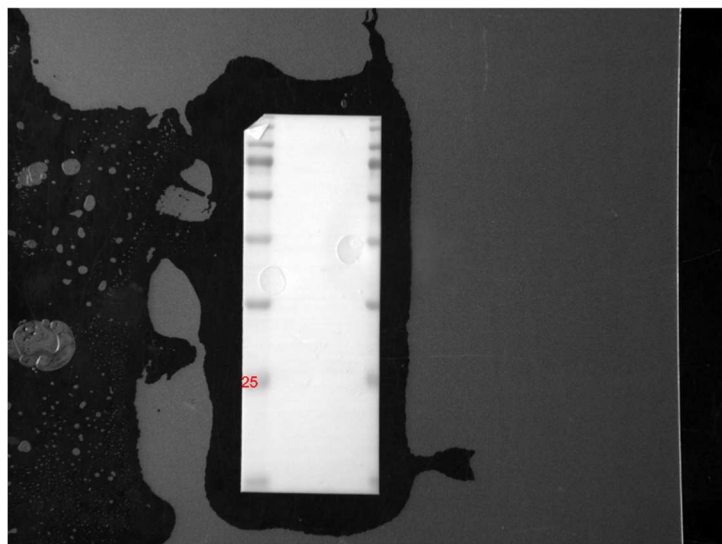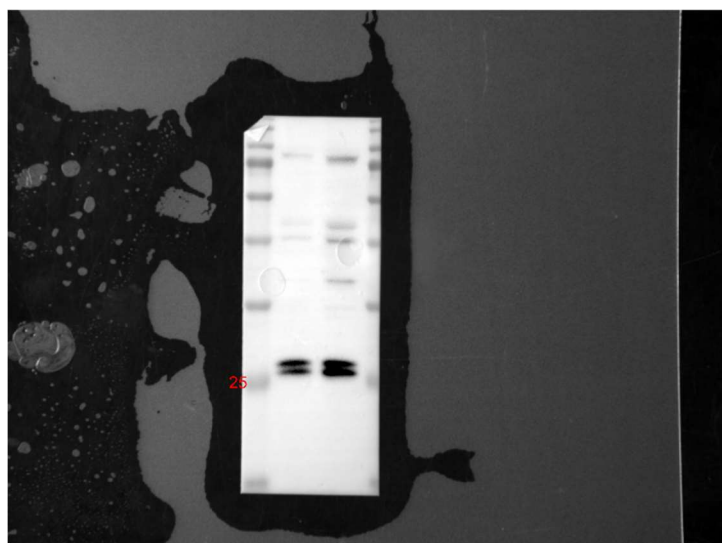

Figure 8F(Caspase3)

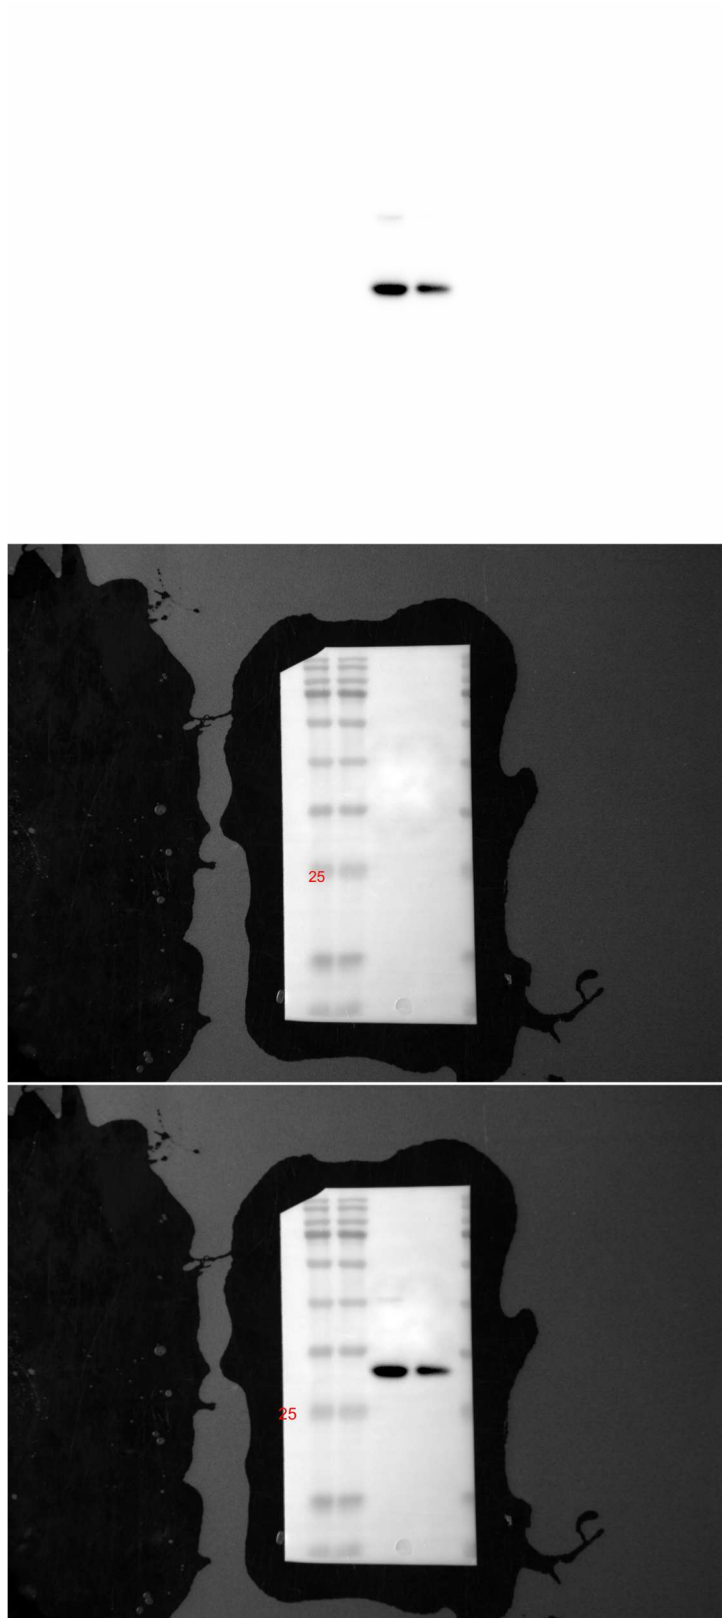

**Figure 8F(p53)**

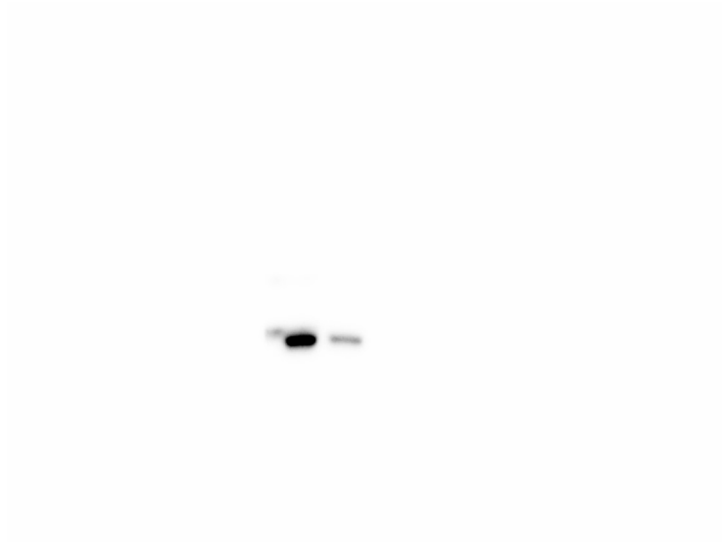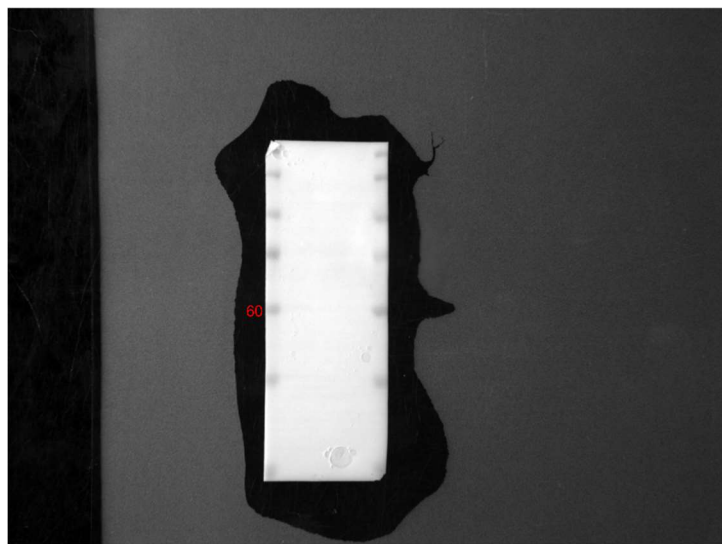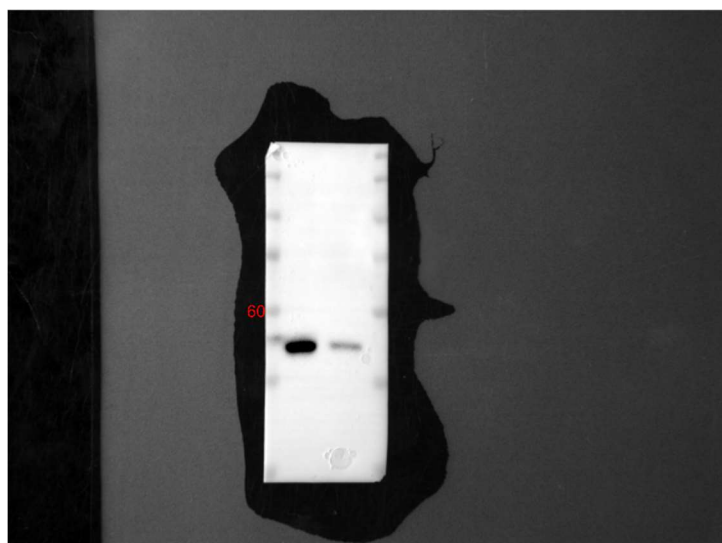

Figure 8F(P-Erk)

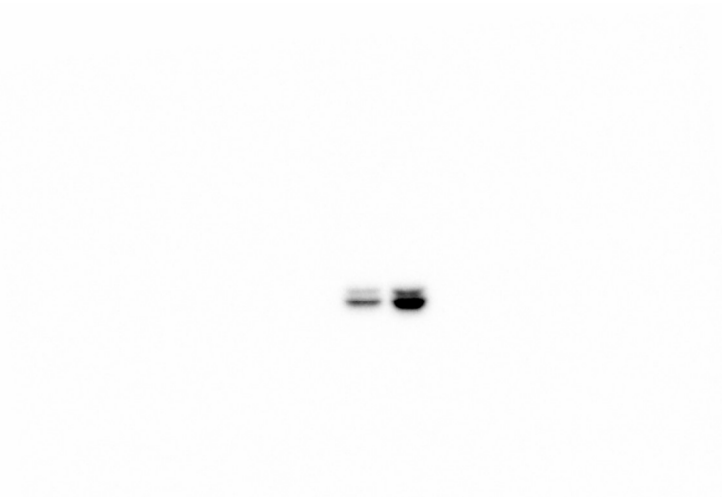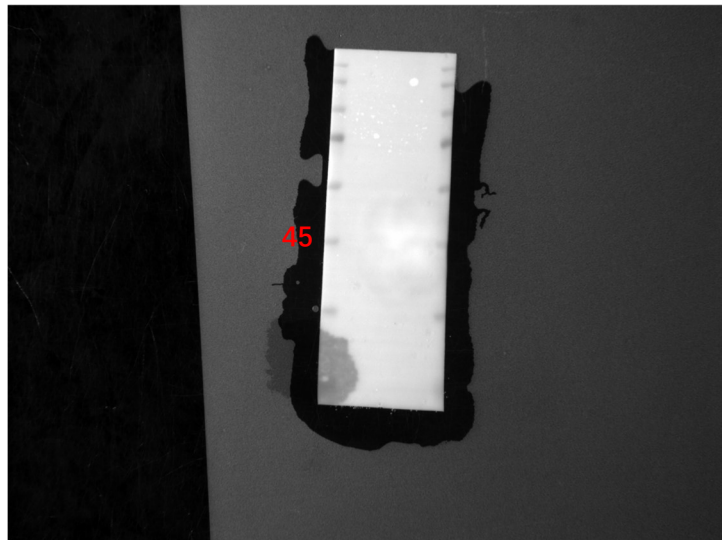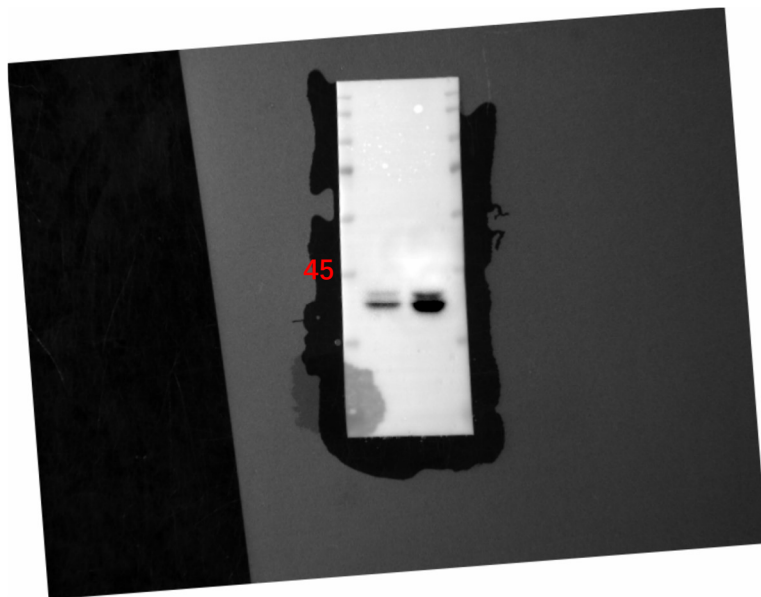

Figure 8F(ERK)

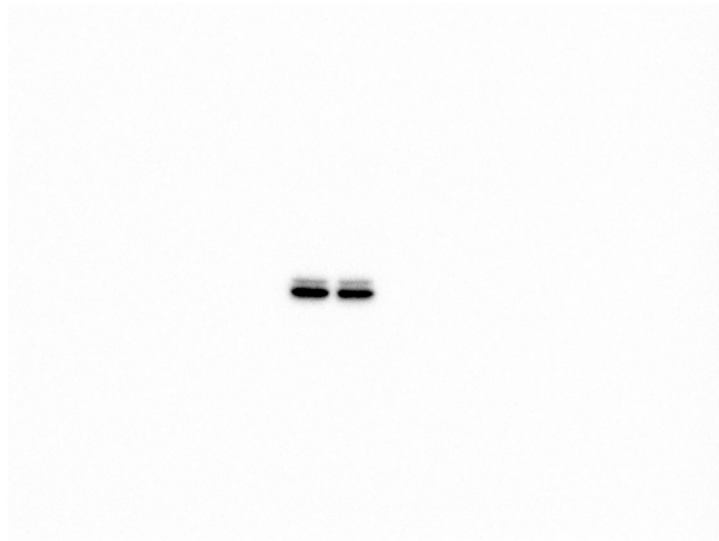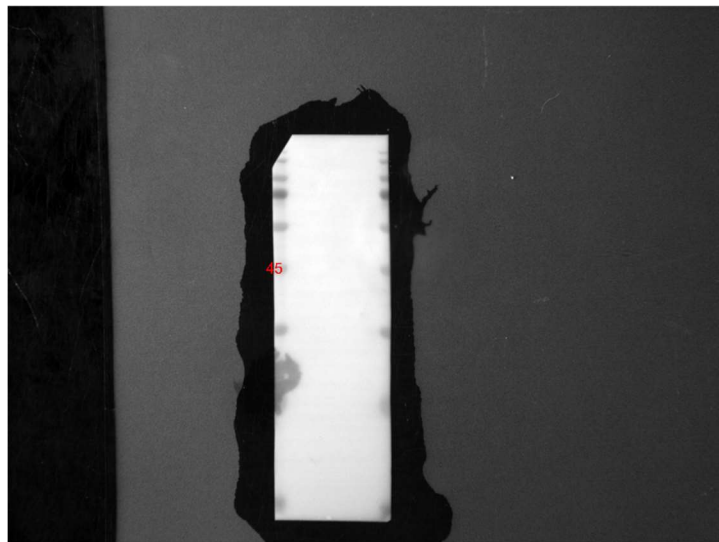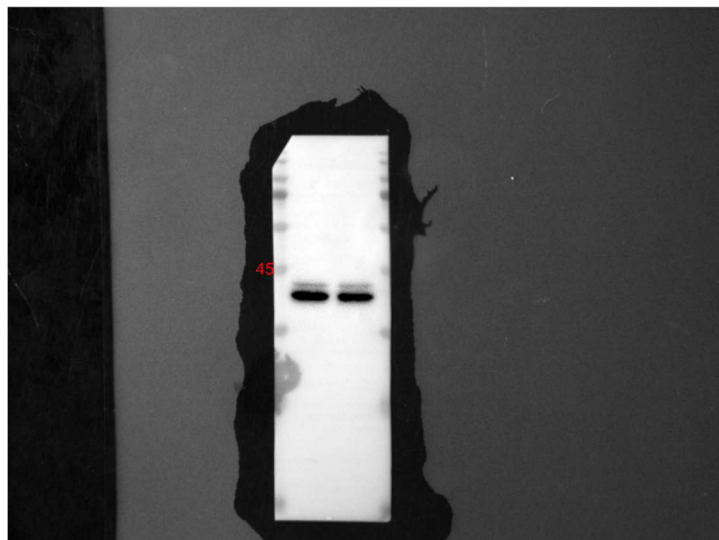

Figure 8F(Tubulin)

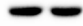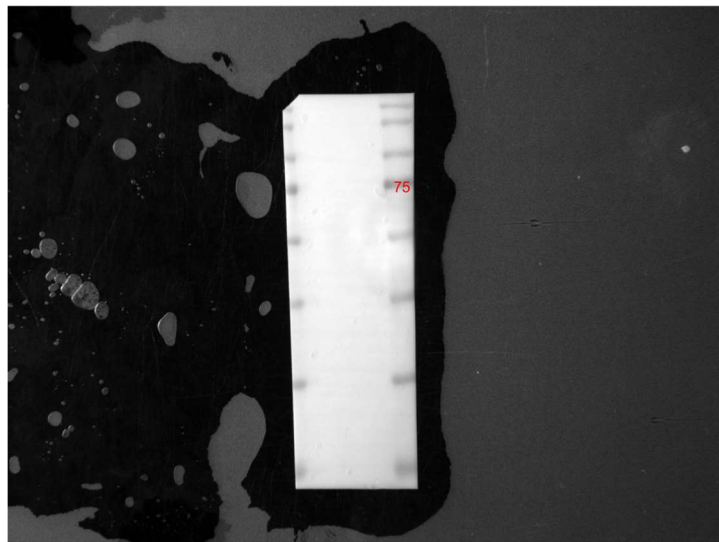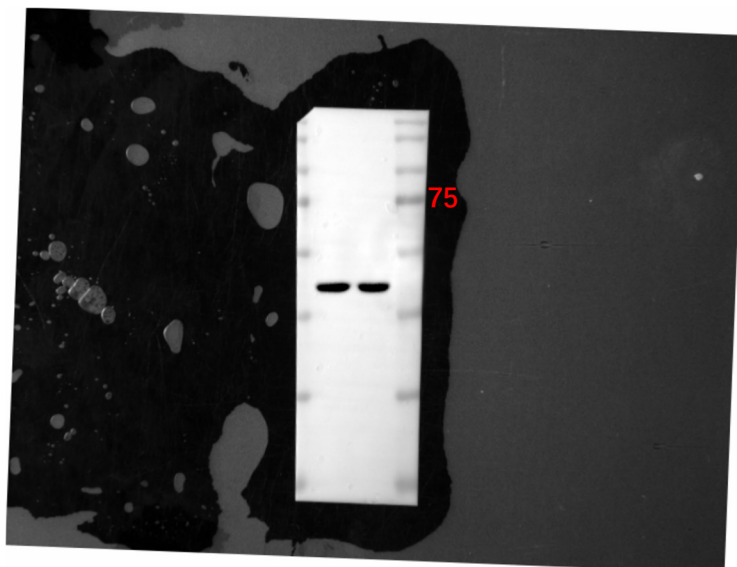

Figure 8G(CDK1)

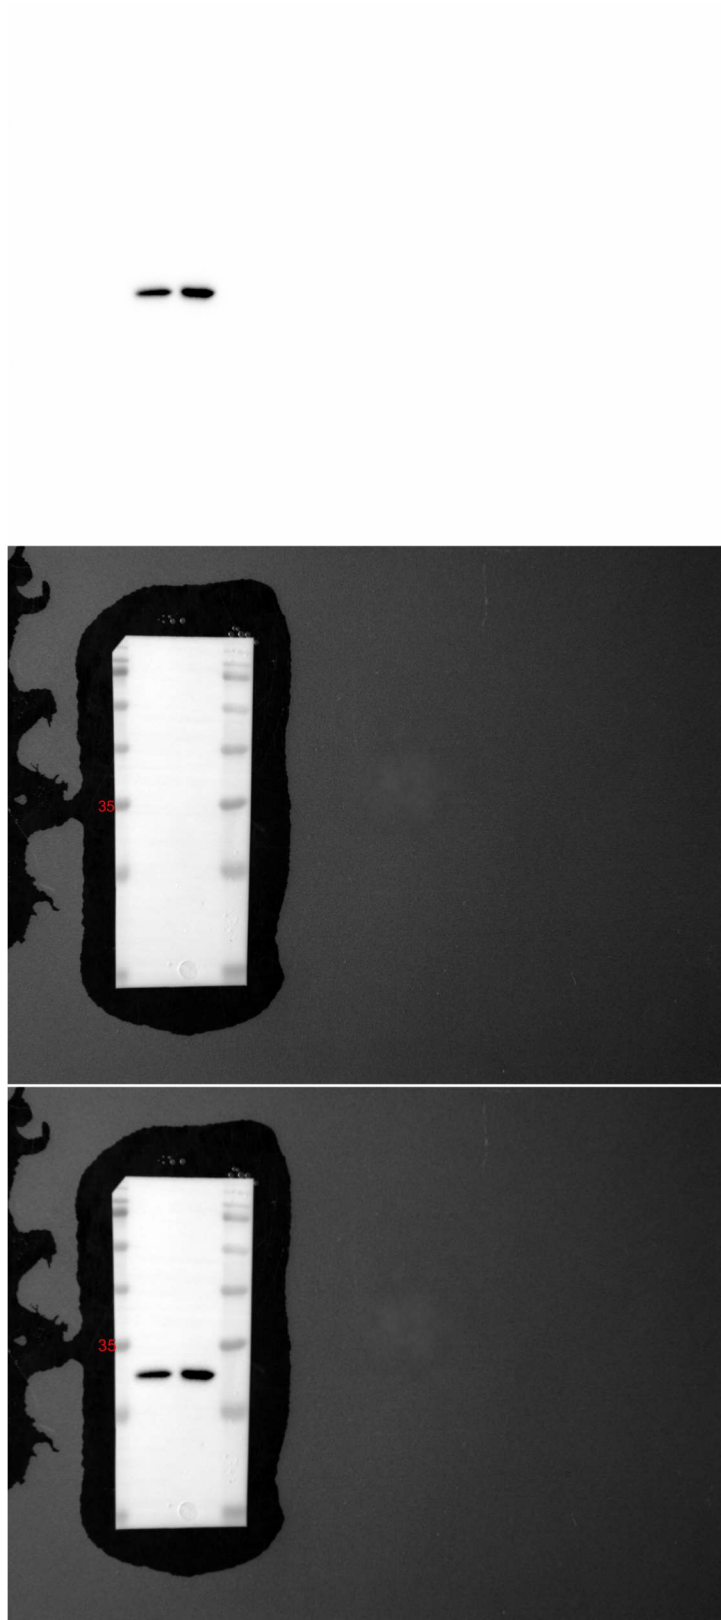

Figure 8G(CDK2)

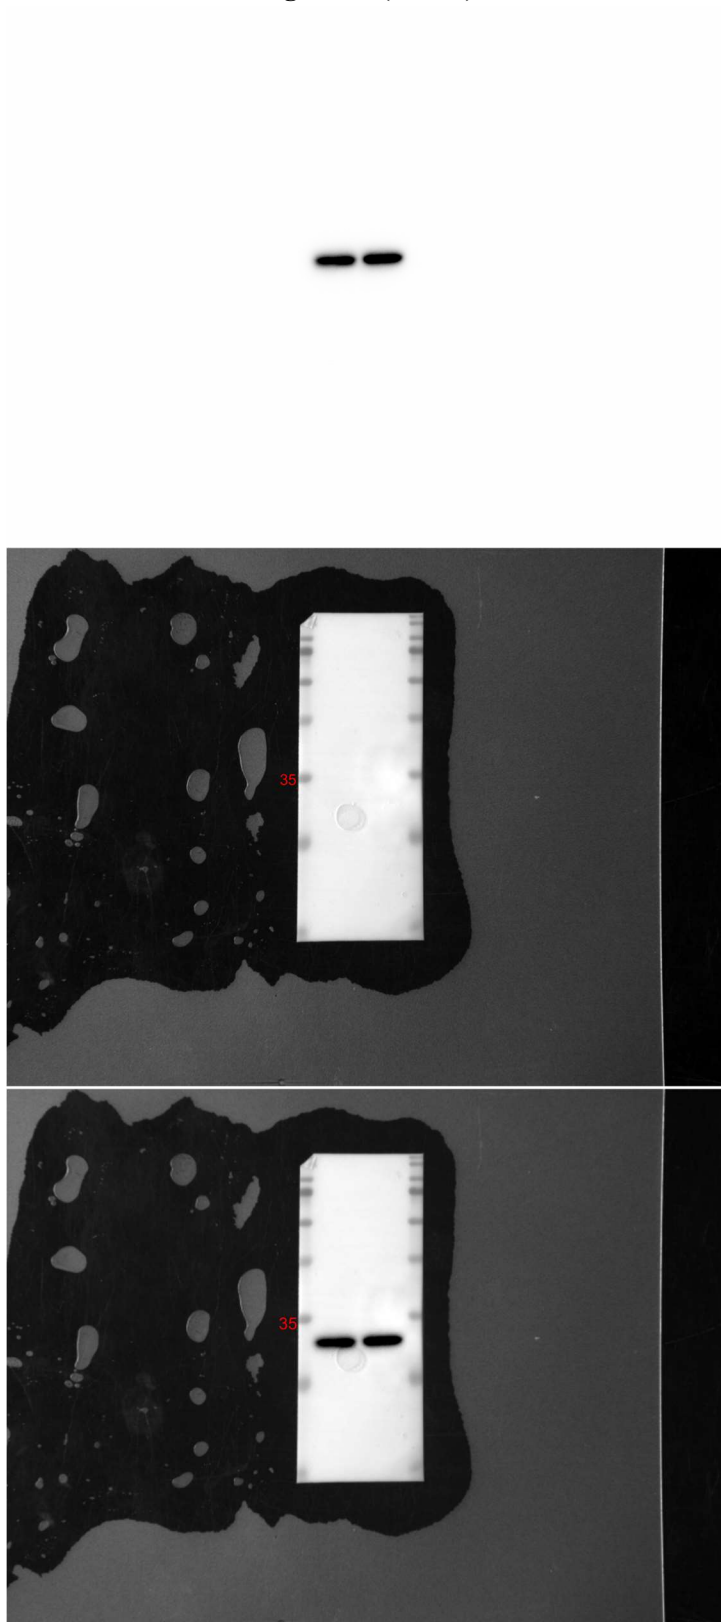

Figure 8G(CDK4)

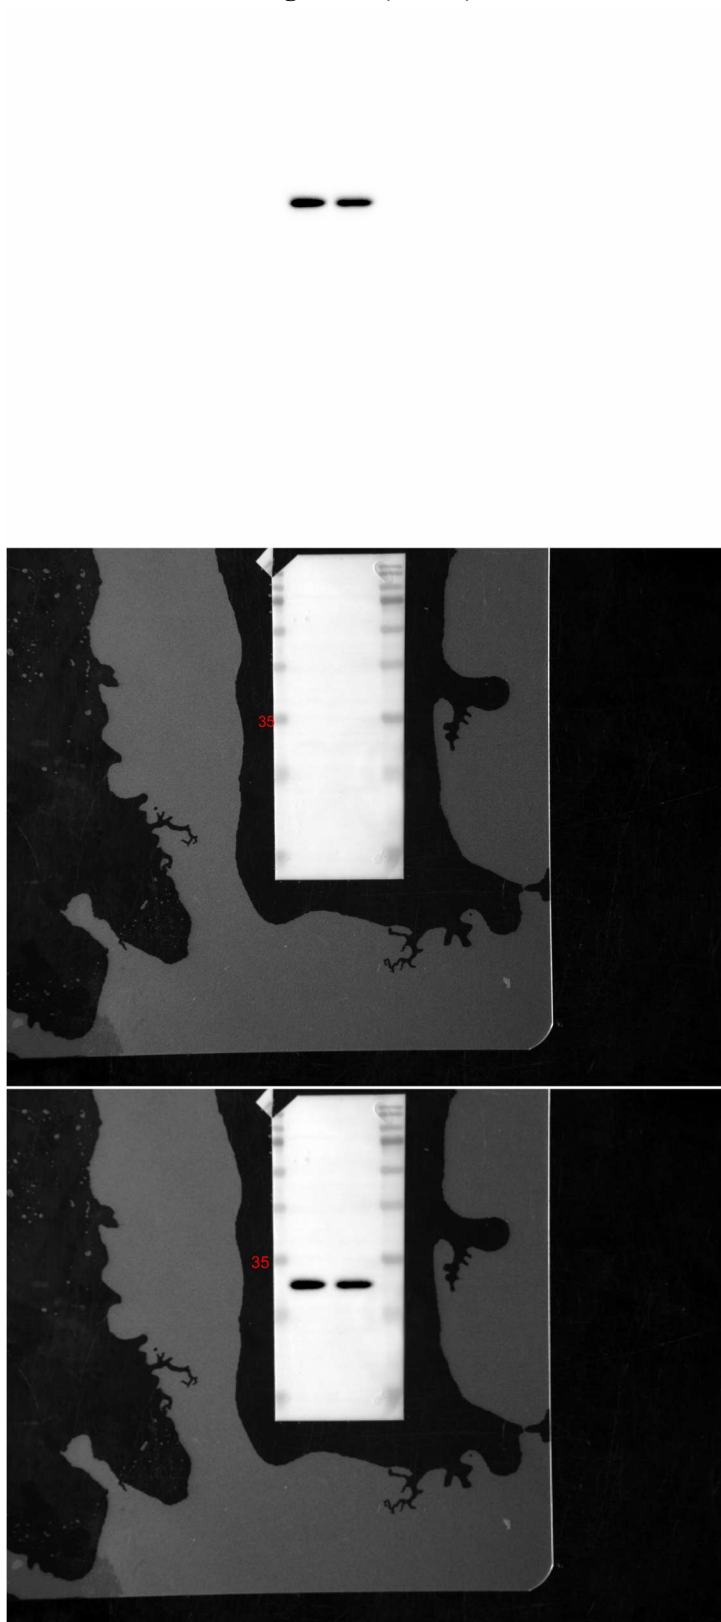

Figure 8G(CDK6)

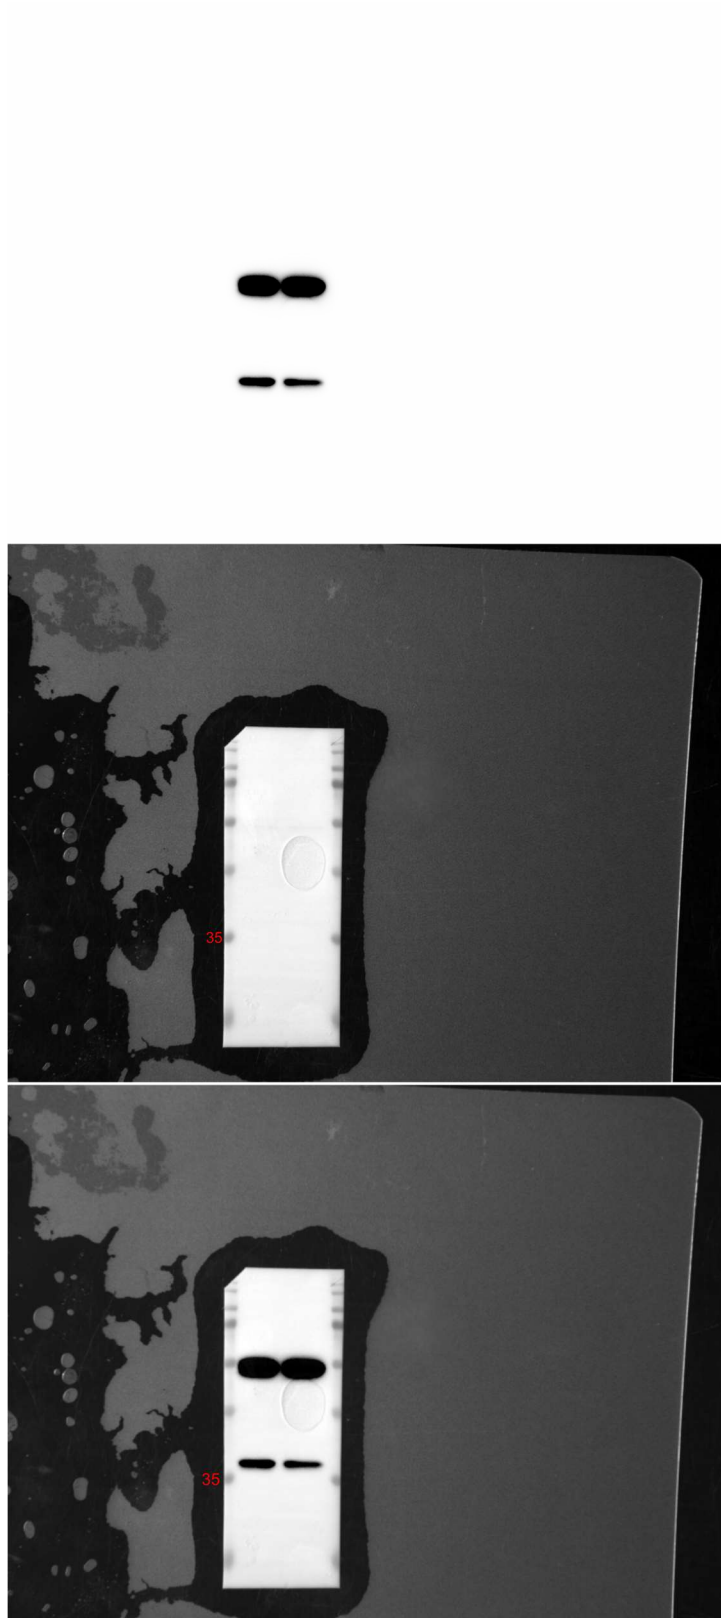

Figure 8G(CDK7)

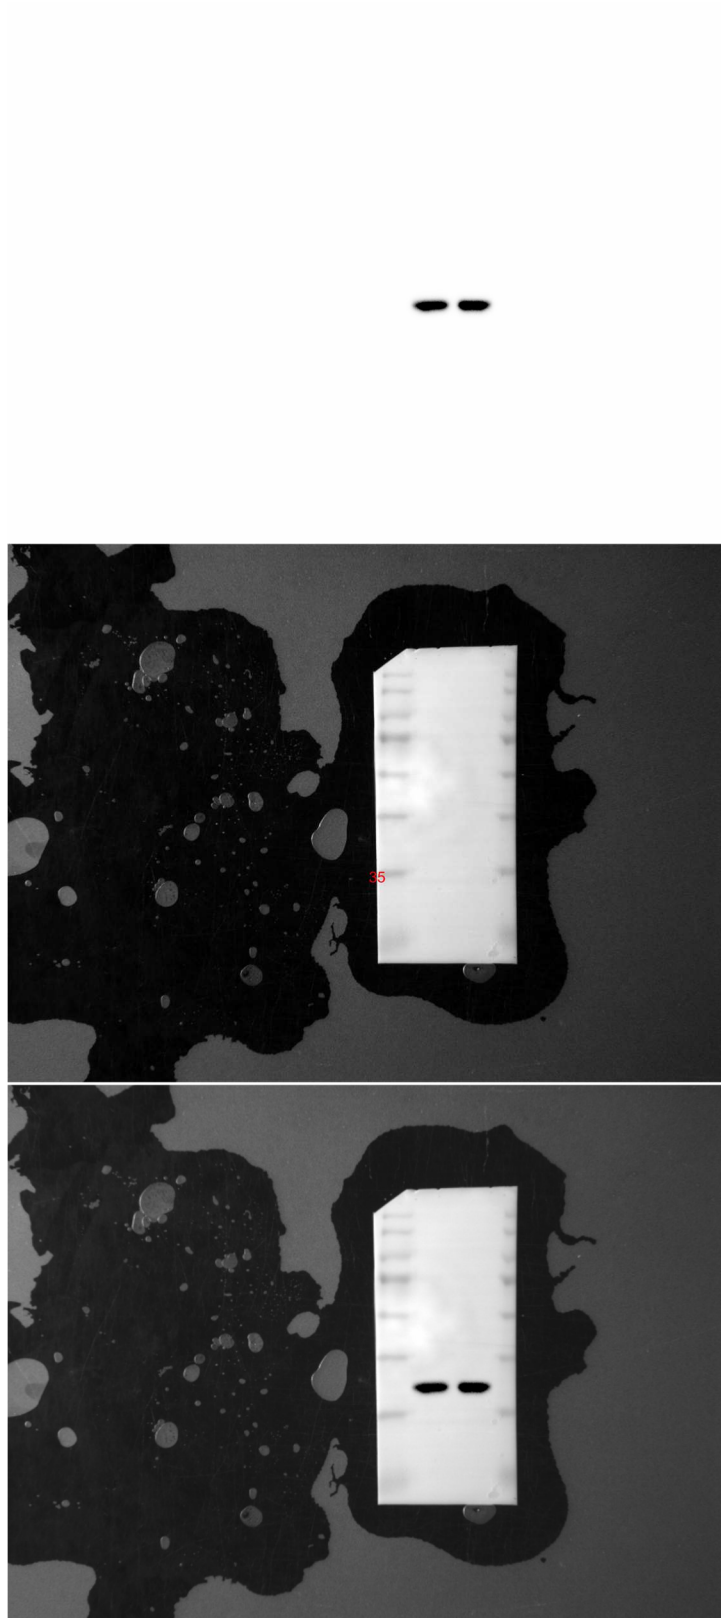

**Figure 8G(CDK9)**

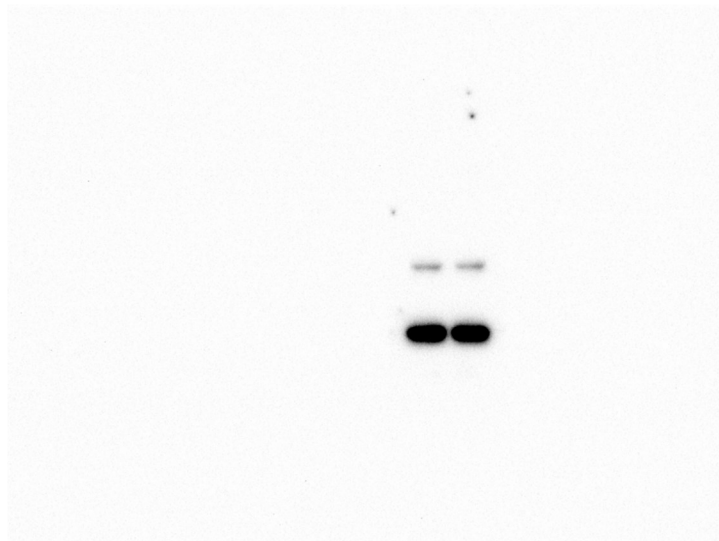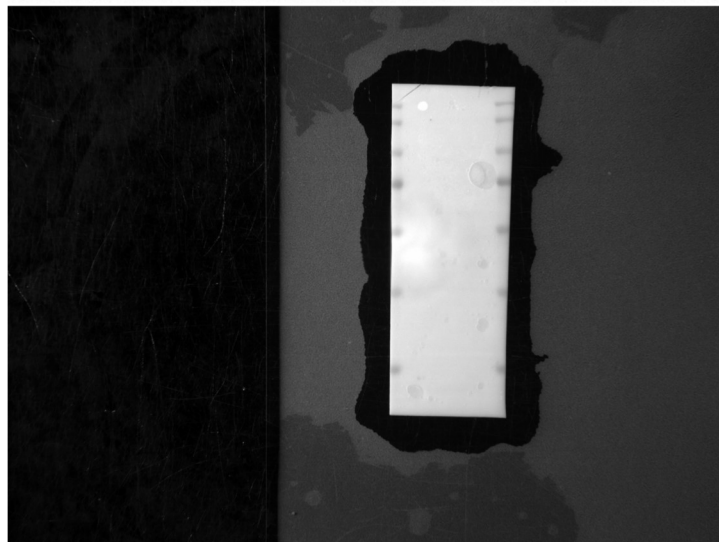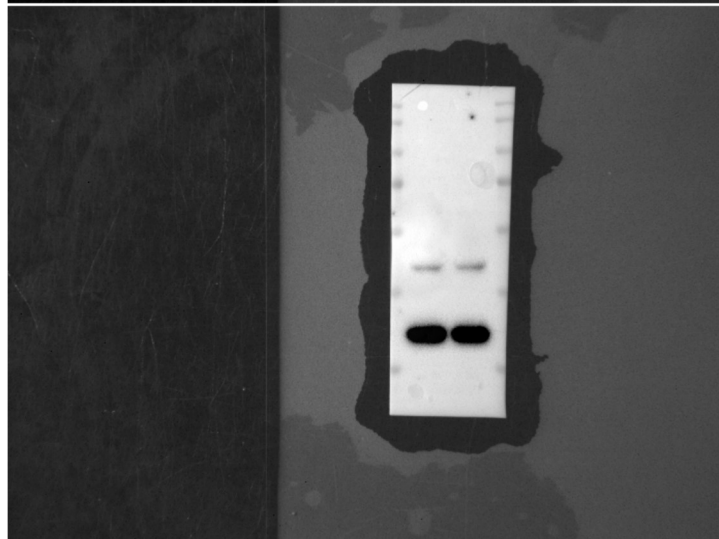

Figure 8G(tubulin)

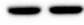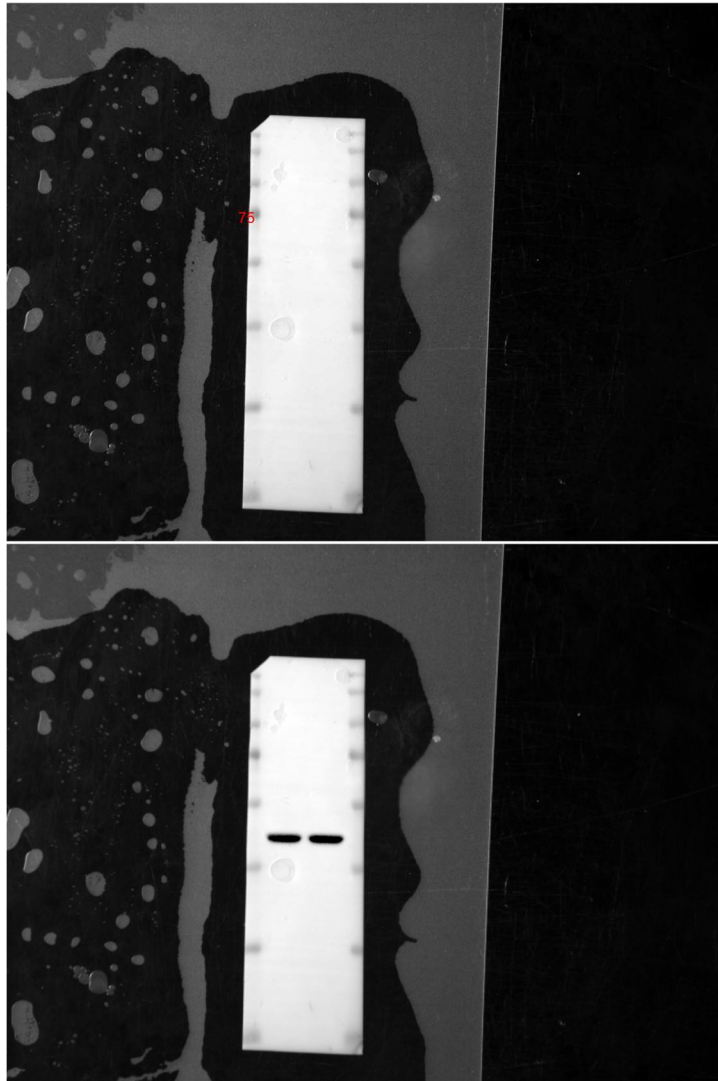

Figure 8G(P65)

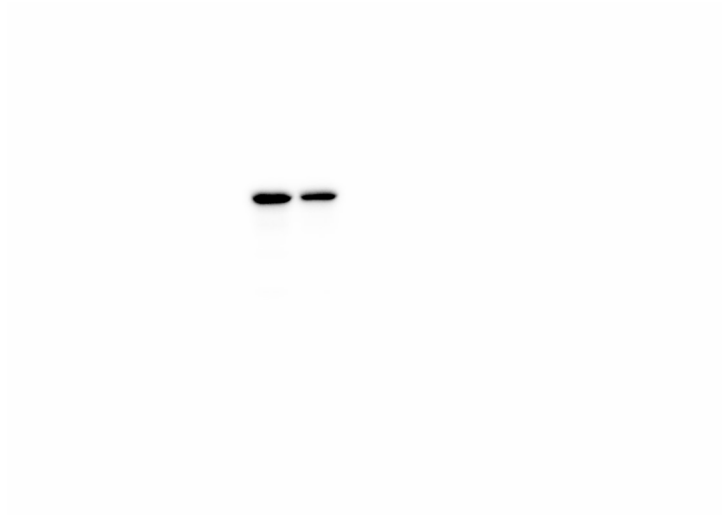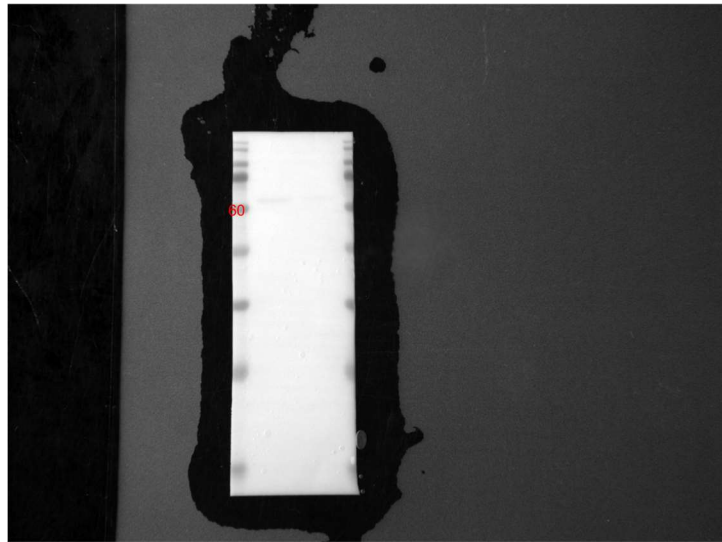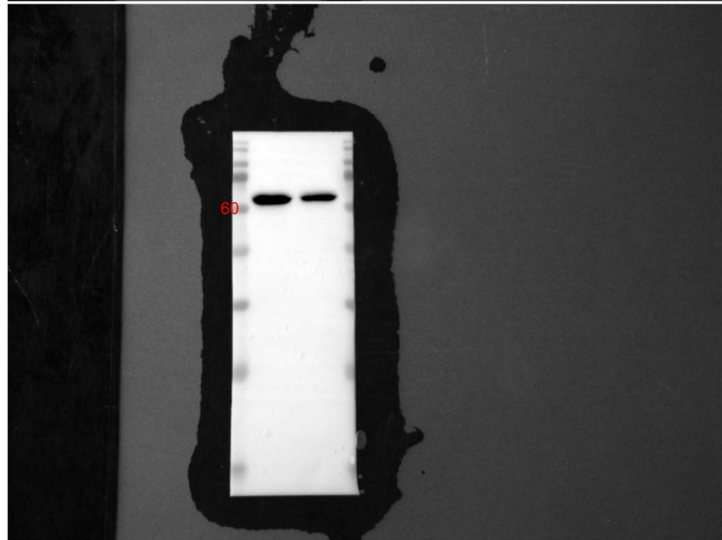

Figure 8G(BCL2)

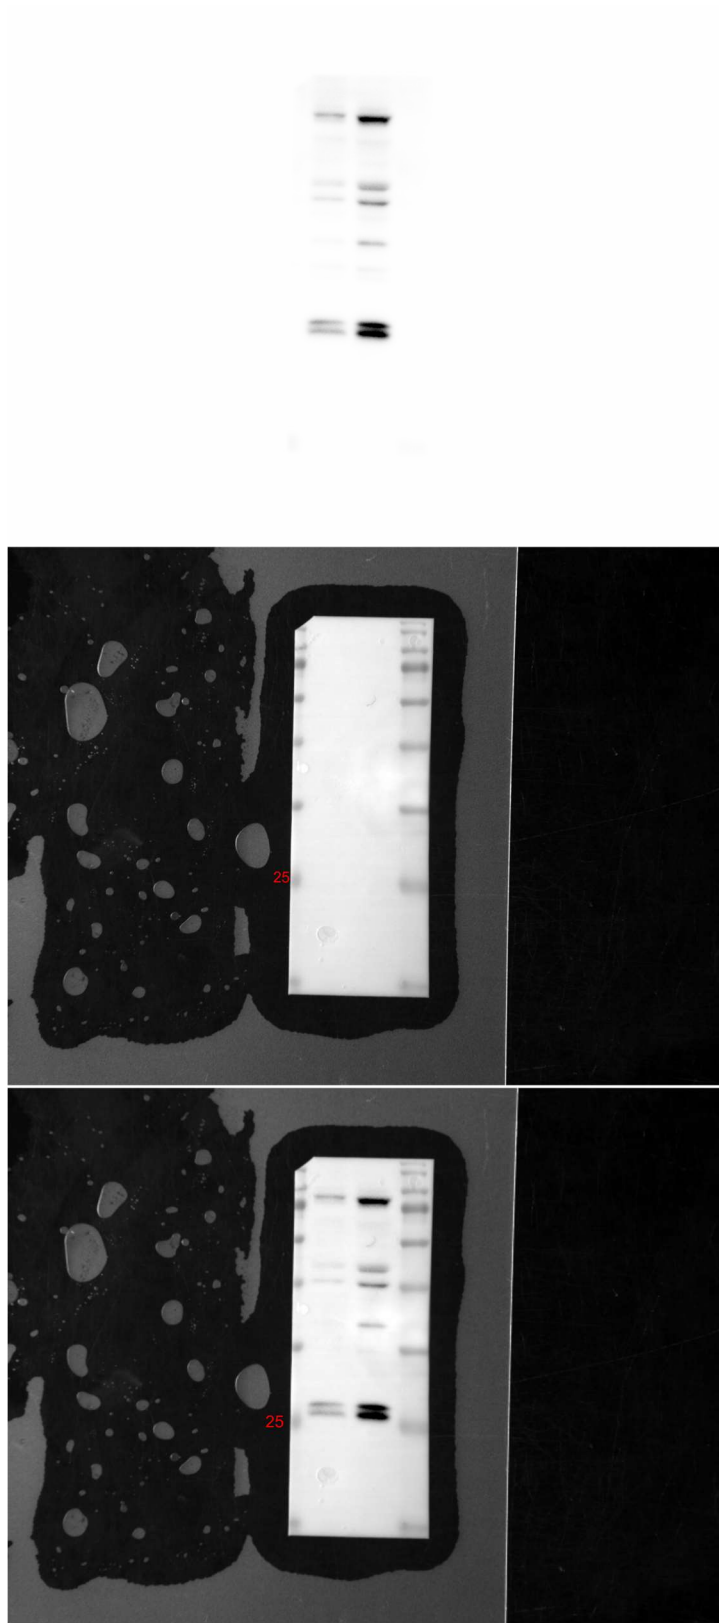

Figure 8G(Caspase3)

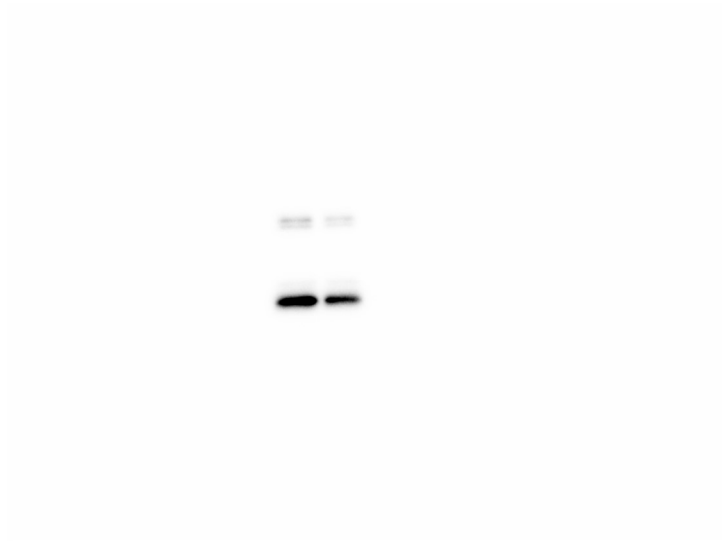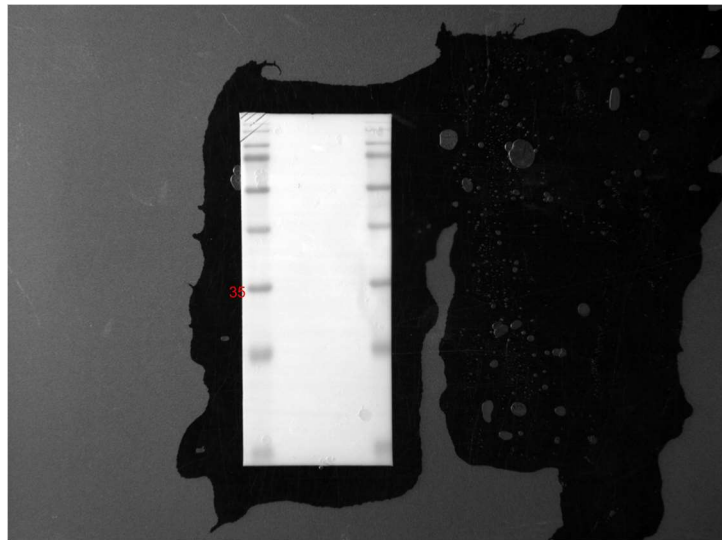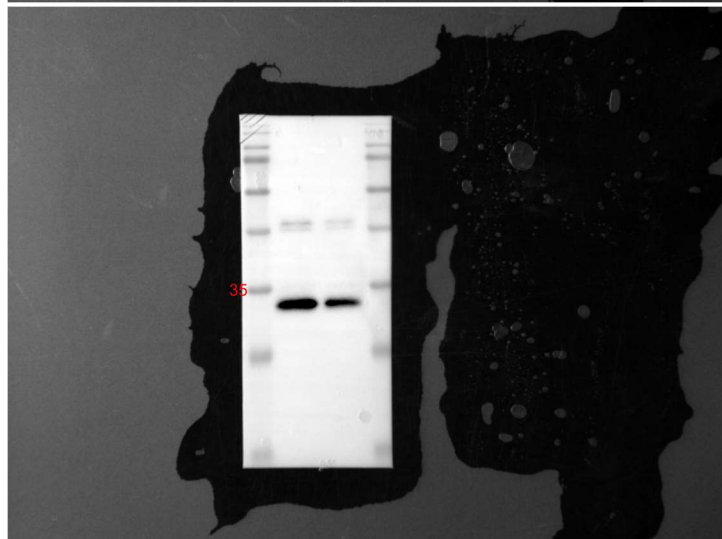

Figure 8G(P53)

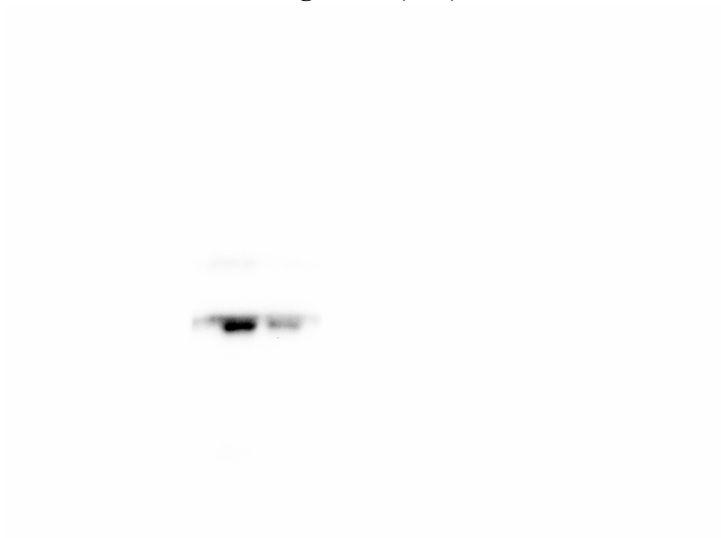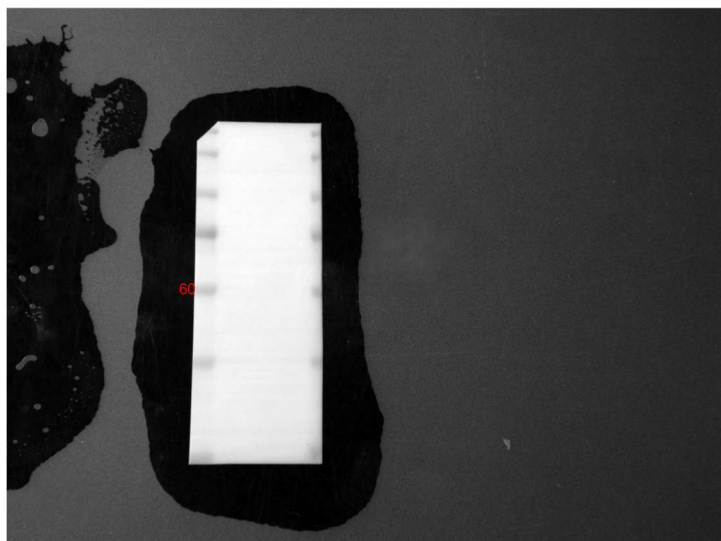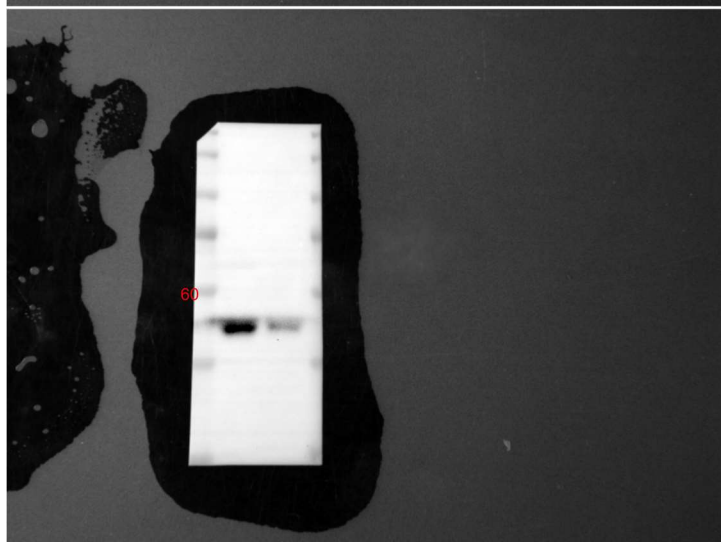

Figure 8G(P-ERK)

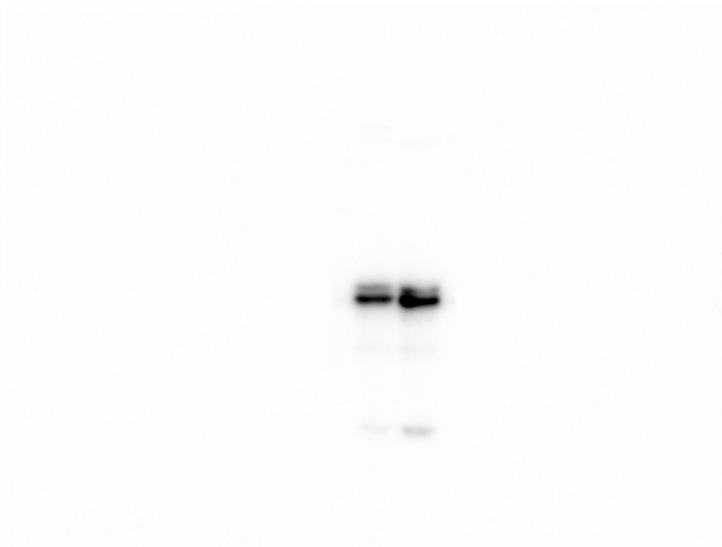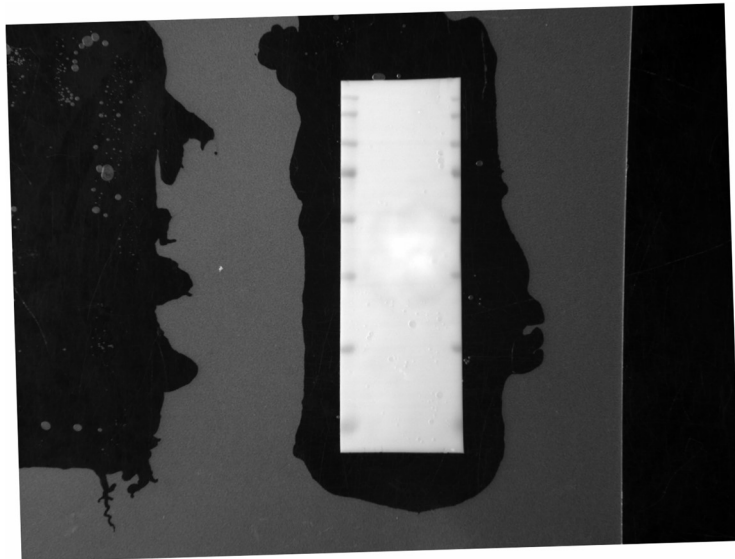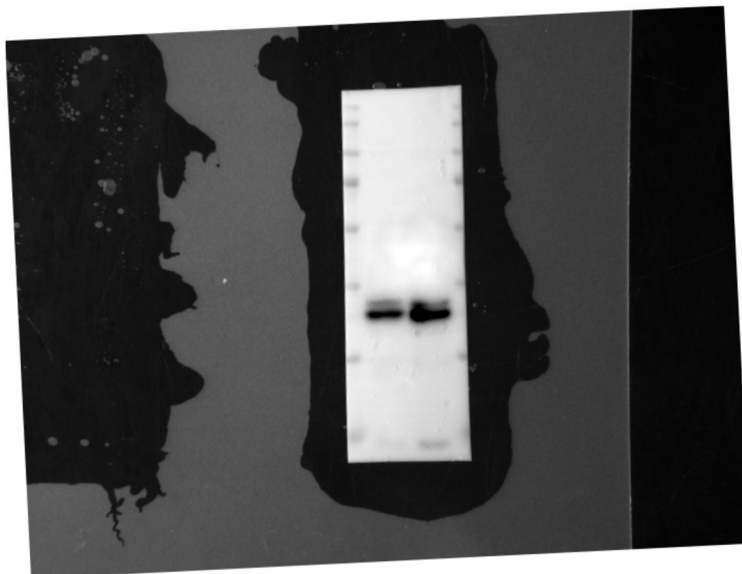

Figure 8G(ERK)

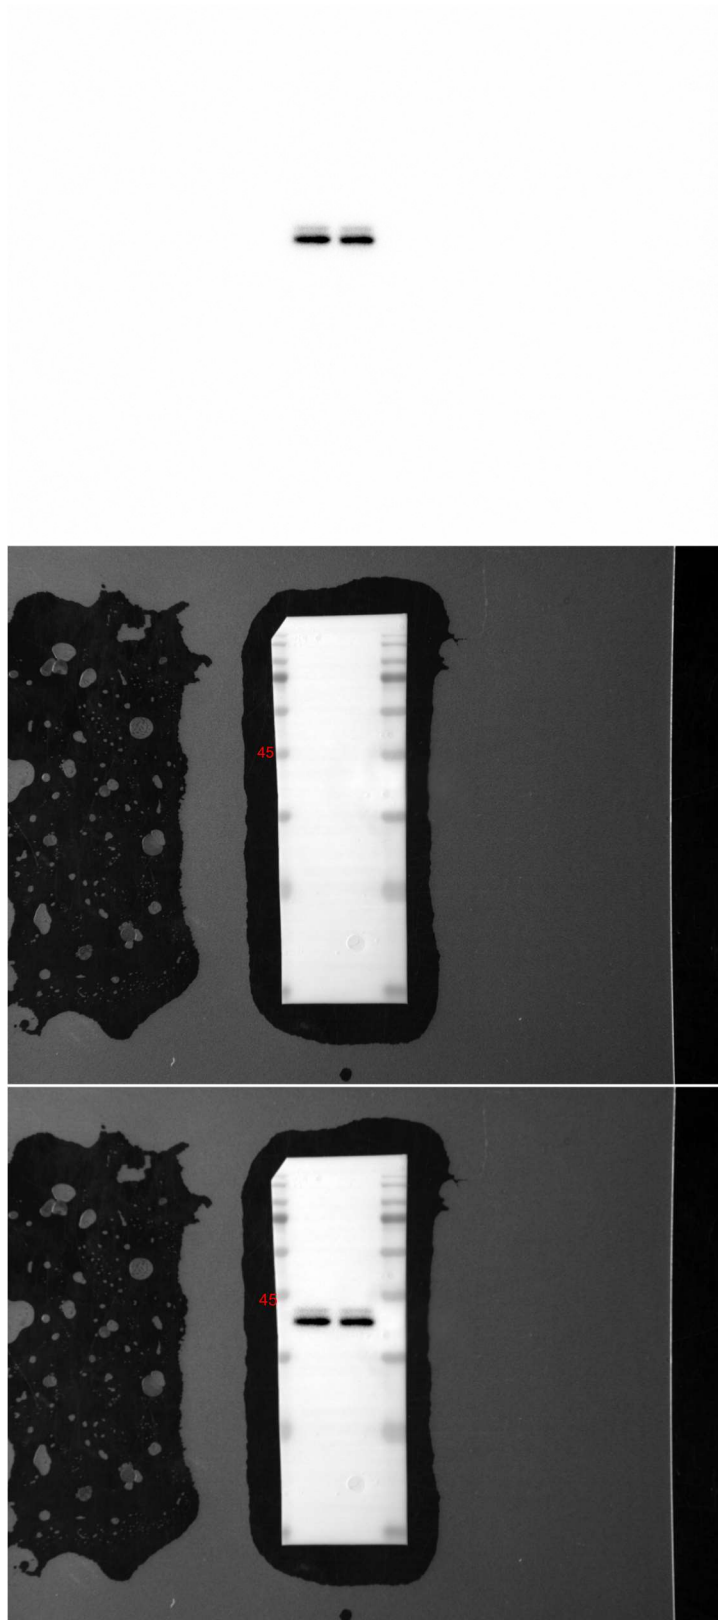

**Figure 8G(TUBULIN)**

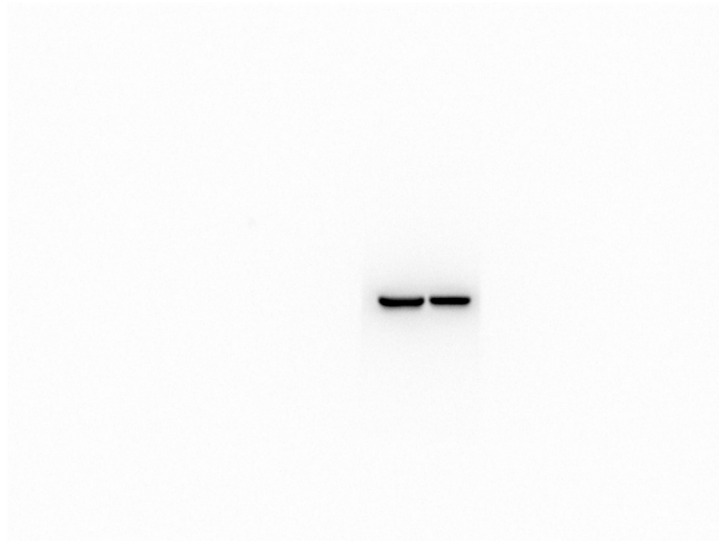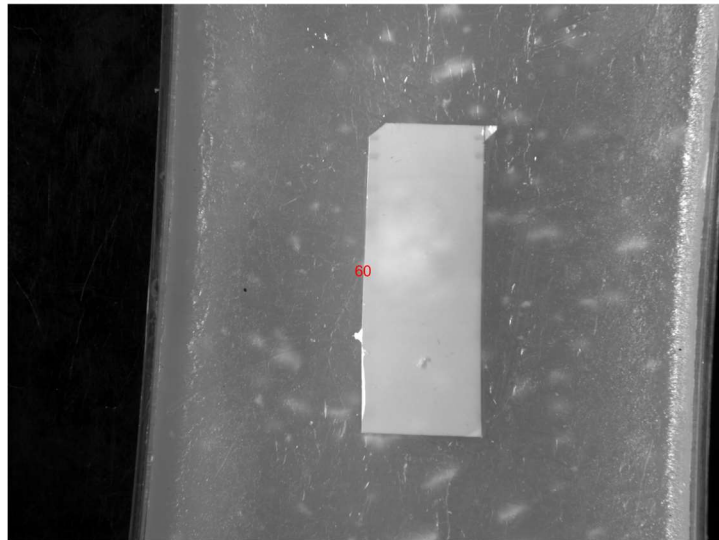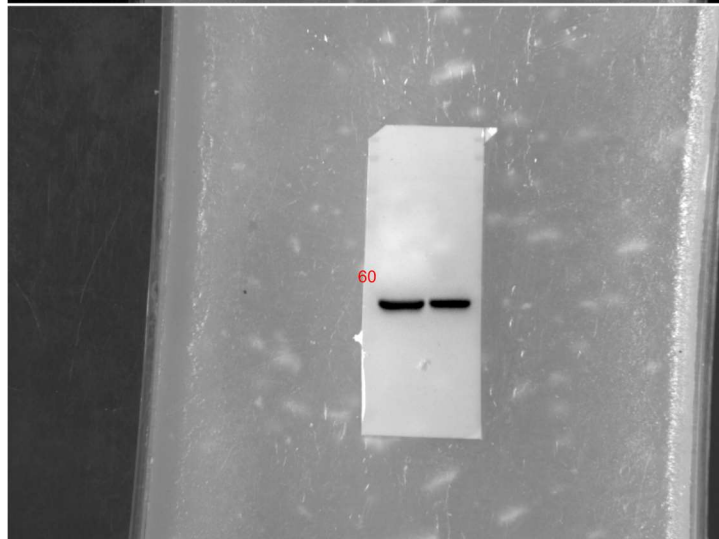

Supplement: MOESM2 [file 41598_2023_41343_MOESM2_ESM-1.pdf]
